# Supplementary material
Source: publisher figshare collection journal article supplement (https://sage.figshare.com/ndownloader/files/24172150)
Supplement: Supplementary file 1 [file 24172150]

## Sheet: General
				Glycosaminoglycan-protein interactions: the first draft of the glycosaminoglycan interactome
				Sylvain D. Vallet, Olivier Clerc and Sylvie Ricard-Blum*
								Univ Lyon, University Claude Bernard Lyon 1, CNRS, INSA Lyon, CPE, Institute of Molecular and Supramolecular Chemistry and Biochemistry, UMR 5246, F-69622 Villeurbanne cedex, France.
			SUPPLEMENTARY TABLE S1

## Sheet: Protein-GAG interactome
Partner A (glycosaminoglycan name)	Partner B (gene name)	Source(s) of interaction data	PMID(s)
Chondroitin sulfate	COL1A1,COL1A1,COL1A2 CPX	MatrixDB	19542224
Chondroitin sulfate	COL4A1,COL4A1,COL4A2 CPX	MatrixDB	19542224
Chondroitin sulfate	THBS1,THBS1,THBS1 CPX	SRB lab manual curation	9949192
Chondroitin sulfate	PDGFB,PDGFB CPX	SRB lab manual curation	19631712
Chondroitin sulfate	COL6A1,COL6A2,COL6A3 CPX	MatrixDB	19542224
Chondroitin sulfate	AGRN	GO;UniProtKB	GO_REF:0000024
Chondroitin sulfate	SEMA3E	SRB lab manual curation	20375348
Chondroitin sulfate	CHUK	SRB lab manual curation	20375348
Chondroitin sulfate	NUDT21	SRB lab manual curation	20375348
Chondroitin sulfate	CTSV	SRB lab manual curation	15192101
Chondroitin sulfate	RPS6KA5	SRB lab manual curation	20375348
Chondroitin sulfate	MAP4K4	SRB lab manual curation	20375348
Chondroitin sulfate	PAK4	SRB lab manual curation	20375348
Chondroitin sulfate	SOD1	MatrixDB	3223905
Chondroitin sulfate	F2	SRB lab manual curation	9949192
Chondroitin sulfate	PLAU	SRB lab manual curation	9949192
Chondroitin sulfate	APOE	MatrixDB;Dataset PMID:24246365	10526164
Chondroitin sulfate	APP	UniProtKB
Chondroitin sulfate	FGF1	MatrixDB	24447999
Chondroitin sulfate	SERPINE2	SRB lab manual curation	9949192
Chondroitin sulfate	CTSD	SRB lab manual curation	19919557
Chondroitin sulfate	THBS1	MatrixDB	19542224
Chondroitin sulfate	FGF2	MatrixDB	24447999
Chondroitin sulfate	HGF	MatrixDB	8780385
Chondroitin sulfate	FLT1	SRB lab manual curation	20375348
Chondroitin sulfate	EFNA1	SRB lab manual curation	20375348
Chondroitin sulfate	PTN	GO;UniProtKB	26896299;16373346
Chondroitin sulfate	FGF7	MatrixDB	24447999
Chondroitin sulfate	TGM2	SRB lab manual curation	28199387
Chondroitin sulfate	ITGA6	SRB lab manual curation	20375348
Chondroitin sulfate	CTSS	SRB lab manual curation	23968158
Chondroitin sulfate	EPHB2	SRB lab manual curation	20375348
Chondroitin sulfate	TIMP3	SRB lab manual curation	25176127
Chondroitin sulfate	DCC	SRB lab manual curation	20375348
Chondroitin sulfate	CTSK	SRB lab manual curation	25422423;14645229;15192101
Chondroitin sulfate	CSNK1A1	SRB lab manual curation	20375348
Chondroitin sulfate	CSNK1D	SRB lab manual curation	20375348
Chondroitin sulfate	EFNA3	SRB lab manual curation	20375348
Chondroitin sulfate	PLK1	SRB lab manual curation	20375348
Chondroitin sulfate	FGF8	MatrixDB	24447999
Chondroitin sulfate	TNFAIP6	Dataset PMID:29362135	24403066;14707130;25135638;26685054;9237673;18806261;19729381
Chondroitin sulfate	COL18A1 PFRAG1 (PRO_0000005794)*	MatrixDB	19542224
Chondroitin sulfate	LOX PFRAG (PRO_0000018520)*	SRB lab manual curation	30082873
Chondroitin sulfate	APP PFRAG1 (PRO_0000000092)*	MatrixDB	19542224
Chondroitin sulfate	COASY	SRB lab manual curation	20375348
Chondroitin sulfate	PAK1	SRB lab manual curation	20375348
Chondroitin sulfate	PTPRS	GO;UniProtKB	GO_REF:0000024
Chondroitin sulfate	DPYSL3	GO;UniProtKB	GO_REF:0000024
Chondroitin sulfate	SEMA3A	SRB lab manual curation	23940048
Chondroitin sulfate	KCNAB1	SRB lab manual curation	20375348
Chondroitin sulfate	ACOX1	SRB lab manual curation	20375348
Chondroitin sulfate	PCOLCE	MatrixDB	24117177
Chondroitin sulfate	SHH	SRB lab manual curation	24062467
Chondroitin sulfate	IGFBP7	SRB lab manual curation	12847218
Chondroitin sulfate	HADH	SRB lab manual curation	20375348
Chondroitin sulfate	PRRC2B	SRB lab manual curation	20375348
Chondroitin sulfate	NPNT	MatrixDB	23357641
Chondroitin sulfate	UNC5A	SRB lab manual curation	20375348
Chondroitin sulfate	PPP1R32	SRB lab manual curation	20375348
Chondroitin sulfate	RTN4RL1	GO;UniProtKB	GO_REF:0000024
Chondroitin sulfate	KRTAP13-1	SRB lab manual curation	20375348
Chondroitin sulfate	GADD45GIP1	SRB lab manual curation	20375348
Chondroitin sulfate	NUDT16L1	SRB lab manual curation	20375348
Chondroitin sulfate	RTN4R	GO;UniProtKB	GO_REF:0000024
Chondroitin sulfate	SEMA6B	SRB lab manual curation	20375348
Chondroitin sulfate	NTN4	SRB lab manual curation	20375348
Chondroitin sulfate	ROBO2	SRB lab manual curation	20375348
Chondroitin sulfate	HOMER2	SRB lab manual curation	20375348
Chondroitin sulfate	PLA2G3	SRB lab manual curation	9848887
Chondroitin sulfate	SLAIN2	SRB lab manual curation	20375348
Chondroitin sulfate	OPTC	SRB lab manual curation	20375348
Chondroitin sulfate	ADGRE2	GO;UniProtKB	12829604
Dermatan sulfate	LAMA1,LAMB1,LAMC1 CPX	MatrixDB	19542224
Dermatan sulfate	COL1A1,COL1A1,COL1A2 CPX	MatrixDB	19542224
Dermatan sulfate	COL4A1,COL4A1,COL4A2 CPX	MatrixDB	19542224
Dermatan sulfate	COL6A1,COL6A2,COL6A3 CPX	MatrixDB	19542224
Dermatan sulfate	SOD1	MatrixDB	3223905
Dermatan sulfate	APOE	MatrixDB;Dataset PMID:24246365	10526164
Dermatan sulfate	SLPI	MatrixDB	9593692
Dermatan sulfate	THBS1	MatrixDB	19542224
Dermatan sulfate	SPARC	MatrixDB	19542224
Dermatan sulfate	CCL2	Dataset PMID:24246365	20097750
Dermatan sulfate	TGM2	SRB lab manual curation	28199387
Dermatan sulfate	TNC	MatrixDB	7533163
Dermatan sulfate	CTSK	SRB lab manual curation	25422423;14645229
Dermatan sulfate	TNFAIP6	Dataset PMID:29362135	19729381
Dermatan sulfate	COL18A1 PFRAG1 (PRO_0000005794)*	MatrixDB	19542224
Dermatan sulfate	LOX PFRAG (PRO_0000018520)*	SRB lab manual curation	30082873
Dermatan sulfate	APP PFRAG1 (PRO_0000000092)*	MatrixDB	19542224
Dermatan sulfate	PCOLCE	MatrixDB	24117177
Dermatan sulfate	IGFBP7	SRB lab manual curation	12847218
Heparin/Heparan sulfate	LAMA1,LAMB1,LAMC1 CPX	MatrixDB;Dataset PMID:24246365	19542224;9949192
Heparin/Heparan sulfate	COL3A1,COL3A1,COL3A1 CPX	MatrixDB	2524477
Heparin/Heparan sulfate	HPSE,HPSE CPX	MatrixDB	26575439
Heparin/Heparan sulfate	COL12A1,COL12A1,COL12A1 CPX	MatrixDB	7642694
Heparin/Heparan sulfate	TNFRSF11B,TNFRSF11B CPX	SRB lab manual curation	15799029
Heparin/Heparan sulfate	COL13A1,COL13A1,COL13A1 CPX	MatrixDB	11956183
Heparin/Heparan sulfate	COL14A1,COL14A1,COL14A1 CPX	MatrixDB	11098058
Heparin/Heparan sulfate	ITGA5,ITGB1 CPX	MatrixDB	19502598;19542224
Heparin/Heparan sulfate	ITGAV,ITGB3 CPX	MatrixDB	19502598
Heparin/Heparan sulfate	ITGAV,ITGB5 CPX	MatrixDB	19502598
Heparin/Heparan sulfate	LAMA1,LAMB1,LAMC1,NID1 CPX	Dataset PMID:24246365	2303489
Heparin/Heparan sulfate	FGA,FGA,FGB,FGB,FGG,FGG CPX	Dataset PMID:24246365	12820880
Heparin/Heparan sulfate	ITGA2B,ITGB3 CPX	Dataset PMID:24246365;SRB lab manual curation	22197178;11241131
Heparin/Heparan sulfate	ITGA4,ITGB1 CPX	Dataset PMID:24246365	19888514
Heparin/Heparan sulfate	COL1A1,COL1A1,COL1A2 CPX	MatrixDB	2524477;19542224
Heparin/Heparan sulfate	COL4A1,COL4A1,COL4A2 CPX	MatrixDB	19542224
Heparin/Heparan sulfate	COL5A1,COL5A1,COL5A2 CPX	MatrixDB	2524477;9614116
Heparin/Heparan sulfate	COL5A1,COL5A2,COL5A3 CPX	MatrixDB	9614116
Heparin/Heparan sulfate	COL5A1,COL5A1,COL5A1 CPX	MatrixDB	9614116;16815843
Heparin/Heparan sulfate	COL23A1,COL23A1,COL23A1 CPX	MatrixDB	12644459
Heparin/Heparan sulfate	THBS1,THBS1,THBS1 CPX	Dataset PMID:24246365	2659597;2961064;9949192
Heparin/Heparan sulfate	COL9A1,COL9A2,COL9A3 CPX	Dataset PMID:24246365	15047691
Heparin/Heparan sulfate	THBS4,THBS4,THBS4,THBS4,THBS4 CPX	SRB lab manual curation	10956668
Heparin/Heparan sulfate	COMP,COMP,COMP,COMP,COMP CPX	Dataset PMID:24246365	17588949
Heparin/Heparan sulfate	COL2A1,COL11A1,COL11A2 CPX	MatrixDB	19542224
Heparin/Heparan sulfate	COL6A1,COL6A2,COL6A3 CPX	MatrixDB	2524477;19542224
Heparin/Heparan sulfate	VEGFA,VEGFA CPX	GO	21658003
Heparin/Heparan sulfate	C1QA,C1QA,C1QA,C1QA,C1QA,C1QA,C1QB,C1QB,C1QB,C1QB,C1QB,C1QB,C1QC,C1QC,C1QC,C1QC,C1QC,C1QC CPX	Dataset PMID:24246365	20548024
Heparin/Heparan sulfate	C1QA,C1QB,C1QC,C1R,C1S CPX	Dataset PMID:24246365	16125850;19389385
Heparin/Heparan sulfate	C4A,C4A,C4A CPX	Dataset PMID:24246365	16125850;19389385
Heparin/Heparan sulfate	C8A,C8B,C8G CPX	Dataset PMID:24246365	16125850;19389385
Heparin/Heparan sulfate	F8,VWF CPX	Dataset PMID:24246365	11278379
Heparin/Heparan sulfate	CCL24	Dataset PMID:21454685	12731055
Heparin/Heparan sulfate	LGALS9	MatrixDB	21454685
Heparin/Heparan sulfate	AGRP	Dataset PMID:21454685	11461706
Heparin/Heparan sulfate	TNFRSF11B	Dataset PMID:24246365	16828054
Heparin/Heparan sulfate	POLRMT	SRB lab manual curation	27903899
Heparin/Heparan sulfate	MANBA	SRB lab manual curation	DOI: 10.1016/j.smallrumres.2013.01.005
Heparin/Heparan sulfate	AGRN	GO;UniProtKB	8607994
Heparin/Heparan sulfate	CCL21	Dataset PMID:21454685	11286540
Heparin/Heparan sulfate	CYR61	Dataset PMID:21454685;GO;UniProtKB	1782153
Heparin/Heparan sulfate	CCL22	Dataset PMID:21454685	9151897
Heparin/Heparan sulfate	NCAN	MatrixDB	19576282
Heparin/Heparan sulfate	CXCL11	MatrixDB;Dataset PMID:21454685;GO	27044744;18645041;18411283
Heparin/Heparan sulfate	ENPP3	MatrixDB	21454685
Heparin/Heparan sulfate	PDCD5	Dataset PMID:24246365;Dataset PMID:21454685	17165023;17257606
Heparin/Heparan sulfate	NRP1	Dataset PMID:21454685;GO;UniProtKB	17405859;17989695
Heparin/Heparan sulfate	HS3ST1	SRB lab manual curation	22431632
Heparin/Heparan sulfate	MSTN	GO;UniProtKB	GO_REF:0000107
Heparin/Heparan sulfate	NCR3	Dataset PMID:24246365	18006589;19196184
Heparin/Heparan sulfate	ADAMTS3	GO;UniProtKB	GO_REF:0000037
Heparin/Heparan sulfate	GPR182	MatrixDB	21454685
Heparin/Heparan sulfate	LAMA5	MatrixDB;Dataset PMID:24246365	11304538;10799535;11098055
Heparin/Heparan sulfate	SLC22A1	MatrixDB	21454685
Heparin/Heparan sulfate	CCL25	Dataset PMID:21454685	18030990
Heparin/Heparan sulfate	FGF10	Dataset PMID:21454685;GO;SRB lab manual curation	9582367;11923311;27030175
Heparin/Heparan sulfate	FGF16	Dataset PMID:21454685	18835578
Heparin/Heparan sulfate	DHH	Dataset PMID:24246365	17348690
Heparin/Heparan sulfate	ZNF207	GO	GO_REF:0000107
Heparin/Heparan sulfate	SYNGR1	MatrixDB	21454685
Heparin/Heparan sulfate	CXCL13	Dataset PMID:21454685;GO	18030990;11708770
Heparin/Heparan sulfate	FGF17	Dataset PMID:21454685;SRB lab manual curation	18835578;27030175
Heparin/Heparan sulfate	NRP2	GO;UniProtKB	GO_REF:0000037
Heparin/Heparan sulfate	GREM1	Dataset PMID:24246365	21921258
Heparin/Heparan sulfate	SLIT1	Dataset PMID:21454685	17062560
Heparin/Heparan sulfate	PSIP1	Dataset PMID:24246365	22223757
Heparin/Heparan sulfate	GPX5	SRB lab manual curation	DOI: 10.1016/j.smallrumres.2013.01.005
Heparin/Heparan sulfate	ATRN	MatrixDB	21454685
Heparin/Heparan sulfate	TNFSF13	Dataset PMID:21454685	15846369
Heparin/Heparan sulfate	CPD	MatrixDB	21454685
Heparin/Heparan sulfate	NCR1	Dataset PMID:24246365	16262248;18006589;19196184
Heparin/Heparan sulfate	WISP2	GO	PAINT_REF:11348
Heparin/Heparan sulfate	FGF18	MatrixDB;Dataset PMID:21454685	21454685;18835578
Heparin/Heparan sulfate	ECM2	GO	PAINT_REF:24373
Heparin/Heparan sulfate	SLIT2	Dataset PMID:21454685;GO;UniProtKB;Dataset PMID:24246365	17317573;17062560;19498462;15063764
Heparin/Heparan sulfate	GLCE	SRB lab manual curation	25568314
Heparin/Heparan sulfate	ABCC6	MatrixDB	21454685
Heparin/Heparan sulfate	ABCB11	MatrixDB	21454685
Heparin/Heparan sulfate	WISP1	GO	PAINT_REF:11348
Heparin/Heparan sulfate	WISP3	GO	PAINT_REF:11348
Heparin/Heparan sulfate	ADGRL2	MatrixDB	21454685
Heparin/Heparan sulfate	NTN1	Dataset PMID:24246365;Dataset PMID:21454685	10799289
Heparin/Heparan sulfate	FGF19	UniProtKB	22396159
Heparin/Heparan sulfate	MPIG6B	Dataset PMID:21454685;GO;UniProtKB	15848171
Heparin/Heparan sulfate	NCR2	Dataset PMID:24246365	17536787;19196184
Heparin/Heparan sulfate	SOD1	MatrixDB;Dataset PMID:24246365	3223905;11863456
Heparin/Heparan sulfate	CP	MatrixDB	21454685
Heparin/Heparan sulfate	F8	Dataset PMID:24246365	11278379
Heparin/Heparan sulfate	PGK1	SRB lab manual curation	DOI: 10.1016/j.smallrumres.2013.01.005
Heparin/Heparan sulfate	F2	MatrixDB;Dataset PMID:24246365;Dataset PMID:21454685;GO;SRB lab manual curation	2007587;9949192;11412111;20421939;15548541;15311268;15311269;16973611;21454685
Heparin/Heparan sulfate	HP	MatrixDB	21454685
Heparin/Heparan sulfate	HPR	MatrixDB	21454685
Heparin/Heparan sulfate	F9	Dataset PMID:24246365;Dataset PMID:21454685	11412111;15736971
Heparin/Heparan sulfate	F10	Dataset PMID:24246365;Dataset PMID:21454685	11412111;10652320
Heparin/Heparan sulfate	CFD	Dataset PMID:21454685	8487783
Heparin/Heparan sulfate	PLG	MatrixDB	21454685
Heparin/Heparan sulfate	F12	Dataset PMID:24246365;Dataset PMID:21454685	11412111;19389385
Heparin/Heparan sulfate	PLAU	Dataset PMID:24246365;Dataset PMID:21454685	9949192;1510944
Heparin/Heparan sulfate	PLAT	Dataset PMID:21454685	1830477
Heparin/Heparan sulfate	CFB	Dataset PMID:24246365;Dataset PMID:21454685	16125850
Heparin/Heparan sulfate	SERPINC1	MatrixDB;Dataset PMID:24246365;Dataset PMID:21454685;GO;UniProtKB;SRB lab manual curation	7287752;11135627;1901416;8343518;9763552;9949192;15371417;16004430;19034645;19389385;15311269;7287751;9405673;12873131;15311268;16973611
Heparin/Heparan sulfate	SERPINA1	MatrixDB	21454685
Heparin/Heparan sulfate	AGT	MatrixDB	21454685
Heparin/Heparan sulfate	A2M	MatrixDB;SRB lab manual curation	21454685;DOI: 10.1016/j.smallrumres.2013.01.005
Heparin/Heparan sulfate	C3	Dataset PMID:24246365;Dataset PMID:21454685	16125850;19389385
Heparin/Heparan sulfate	C5	Dataset PMID:24246365;Dataset PMID:21454685	16125850;19389385
Heparin/Heparan sulfate	KNG1	Dataset PMID:24246365;Dataset PMID:21454685;GO	10819977;19389385;12911595
Heparin/Heparan sulfate	PDGFB	Dataset PMID:21454685	9677323
Heparin/Heparan sulfate	LDLR	MatrixDB	21454685
Heparin/Heparan sulfate	TGFB1	Dataset PMID:21454685	9218427
Heparin/Heparan sulfate	NGF	Dataset PMID:24246365	1901416
Heparin/Heparan sulfate	PRL	Dataset PMID:21454685	9927340
Heparin/Heparan sulfate	TG	Dataset PMID:24246365;Dataset PMID:21454685	11916630
Heparin/Heparan sulfate	TNF	Dataset PMID:21454685	18424242
Heparin/Heparan sulfate	IFNG	MatrixDB;Dataset PMID:24246365;Dataset PMID:21454685	7654188;1901275
Heparin/Heparan sulfate	PIGR	MatrixDB	21454685
Heparin/Heparan sulfate	COL1A1	Dataset PMID:21454685	9636139
Heparin/Heparan sulfate	COL2A1	MatrixDB;Dataset PMID:21454685	3691037;3011107
Heparin/Heparan sulfate	COL3A1	Dataset PMID:21454685	3691037
Heparin/Heparan sulfate	COL4A1	Dataset PMID:21454685	2914908
Heparin/Heparan sulfate	APOE	MatrixDB;Dataset PMID:24246365;Dataset PMID:21454685;GO;UniProtKB	10526164;2745454;7683668;8300609;15583000;2418019;21454685
Heparin/Heparan sulfate	FGA	MatrixDB	21454685
Heparin/Heparan sulfate	FGB	MatrixDB;Dataset PMID:21454685	21454685;12820880
Heparin/Heparan sulfate	FGG	MatrixDB	21454685
Heparin/Heparan sulfate	SLC4A1	MatrixDB	21454685
Heparin/Heparan sulfate	APCS	Dataset PMID:24246365;Dataset PMID:21454685	12071948;2948956
Heparin/Heparan sulfate	C1QA	Dataset PMID:21454685;SRB lab manual curation	16125850;20548024
Heparin/Heparan sulfate	C1QB	Dataset PMID:21454685;SRB lab manual curation	16125850;20548024
Heparin/Heparan sulfate	C1QC	MatrixDB;Dataset PMID:21454685;SRB lab manual curation	21454685;16125850;20548024
Heparin/Heparan sulfate	C9	Dataset PMID:24246365;Dataset PMID:21454685	16125850;19389385
Heparin/Heparan sulfate	APOH	Dataset PMID:24246365;Dataset PMID:21454685;GO;UniProtKB	10229659;11711550
Heparin/Heparan sulfate	FN1	MatrixDB;Dataset PMID:24246365;Dataset PMID:21454685;GO;UniProtKB	2524477;19542224;22442151;24148804;10075919;1400330;11956183;18243143;25034023;1901416;3567152;9949192;2524477;8760376;11246004;12377765;21454685
Heparin/Heparan sulfate	AMBP	MatrixDB	21454685
Heparin/Heparan sulfate	TTR	Dataset PMID:24246365	21422279
Heparin/Heparan sulfate	ALB	Dataset PMID:24246365	1901416
Heparin/Heparan sulfate	GC	MatrixDB	21454685
Heparin/Heparan sulfate	PPBP	Dataset PMID:24246365;Dataset PMID:21454685	7922353
Heparin/Heparan sulfate	PF4	MatrixDB;Dataset PMID:24246365;Dataset PMID:21454685;GO;UniProtKB	9252363;2409923;7922353;8526843;8613703;9395524;10212210;17915935;19034645;19389385;9531587;19567366
Heparin/Heparan sulfate	CXCL10	Dataset PMID:21454685;GO	12571234;18645041
Heparin/Heparan sulfate	TFRC	MatrixDB	21454685
Heparin/Heparan sulfate	TF	MatrixDB	21454685
Heparin/Heparan sulfate	LTF	Dataset PMID:21454685;GO;UniProtKB;SRB lab manual curation	12646274;11907569;DOI: 10.1016/j.smallrumres.2013.01.005
Heparin/Heparan sulfate	ANG	Dataset PMID:21454685;GO	9092516;10103013
Heparin/Heparan sulfate	F11	Dataset PMID:24246365;Dataset PMID:21454685;GO;UniProtKB	11412111;9632702
Heparin/Heparan sulfate	KLKB1	Dataset PMID:24246365	19389385
Heparin/Heparan sulfate	SLPI	MatrixDB;Dataset PMID:24246365;Dataset PMID:21454685	1525165;9593692
Heparin/Heparan sulfate	C4BPA	Dataset PMID:21454685	2136880
Heparin/Heparan sulfate	VTN	Dataset PMID:24246365;Dataset PMID:21454685;GO;UniProtKB	9054371;11437360;20600001;9572850
Heparin/Heparan sulfate	PROC	Dataset PMID:24246365;Dataset PMID:21454685	11412111;10456457
Heparin/Heparan sulfate	ANXA1	MatrixDB	21454685
Heparin/Heparan sulfate	PDGFA	MatrixDB;Dataset PMID:21454685	9038157;8810913
Heparin/Heparan sulfate	APOB	MatrixDB;Dataset PMID:21454685;GO;UniProtKB	3301850;10608816;16233946;9637699;21454685
Heparin/Heparan sulfate	CSF2	MatrixDB;Dataset PMID:21454685	16027123
Heparin/Heparan sulfate	PRNP	Dataset PMID:21454685;UniProtKB	11882649
Heparin/Heparan sulfate	HRG	Dataset PMID:24246365;Dataset PMID:21454685;GO;UniProtKB	3584128;6833231;16436387;21304106;19712047;15138272;6415849
Heparin/Heparan sulfate	A1BG	MatrixDB	21454685
Heparin/Heparan sulfate	VWF	Dataset PMID:24246365;Dataset PMID:21454685	11278379;1577724
Heparin/Heparan sulfate	ERBB2	MatrixDB	21454685
Heparin/Heparan sulfate	WNT1	Dataset PMID:21454685	8909553
Heparin/Heparan sulfate	ATP1A1	MatrixDB	21454685
Heparin/Heparan sulfate	ATP1B1	MatrixDB	21454685
Heparin/Heparan sulfate	APP	MatrixDB;Dataset PMID:24246365;Dataset PMID:21454685;GO;UniProtKB	7929392;7982489;20212142;9048763
Heparin/Heparan sulfate	ARG1	MatrixDB	21454685
Heparin/Heparan sulfate	ITGB3	Dataset PMID:21454685	19502598
Heparin/Heparan sulfate	IL4	Dataset PMID:21454685	9071560
Heparin/Heparan sulfate	IL5	MatrixDB;Dataset PMID:21454685	9500522
Heparin/Heparan sulfate	SERPINE1	MatrixDB;Dataset PMID:21454685	1703436;1375944
Heparin/Heparan sulfate	SERPINA5	Dataset PMID:21454685;GO;UniProtKB;SRB lab manual curation	1315738;11120760;18974053;18362344
Heparin/Heparan sulfate	SERPING1	MatrixDB;Dataset PMID:24246365;Dataset PMID:21454685	9882449;16125850;20351192
Heparin/Heparan sulfate	CFI	Dataset PMID:24246365;Dataset PMID:21454685	16125850
Heparin/Heparan sulfate	MPO	GO	11907569
Heparin/Heparan sulfate	FGF1	MatrixDB;Dataset PMID:24246365;Dataset PMID:21454685;GO;UniProtKB;SRB lab manual curation	9343372;18441324;7509590;7528103;7684608;11488623;19034645;20145243;1885605;9655399;11069186;22057274;23240683
Heparin/Heparan sulfate	IL6	MatrixDB;Dataset PMID:21454685	11067924
Heparin/Heparan sulfate	CLEC3B	GO	10727405
Heparin/Heparan sulfate	SERPIND1	MatrixDB;Dataset PMID:24246365;Dataset PMID:21454685;GO;UniProtKB	12706831;15371417;19389385;1902471
Heparin/Heparan sulfate	ITGB1	Dataset PMID:21454685	19502598
Heparin/Heparan sulfate	COL5A2	UniProtKB	8982859
Heparin/Heparan sulfate	INSR	MatrixDB	21454685
Heparin/Heparan sulfate	GSN	MatrixDB	21454685
Heparin/Heparan sulfate	C2	Dataset PMID:24246365;Dataset PMID:21454685	16125850;19389385
Heparin/Heparan sulfate	S100A9	Dataset PMID:24246365	11723110
Heparin/Heparan sulfate	ENO1	MatrixDB	21454685
Heparin/Heparan sulfate	ITGAV	Dataset PMID:21454685	19502598
Heparin/Heparan sulfate	LPL	Dataset PMID:24246365;Dataset PMID:21454685;GO;UniProtKB	6882775;7717977;12573449;2110364;20124439;7868983;10085125
Heparin/Heparan sulfate	SERPINE2	Dataset PMID:21454685;GO;UniProtKB;SRB lab manual curation	1752960;1939253;3997857;9949192
Heparin/Heparan sulfate	P4HB	MatrixDB	21454685
Heparin/Heparan sulfate	CTSD	SRB lab manual curation	19919557
Heparin/Heparan sulfate	ANXA2	Dataset PMID:24246365;Dataset PMID:21454685;SRB lab manual curation	9182528;16882661
Heparin/Heparan sulfate	C8A	Dataset PMID:21454685	16125850
Heparin/Heparan sulfate	C8B	MatrixDB;Dataset PMID:21454685	21454685;16125850
Heparin/Heparan sulfate	C8G	Dataset PMID:21454685	16125850
Heparin/Heparan sulfate	PRSS1	Dataset PMID:21454685	9367173
Heparin/Heparan sulfate	CTSB	MatrixDB;Dataset PMID:21454685	11016923
Heparin/Heparan sulfate	THBS1	MatrixDB;Dataset PMID:21454685;GO;UniProtKB	18226512;19542224;101549;8288588;16407063;18065761;10734084Ê
Heparin/Heparan sulfate	GJB1	MatrixDB	21454685
Heparin/Heparan sulfate	COL1A2	Dataset PMID:21454685	9636139
Heparin/Heparan sulfate	ANXA6	MatrixDB;Dataset PMID:21454685	21454685;9545337
Heparin/Heparan sulfate	ABCB1	MatrixDB	21454685
Heparin/Heparan sulfate	SERPINA6	MatrixDB	21454685
Heparin/Heparan sulfate	SLC3A2	MatrixDB	21454685
Heparin/Heparan sulfate	ELANE	MatrixDB;Dataset PMID:24246365;Dataset PMID:21454685;GO	1869557;7961933;11907569;19251947;16866356
Heparin/Heparan sulfate	MMP2	MatrixDB;Dataset PMID:24246365;Dataset PMID:21454685	8269931;9054449;15030172;17623663
Heparin/Heparan sulfate	SOD3	MatrixDB;Dataset PMID:21454685;GO;UniProtKB	11863456;19289127
Heparin/Heparan sulfate	CTSG	MatrixDB;Dataset PMID:24246365;Dataset PMID:21454685;GO	1869557;7961933;11907569;16310171
Heparin/Heparan sulfate	INHBA	Dataset PMID:21454685	3864157
Heparin/Heparan sulfate	ITGA2B	Dataset PMID:24246365	22197178
Heparin/Heparan sulfate	LPA	GO	2531657
Heparin/Heparan sulfate	COL4A2	Dataset PMID:21454685	2914908
Heparin/Heparan sulfate	PTPRC	MatrixDB;GO	21454685
Heparin/Heparan sulfate	MET	MatrixDB	11435444;22897854
Heparin/Heparan sulfate	CFH	MatrixDB;Dataset PMID:24246365;Dataset PMID:21454685;GO;UniProtKB	15183770;16125850;22471560;24744754Ê
Heparin/Heparan sulfate	FGF4	Dataset PMID:21454685;SRB lab manual curation;GO;UniProtKB	11486033;27030175
Heparin/Heparan sulfate	ITGA5	Dataset PMID:21454685	19502598
Heparin/Heparan sulfate	IL3	Dataset PMID:21454685	10607697
Heparin/Heparan sulfate	ANXA5	Dataset PMID:24246365;Dataset PMID:21454685;SRB lab manual curation	11342135
Heparin/Heparan sulfate	RPSA	MatrixDB	21454685
Heparin/Heparan sulfate	FGF2	MatrixDB;Dataset PMID:24246365;Dataset PMID:21454685;GO;UniProtKB;SRB lab manual curation	1587820;11135627;1901416;8142385;9199199;9949192;11488623;12000311;12690039;14707131;15096041;19034645;1885605;11030354;8599088
Heparin/Heparan sulfate	MMP7	Dataset PMID:24246365;Dataset PMID:21454685;GO	10660581;19654318
Heparin/Heparan sulfate	CXCL1	Dataset PMID:24246365;Dataset PMID:21454685	7922353
Heparin/Heparan sulfate	HMGB1	Dataset PMID:24246365;Dataset PMID:21454685	21095260;1885601
Heparin/Heparan sulfate	FBP1	SRB lab manual curation	DOI: 10.1016/j.smallrumres.2013.01.005
Heparin/Heparan sulfate	SPARC	MatrixDB	19542224
Heparin/Heparan sulfate	C1S	Dataset PMID:24246365	20351192
Heparin/Heparan sulfate	FURIN	MatrixDB	21454685
Heparin/Heparan sulfate	C4A	MatrixDB;Dataset PMID:21454685	21454685;16125850
Heparin/Heparan sulfate	SAA1	GO;UniProtKB	GO_REF:0000037
Heparin/Heparan sulfate	HSPA1A	SRB lab manual curation	DOI: 10.1016/j.smallrumres.2013.01.005
Heparin/Heparan sulfate	CXCL8	MatrixDB;Dataset PMID:24246365;Dataset PMID:21454685	9624135;15183770;24501198;10504268;10961890;11814358;14997572;19034645;7922353Ê
Heparin/Heparan sulfate	CCL3	Dataset PMID:21454685;SRB lab manual curation	9092555;27091995
Heparin/Heparan sulfate	ACR	SRB lab manual curation	DOI: 10.1016/j.smallrumres.2013.01.005
Heparin/Heparan sulfate	PTPRF	GO;UniProtKB	GO_REF:0000037
Heparin/Heparan sulfate	TXN	MatrixDB	21454685
Heparin/Heparan sulfate	MAPT	Dataset PMID:21454685	17029411
Heparin/Heparan sulfate	C7	Dataset PMID:24246365;Dataset PMID:21454685	16125850;19389385
Heparin/Heparan sulfate	TFPI	Dataset PMID:24246365;Dataset PMID:21454685	11488623;11772005
Heparin/Heparan sulfate	PF4V1	GO;UniProtKB	23536183
Heparin/Heparan sulfate	FGF6	Dataset PMID:21454685;UniProtKB	1814436;27030175
Heparin/Heparan sulfate	CLU	MatrixDB;SRB lab manual curation	21454685;DOI: 10.1016/j.smallrumres.2013.01.005
Heparin/Heparan sulfate	GHR	MatrixDB	21454685
Heparin/Heparan sulfate	IAPP	Dataset PMID:21454685	16866369
Heparin/Heparan sulfate	LIPC	MatrixDB;Dataset PMID:21454685;GO;UniProtKB	21454685;2418019
Heparin/Heparan sulfate	SLC2A2	MatrixDB	21454685
Heparin/Heparan sulfate	ITGAM	Dataset PMID:21454685	7559767
Heparin/Heparan sulfate	MBL2	MatrixDB	21454685
Heparin/Heparan sulfate	FGFR1	Dataset PMID:24246365;Dataset PMID:21454685;GO;UniProtKB;SRB lab manual curation	8824259;12034712;15096041;18480409;9655399;8456318;11030354
Heparin/Heparan sulfate	FGF3	Dataset PMID:21454685;UniProtKB;SRB lab manual curation	1944270;27030175
Heparin/Heparan sulfate	FGF5	Dataset PMID:21454685;UniProtKB	8386828;2005884
Heparin/Heparan sulfate	COL11A1	Dataset PMID:24246365;Dataset PMID:21454685	15930001;11084037
Heparin/Heparan sulfate	COL6A3	MatrixDB	1425570
Heparin/Heparan sulfate	ANXA3	MatrixDB	21454685
Heparin/Heparan sulfate	BMP2	MatrixDB;Dataset PMID:24246365;Dataset PMID:21454685	8620887
Heparin/Heparan sulfate	BMP4	MatrixDB;Dataset PMID:21454685;GO	15381701;11839272
Heparin/Heparan sulfate	BMP3	Dataset PMID:21454685	3478684
Heparin/Heparan sulfate	RNASE3	Dataset PMID:24246365	18593710;20213669
Heparin/Heparan sulfate	IL7	Dataset PMID:24246365;Dataset PMID:21454685	22085638;8589262
Heparin/Heparan sulfate	CCL4	Dataset PMID:21454685	10438952
Heparin/Heparan sulfate	CCL2	MatrixDB;Dataset PMID:24246365;Dataset PMID:21454685;GO	27044744;19642141;21087715;18662971;24727473;20097750;15033992
Heparin/Heparan sulfate	CCL5	Dataset PMID:24246365;Dataset PMID:21454685;SRB lab manual curation	12475226;11116158;15530372;27091995
Heparin/Heparan sulfate	NCAM1	Dataset PMID:21454685;SRB lab manual curation	2809592;9949192
Heparin/Heparan sulfate	ATP1A3	UniProtKB
Heparin/Heparan sulfate	C6	Dataset PMID:24246365;Dataset PMID:21454685	16125850;19389385
Heparin/Heparan sulfate	PRG2	Dataset PMID:21454685;GO;UniProtKB;SRB lab manual curation	16245931
Heparin/Heparan sulfate	COL11A2	MatrixDB;Dataset PMID:21454685	3691037;11084037
Heparin/Heparan sulfate	SELL	MatrixDB;Dataset PMID:21454685;Dataset PMID:24246365;GO	7687382;17629851;7680663;9466983
Heparin/Heparan sulfate	MIF	MatrixDB	21454685
Heparin/Heparan sulfate	HGF	MatrixDB;Dataset PMID:24246365;Dataset PMID:21454685;SRB lab manual curation	8157651;9443912;14707131;17258232;11597998
Heparin/Heparan sulfate	PLA2G2A	Dataset PMID:21454685	8939951
Heparin/Heparan sulfate	MMP9	Dataset PMID:21454685	18216069
Heparin/Heparan sulfate	AKR1B1	MatrixDB	21454685
Heparin/Heparan sulfate	ELN	MatrixDB	15748998
Heparin/Heparan sulfate	VEGFA	MatrixDB;Dataset PMID:24246365;Dataset PMID:21454685;GO;UniProtKB	16258170;14707131;16014624;19034645;21658003;17626017;14570917;15001987
Heparin/Heparan sulfate	CD1D	MatrixDB	21454685
Heparin/Heparan sulfate	ST6GAL1	MatrixDB	21454685
Heparin/Heparan sulfate	SELP	MatrixDB;Dataset PMID:24246365;Dataset PMID:21454685;GO	9466983;17629851;7680663
Heparin/Heparan sulfate	PECAM1	Dataset PMID:21454685	18327914
Heparin/Heparan sulfate	CD36	MatrixDB	21454685
Heparin/Heparan sulfate	BPI	Dataset PMID:24246365	8294435
Heparin/Heparan sulfate	IGFBP3	Dataset PMID:24246365;Dataset PMID:21454685	15691886
Heparin/Heparan sulfate	FLT1	Dataset PMID:21454685	9633524
Heparin/Heparan sulfate	IGFBP2	Dataset PMID:21454685	17020769
Heparin/Heparan sulfate	BMP7	MatrixDB;Dataset PMID:21454685;GO	12927798
Heparin/Heparan sulfate	LBP	Dataset PMID:24246365	15699163
Heparin/Heparan sulfate	NCL	MatrixDB	17615292;19877579
Heparin/Heparan sulfate	AOC1	Dataset PMID:21454685;GO;UniProtKB	10681052;12072962;19764817
Heparin/Heparan sulfate	CEL	GO	7578248
Heparin/Heparan sulfate	CXCL2	Dataset PMID:21454685	2643119
Heparin/Heparan sulfate	FST	Dataset PMID:24246365;Dataset PMID:21454685;UniProtKB;GO	17409095;12867435;1918055;1301390
Heparin/Heparan sulfate	ATP2B1	MatrixDB	21454685
Heparin/Heparan sulfate	AZU1	Dataset PMID:21454685;GO;UniProtKB	11994286;15879141
Heparin/Heparan sulfate	TPSB2	Dataset PMID:21454685	15567416
Heparin/Heparan sulfate	EFNA1	Dataset PMID:21454685	17317573
Heparin/Heparan sulfate	COL9A1	MatrixDB;Dataset PMID:24246365;Dataset PMID:21454685	15047691
Heparin/Heparan sulfate	COL5A1	MatrixDB;Dataset PMID:24246365;Dataset PMID:21454685;GO;UniProtKB	9614116;16815843;2203476
Heparin/Heparan sulfate	MAG	SRB lab manual curation	2446864
Heparin/Heparan sulfate	PTN	Dataset PMID:24246365;Dataset PMID:21454685;GO;UniProtKB	10413105;16155004;17607711;10788472;1733956
Heparin/Heparan sulfate	ABCB4	MatrixDB	21454685
Heparin/Heparan sulfate	NT5E	MatrixDB	21454685
Heparin/Heparan sulfate	MDK	Dataset PMID:24246365;Dataset PMID:21454685;GO;UniProtKB	10978312;9384573
Heparin/Heparan sulfate	FGF7	Dataset PMID:21454685;GO;UniProtKB	9636026
Heparin/Heparan sulfate	FGFR2	MatrixDB;Dataset PMID:24246365;Dataset PMID:21454685;GO;UniProtKB;SRB lab manual curation	12034712;11069186
Heparin/Heparan sulfate	COMT	MatrixDB	21454685
Heparin/Heparan sulfate	TGM2	MatrixDB;Dataset PMID:24246365;Dataset PMID:21454685	15935280;19542224;22442151;19398782;22447354
Heparin/Heparan sulfate	BMP6	Dataset PMID:24246365;Dataset PMID:21454685	14707131
Heparin/Heparan sulfate	LPO	SRB lab manual curation	DOI: 10.1016/j.smallrumres.2013.01.005
Heparin/Heparan sulfate	TNXB	MatrixDB;GO	7512972;11278641
Heparin/Heparan sulfate	IL10	MatrixDB;Dataset PMID:24246365;Dataset PMID:21454685	10961890
Heparin/Heparan sulfate	CCL1	Dataset PMID:21454685	1557400
Heparin/Heparan sulfate	ENPP1	MatrixDB	21454685
Heparin/Heparan sulfate	FGFR4	MatrixDB;Dataset PMID:24246365;Dataset PMID:21454685;GO;UniProtKB	11278860;18480409
Heparin/Heparan sulfate	FGFR3	Dataset PMID:21454685;UniProtKB	14732692;11134040
Heparin/Heparan sulfate	IGFBP4	Dataset PMID:21454685	15735305
Heparin/Heparan sulfate	PPIB	Dataset PMID:21454685	15109301
Heparin/Heparan sulfate	ANOS1	MatrixDB;Dataset PMID:24246365;Dataset PMID:21454685;GO;UniProtKB	19696444;15324302
Heparin/Heparan sulfate	CMA1	Dataset PMID:21454685	8182050
Heparin/Heparan sulfate	LAMA2	MatrixDB;Dataset PMID:21454685	11304538;10022829
Heparin/Heparan sulfate	IGFBP6	Dataset PMID:21454685	9165012
Heparin/Heparan sulfate	IGFBP5	Dataset PMID:24246365;Dataset PMID:21454685	15691886;8626396
Heparin/Heparan sulfate	TNC	Dataset PMID:24246365;Dataset PMID:21454685	15069070
Heparin/Heparan sulfate	MYL9	Dataset PMID:21454685	1471071
Heparin/Heparan sulfate	LAMA1	Dataset PMID:24246365;Dataset PMID:21454685	2303489;10893232;11098055;11304538;10022829
Heparin/Heparan sulfate	ATP5F1A	Dataset PMID:21454685	15710745
Heparin/Heparan sulfate	COL5A3	GO	GO_REF:0000107
Heparin/Heparan sulfate	PTX3	MatrixDB	19050261
Heparin/Heparan sulfate	PON1	MatrixDB	21454685
Heparin/Heparan sulfate	DPP4	MatrixDB	21454685
Heparin/Heparan sulfate	CFP	Dataset PMID:24246365;Dataset PMID:21454685	16125850
Heparin/Heparan sulfate	GRN	MatrixDB	19755719
Heparin/Heparan sulfate	PCSK6	Dataset PMID:21454685;GO	12535616
Heparin/Heparan sulfate	CTGF	Dataset PMID:21454685;GO;UniProtKB	9242708
Heparin/Heparan sulfate	IL12B	Dataset PMID:21454685	9916734
Heparin/Heparan sulfate	SERPINA4	Dataset PMID:24246365	11016932
Heparin/Heparan sulfate	AQP1	MatrixDB	21454685
Heparin/Heparan sulfate	PEBP1	MatrixDB	21454685
Heparin/Heparan sulfate	LRPAP1	MatrixDB;Dataset PMID:21454685;GO;UniProtKB	21454685;11382778
Heparin/Heparan sulfate	FGF9	Dataset PMID:21454685;GO;UniProtKB	11223514
Heparin/Heparan sulfate	L1CAM	Dataset PMID:24246365	9949192
Heparin/Heparan sulfate	BTC	Dataset PMID:21454685	17673511
Heparin/Heparan sulfate	ADRA1B	MatrixDB;GO;UniProtKB	21454685
Heparin/Heparan sulfate	THBS2	Dataset PMID:21454685;GO;UniProtKB	7798222
Heparin/Heparan sulfate	THBS4	Dataset PMID:21454685;GO	7852353
Heparin/Heparan sulfate	IDUA	UniProtKB	2917561
Heparin/Heparan sulfate	FBN1	MatrixDB;Dataset PMID:24246365;Dataset PMID:21454685;GO;UniProtKB	12837131;15980072;11461921;25034023
Heparin/Heparan sulfate	FBN2	MatrixDB;Dataset PMID:21454685	12837131
Heparin/Heparan sulfate	TIMP3	MatrixDB	10900194
Heparin/Heparan sulfate	ATP7B	MatrixDB	21454685
Heparin/Heparan sulfate	KDR	Dataset PMID:21454685	9386990
Heparin/Heparan sulfate	SLC16A2	MatrixDB	21454685
Heparin/Heparan sulfate	SERPINF1	Dataset PMID:24246365;Dataset PMID:21454685	8976566;12641447
Heparin/Heparan sulfate	SNCA	Dataset PMID:21454685	11814343
Heparin/Heparan sulfate	SPAM1	SRB lab manual curation	DOI: 10.1016/j.smallrumres.2013.01.005
Heparin/Heparan sulfate	COL18A1	Dataset PMID:21454685;UniProtKB	14585835
Heparin/Heparan sulfate	PLA2G5	GO	GO_REF:0000107
Heparin/Heparan sulfate	GDNF	Dataset PMID:21454685	17298301
Heparin/Heparan sulfate	ASIP	Dataset PMID:21454685	11461706
Heparin/Heparan sulfate	LIFR	MatrixDB	21454685
Heparin/Heparan sulfate	ECE1	MatrixDB	21454685
Heparin/Heparan sulfate	PAFAH1B1	GO	8028668
Heparin/Heparan sulfate	DCC	Dataset PMID:21454685	9341129
Heparin/Heparan sulfate	CTSK	SRB lab manual curation	14645229
Heparin/Heparan sulfate	SLCO1A2	MatrixDB	21454685
Heparin/Heparan sulfate	RPL29	Dataset PMID:24246365;Dataset PMID:21454685;GO;UniProtKB	16004430;8662616
Heparin/Heparan sulfate	XDH	Dataset PMID:24246365;Dataset PMID:21454685	9056242;8424793
Heparin/Heparan sulfate	XCL1	Dataset PMID:24246365;Dataset PMID:21454685	14707146
Heparin/Heparan sulfate	CXCL12	MatrixDB;Dataset PMID:24246365;Dataset PMID:21454685;UniProtKB;SRB lab manual curation	10446158;11087743;15292258;17264079
Heparin/Heparan sulfate	NOV	GO	PAINT_REF:11348
Heparin/Heparan sulfate	THBS3	Dataset PMID:21454685;GO	8288588
Heparin/Heparan sulfate	COMP	Dataset PMID:21454685;GO;UniProtKB	17588949
Heparin/Heparan sulfate	PGF	Dataset PMID:21454685;GO;UniProtKB	8148155
Heparin/Heparan sulfate	VEGFB	Dataset PMID:21454685;GO;UniProtKB	10409677
Heparin/Heparan sulfate	PSEN1	MatrixDB	21454685
Heparin/Heparan sulfate	SELENOP	Dataset PMID:24246365	10782998
Heparin/Heparan sulfate	CAMP	SRB lab manual curation	DOI: 10.1016/j.smallrumres.2013.01.005
Heparin/Heparan sulfate	MMP14	MatrixDB	21454685
Heparin/Heparan sulfate	CCL11	Dataset PMID:24246365;Dataset PMID:21454685	17384413
Heparin/Heparan sulfate	APLP1	MatrixDB;Dataset PMID:21454685;GO;UniProtKB;SRB lab manual curation	7929392;21574595;21930949;25760599
Heparin/Heparan sulfate	HDGF	Dataset PMID:24246365;Dataset PMID:21454685;GO;UniProtKB;SRB lab manual curation	22223757;15491618;17270212;7929202
Heparin/Heparan sulfate	PRELP	MatrixDB;Dataset PMID:24246365;Dataset PMID:21454685;GO;UniProtKB	11007795;11847210
Heparin/Heparan sulfate	SLC7A2	MatrixDB	21454685
Heparin/Heparan sulfate	EFNA3	Dataset PMID:21454685	18715996
Heparin/Heparan sulfate	EFNA5	Dataset PMID:21454685	17317573
Heparin/Heparan sulfate	NDST1	UniProtKB	15253930
Heparin/Heparan sulfate	SLC16A1	MatrixDB	21454685
Heparin/Heparan sulfate	ATP1B3	MatrixDB	21454685
Heparin/Heparan sulfate	FGF8	Dataset PMID:21454685;UniProtKB	12077148;25772309
Heparin/Heparan sulfate	CDH8	MatrixDB	21454685
Heparin/Heparan sulfate	CCL23	Dataset PMID:21454685;GO;UniProtKB	11060285
Heparin/Heparan sulfate	FCGRT	MatrixDB	21454685
Heparin/Heparan sulfate	ITGA1	MatrixDB	21454685
Heparin/Heparan sulfate	BACE1	Dataset PMID:21454685	14530380
Heparin/Heparan sulfate	BACE1 chain	Dataset PMID:24246365	18322391
Heparin/Heparan sulfate	HSD17B7	MatrixDB	21454685
Heparin/Heparan sulfate	EVA1C	GO	19470522
Heparin/Heparan sulfate	TPPP2	SRB lab manual curation	DOI: 10.1016/j.smallrumres.2013.01.005
Heparin/Heparan sulfate	IL2	Dataset PMID:21454685	9597549
Heparin/Heparan sulfate	FGF12	Dataset PMID:21454685;GO	12815063
Heparin/Heparan sulfate	B2M	Dataset PMID:24246365	11818700;15689502
Heparin/Heparan sulfate	TGFB2	Dataset PMID:21454685	9218427
Heparin/Heparan sulfate	CX3CL1	Dataset PMID:21454685	10770945
Heparin/Heparan sulfate	CCL8	Dataset PMID:24246365;Dataset PMID:21454685;GO;UniProtKB	19034645;16033763
Heparin/Heparan sulfate	CCL7	MatrixDB;Dataset PMID:21454685;GO;UniProtKB	27044744;10504268
Heparin/Heparan sulfate	CXCL6	Dataset PMID:21454685;GO;UniProtKB	9225113
Heparin/Heparan sulfate	TNFAIP6	MatrixDB;Dataset PMID:24246365;Dataset PMID:29362135	15183770;27044744;15917224
Heparin/Heparan sulfate	HSPG2	MatrixDB;UniProtKB	19019854;9431988;10092882
Heparin/Heparan sulfate	CYCS	Dataset PMID:21454685	8280115
Heparin/Heparan sulfate	COL18A1 PFRAG1 (PRO_0000005794)*	MatrixDB;Dataset PMID:24246365	9687493;14585835;19542224;12812520Ê
Heparin/Heparan sulfate	MMP2 PFRAG (PRO_0000391626)*	MatrixDB	9054449
Heparin/Heparan sulfate	APP PFRAG1 (PRO_0000000092)*	MatrixDB	19542224;28106549
Heparin/Heparan sulfate	COL5A1 PFRAG (HepV)	MatrixDB	9614116;10862775;16815843
Heparin/Heparan sulfate	COL18A1 PFRAG2 (PRO_0000441861)*	MatrixDB	9687493
Heparin/Heparan sulfate	XCL1 PFRAG (PRO_0000005248)*	MatrixDB	26836755
Heparin/Heparan sulfate	TFAM	SRB lab manual curation	27903899
Heparin/Heparan sulfate	SORD	SRB lab manual curation	DOI: 10.1016/j.smallrumres.2013.01.005
Heparin/Heparan sulfate	DEFA5	Dataset PMID:24246365	19654318
Heparin/Heparan sulfate	NRG1	MatrixDB;Dataset PMID:24246365;Dataset PMID:21454685	15528194;9566971;21536100
Heparin/Heparan sulfate	HIST1H1A	GO	GO_REF:0000107
Heparin/Heparan sulfate	TGFBR3	GO	1333192
Heparin/Heparan sulfate	COL14A1	Dataset PMID:21454685	10350466
Heparin/Heparan sulfate	ITIH3	MatrixDB	21454685
Heparin/Heparan sulfate	APLP2	MatrixDB;Dataset PMID:21454685;GO;UniProtKB	7929392
Heparin/Heparan sulfate	BSPH1	GO	PAINT_REF:22918
Heparin/Heparan sulfate	LRP1	MatrixDB;GO;UniProtKB	17326667;21289173;22467855
Heparin/Heparan sulfate	SLC20A2	MatrixDB	21454685
Heparin/Heparan sulfate	CD47	MatrixDB	21454685
Heparin/Heparan sulfate	FSTL1	Dataset PMID:21454685;GO;UniProtKB	7957230
Heparin/Heparan sulfate	AIMP1	Dataset PMID:21454685	15710745
Heparin/Heparan sulfate	PRDX4	MatrixDB	21454685
Heparin/Heparan sulfate	NOG	Dataset PMID:21454685	11706034
Heparin/Heparan sulfate	DMP1	SRB lab manual curation	DOI: 10.1016/j.smallrumres.2013.01.005
Heparin/Heparan sulfate	PTPRS	GO;UniProtKB	21454754
Heparin/Heparan sulfate	STIM1	MatrixDB	21454685
Heparin/Heparan sulfate	SEMA5A	Dataset PMID:21454685;UniProtKB	15603739;23940048
Heparin/Heparan sulfate	PTCH1	GO	GO_REF:0000107
Heparin/Heparan sulfate	AAMP	Dataset PMID:21454685;GO	7743515
Heparin/Heparan sulfate	CACNA1S	Dataset PMID:21454685	2162834
Heparin/Heparan sulfate	LAMC2	GO;UniProtKB	GO_REF:0000037
Heparin/Heparan sulfate	FGFBP1	Dataset PMID:21454685;GO	9784842;1885605
Heparin/Heparan sulfate	SCN5A	MatrixDB	21454685
Heparin/Heparan sulfate	IHH	Dataset PMID:21454685	17348690
Heparin/Heparan sulfate	LTBP1	Dataset PMID:24246365;Dataset PMID:21454685	20699357;17580303
Heparin/Heparan sulfate	LTBP2	MatrixDB;Dataset PMID:24246365;GO;UniProtKB	20382221
Heparin/Heparan sulfate	GPNMB	GO	19350579
Heparin/Heparan sulfate	SLC10A1	MatrixDB	21454685
Heparin/Heparan sulfate	COL19A1	Dataset PMID:21454685	12788917
Heparin/Heparan sulfate	POSTN	GO;UniProtKB	GO_REF:0000024
Heparin/Heparan sulfate	ZNF146	GO	8665923
Heparin/Heparan sulfate	PDIA6	MatrixDB	21454685
Heparin/Heparan sulfate	AGER	GO	GO_REF:0000107
Heparin/Heparan sulfate	PCOLCE	MatrixDB;Dataset PMID:24246365;GO	24117177;20729553;12393877
Heparin/Heparan sulfate	PON2	MatrixDB	21454685
Heparin/Heparan sulfate	PON3	MatrixDB	21454685
Heparin/Heparan sulfate	SHH	Dataset PMID:24246365;Dataset PMID:21454685;UniProtKB;SRB lab manual curation	17348690;22049079;24062467
Heparin/Heparan sulfate	TPSAB1	Dataset PMID:21454685	15567416
Heparin/Heparan sulfate	IGFBP7	SRB lab manual curation	24737780
Heparin/Heparan sulfate	LAMA4	MatrixDB;Dataset PMID:24246365	10893232
Heparin/Heparan sulfate	ECM1	SRB lab manual curation	DOI: 10.1016/j.smallrumres.2013.01.005
Heparin/Heparan sulfate	OCLN	MatrixDB	21454685
Heparin/Heparan sulfate	CCL15	Dataset PMID:21454685;GO;UniProtKB	14984572
Heparin/Heparan sulfate	LAMA3	MatrixDB;Dataset PMID:24246365	11373281
Heparin/Heparan sulfate	UGP2	SRB lab manual curation	DOI: 10.1016/j.smallrumres.2013.01.005
Heparin/Heparan sulfate	RSPO4	Dataset PMID:21454685;GO;UniProtKB	19238248
Heparin/Heparan sulfate	RSPO1	Dataset PMID:21454685;GO;UniProtKB	16543246
Heparin/Heparan sulfate	HFE	MatrixDB	21454685
Heparin/Heparan sulfate	CDON	Dataset PMID:24246365	17348690
Heparin/Heparan sulfate	HSD17B12	MatrixDB;GO	21454685
Heparin/Heparan sulfate	FBLN7	Dataset PMID:21454685;GO;UniProtKB	17699513
Heparin/Heparan sulfate	ARTN	Dataset PMID:21454685	17298301
Heparin/Heparan sulfate	COL13A1	Dataset PMID:21454685;GO;UniProtKB	11956183
Heparin/Heparan sulfate	STEAP4	MatrixDB	21454685
Heparin/Heparan sulfate	IRGC	MatrixDB	21454685
Heparin/Heparan sulfate	PLBD1	MatrixDB	21454685
Heparin/Heparan sulfate	SLC39A4	MatrixDB	21454685
Heparin/Heparan sulfate	NOTUM	SRB lab manual curation	25731175
Heparin/Heparan sulfate	APOA5	MatrixDB;Dataset PMID:21454685;GO	17326667;15878877
Heparin/Heparan sulfate	PRSS57	GO;UniProtKB	25156428
Heparin/Heparan sulfate	NPNT	MatrixDB	23357641
Heparin/Heparan sulfate	RSPO2	Dataset PMID:21454685;GO;UniProtKB	16543246
Heparin/Heparan sulfate	LIPI	GO;UniProtKB	12963729
Heparin/Heparan sulfate	TMEM184A	GO	GO_REF:0000024
Heparin/Heparan sulfate	ADAMTSL5	MatrixDB;GO;UniProtKB	23010571
Heparin/Heparan sulfate	CCDC80	GO	GO_REF:0000107
Heparin/Heparan sulfate	HS2ST1	UniProtKB;SRB lab manual curation	21224284
Heparin/Heparan sulfate	HSD17B13	MatrixDB	21454685
Heparin/Heparan sulfate	ABI3BP	GO	GO_REF:0000107
Heparin/Heparan sulfate	RTN4RL1	GO	GO_REF:0000024
Heparin/Heparan sulfate	COL23A1	Dataset PMID:21454685	12644459
Heparin/Heparan sulfate	XYLT1	UniProtKB	19289103
Heparin/Heparan sulfate	NAV2	GO	GO_REF:0000107
Heparin/Heparan sulfate	SULF2	UniProtKB	23480519
Heparin/Heparan sulfate	SULF1	Dataset PMID:24246365;UniProtKB	19666466;27812771
Heparin/Heparan sulfate	HS3ST5	UniProtKB	12907690
Heparin/Heparan sulfate	DEFB106A	GO	24189797
Heparin/Heparan sulfate	NXPE1	MatrixDB	21454685
Heparin/Heparan sulfate	FGFRL1	GO	12813049;1806116
Heparin/Heparan sulfate	SFRP1	Dataset PMID:21454685;GO	9192640;10660608;11741940
Heparin/Heparan sulfate	HSD17B11	MatrixDB	21454685
Heparin/Heparan sulfate	SERBP1	MatrixDB	21454685
Heparin/Heparan sulfate	FGFBP3	GO;UniProtKB	18669637
Heparin/Heparan sulfate	NDNF	GO;UniProtKB	17298301
Heparin/Heparan sulfate	ITFG1	MatrixDB	21454685
Heparin/Heparan sulfate	ADAMTS15	GO	GO_REF:0000107
Heparin/Heparan sulfate	HPSE2	GO;UniProtKB	20576607
Heparin/Heparan sulfate	STAB2	MatrixDB;GO;UniProtKB	21454685;12963729
Heparin/Heparan sulfate	NCSTN	MatrixDB	21454685
Heparin/Heparan sulfate	CCL17	Dataset PMID:21454685	11286540
Heparin/Heparan sulfate	SORL1	MatrixDB	17326667
Heparin/Heparan sulfate	PCSK5	Dataset PMID:21454685	12535616
Heparin/Heparan sulfate	NELL1	SRB lab manual curation	26627376
Heparin/Heparan sulfate	FGF14	Dataset PMID:21454685;GO	12815063
Heparin/Heparan sulfate	SLC38A4	MatrixDB	21454685
Heparin/Heparan sulfate	ELSPBP1	GO	PAINT_REF:22918
Heparin/Heparan sulfate	SLC22A18	MatrixDB	21454685
Heparin/Heparan sulfate	ORAI1	MatrixDB	21454685
Heparin/Heparan sulfate	ZG16B	SRB lab manual curation	DOI: 10.1016/j.smallrumres.2013.01.005
Heparin/Heparan sulfate	BCAN	MatrixDB	19576282
Heparin/Heparan sulfate	CPB2	MatrixDB	21454685
Heparin/Heparan sulfate	HS6ST2	UniProtKB	7876170
Heparin/Heparan sulfate	SLC46A1	MatrixDB	21454685
Heparin/Heparan sulfate	HBEGF	Dataset PMID:24246365;Dataset PMID:21454685;GO;UniProtKB	12552001;8300582;9135143
Heparin/Heparan sulfate	SORT1	MatrixDB	21454685
Heparin/Heparan sulfate	CCL13	Dataset PMID:21454685	10770945
Heparin/Heparan sulfate	SLC38A3	MatrixDB	21454685
Heparin/Heparan sulfate	COL12A1	Dataset PMID:21454685	7642694
Heparin/Heparan sulfate	CCL19	MatrixDB;Dataset PMID:21454685	27044744;18030990
Heparin/Heparan sulfate	NRTN	Dataset PMID:21454685	17298301
Heparin/Heparan sulfate	SOST	Dataset PMID:21454685;GO;UniProtKB	19208630
Heparin/Heparan sulfate	FAM213A	MatrixDB	21454685
Heparin/Heparan sulfate	LXN	GO;UniProtKB	GO_REF:0000037
Heparin/Heparan sulfate	LGR4	MatrixDB	21454685
Heparin/Heparan sulfate	SLC12A9	MatrixDB	21454685
Heparin/Heparan sulfate	COL25A1	Dataset PMID:21454685;GO;UniProtKB	15615705;15522881
Heparin/Heparan sulfate	RSPO3	Dataset PMID:21454685;GO;UniProtKB	16543246
Heparin/Heparan sulfate	ANGPTL4	MatrixDB;Dataset PMID:24246365	19019854
Heparin/Heparan sulfate	REG4	GO	20692269
Heparin/Heparan sulfate	RTN4R	GO	GO_REF:0000024
Heparin/Heparan sulfate	IMPG2	MatrixDB;GO;UniProtKB	15044457
Heparin/Heparan sulfate	FGF23	UniProtKB	22396159
Heparin/Heparan sulfate	CRISPLD2	GO	GO_REF:0000107
Heparin/Heparan sulfate	XYLT2	SRB lab manual curation	19289103
Heparin/Heparan sulfate	ABCG5	MatrixDB	21454685
Heparin/Heparan sulfate	CXCL16	Dataset PMID:21454685	18030990
Heparin/Heparan sulfate	CHRD	MatrixDB;Dataset PMID:21454685;GO	15381701
Heparin/Heparan sulfate	SMOC2	GO	GO_REF:0000107
Heparin/Heparan sulfate	SMOC1	Dataset PMID:24246365;SRB lab manual curation	23437253
Heparin/Heparan sulfate	TFB2M	SRB lab manual curation	27903899
Heparin/Heparan sulfate	CCDC134	MatrixDB	21454685
Heparin/Heparan sulfate	GREM2	GO;UniProtKB	28104757
Heparin/Heparan sulfate	FGF22	Dataset PMID:21454685	18835578
Heparin/Heparan sulfate	FGF20	Dataset PMID:21454685;UniProtKB	17397238;27030175
Heparin/Heparan sulfate	CCL28	Dataset PMID:21454685	18030990
Heparin/Heparan sulfate	PLA2G3	UniProtKB	21690215;168536
Heparin/Heparan sulfate	ADA2	Dataset PMID:24246365;GO;UniProtKB	20147294;20453107
Heparin/Heparan sulfate	SEMA5B	Dataset PMID:21454685	17317573
Heparin/Heparan sulfate	ADAMTS9	Dataset PMID:21454685	16507336
Heparin/Heparan sulfate	OPTC	Dataset PMID:24246365	16303928
Heparin/Heparan sulfate	CTSZ	SRB lab manual curation	15797245
Heparin/Heparan sulfate	DMBT1	UniProtKB	19189310
Heparin/Heparan sulfate	FETUB	MatrixDB	21454685
Heparin/Heparan sulfate	ADAMTS1	Dataset PMID:21454685;GO;UniProtKB	9593739
Heparin/Heparan sulfate	LNPEP	MatrixDB	21454685
Heparin/Heparan sulfate	SERPINA10	Dataset PMID:24246365;GO;UniProtKB	22540147
Heparin/Heparan sulfate	TENM1	Dataset PMID:21454685;GO	10341219
Heparin/Heparan sulfate	PCOLCE2	Dataset PMID:21454685;GO;UniProtKB	12393877
Heparin/Heparan sulfate	ADAMTS5	Dataset PMID:21454685;GO	16507336
Heparin/Heparan sulfate	PLA2G2D	GO;UniProtKB	12047378;11034411
Heparin/Heparan sulfate	ABCG2	MatrixDB	21454685
Heparin/Heparan sulfate	TFR2	MatrixDB	21454685
Heparin/Heparan sulfate	ADAMTS8	GO;UniProtKB	GO_REF:0000037
Heparin/Heparan sulfate	COLQ	MatrixDB;Dataset PMID:21454685;UniProtKB	3161900;12684510;10926855;7744733
Heparin/Heparan sulfate	HPSE	UniProtKB	20576607
Heparin/Heparan sulfate	ITM2B	MatrixDB	21454685
Heparin/Heparan sulfate	CCL27	Dataset PMID:21454685	16033763
Heparin/Heparan sulfate	ANGPTL3	GO;UniProtKB	GO_REF:0000037
Heparin/Heparan sulfate	LIPG	GO;UniProtKB	GO_REF:0000037
Heparin/Heparan sulfate	ADGRG1	GO;UniProtKB	27068534
Heparin/Heparan sulfate	HS3ST3A1	SRB lab manual curation	15304505
Heparin/Heparan sulfate	SLC22A7	MatrixDB	21454685
Heparin/Heparan sulfate	SLC30A1	MatrixDB	21454685
Heparin/Heparan sulfate	ROBO1	Dataset PMID:21454685	18359766
Heparin/Heparan sulfate	SLC4A4	MatrixDB	21454685
Heparin/Heparan sulfate	LOX PFRAG (PRO_0000018520)*	SRB lab manual curation	30082873
Hyaluronan	ITGA5,ITGB1 CPX	MatrixDB	19542224
Hyaluronan	LGALS8	SRB lab manual curation	20375348
Hyaluronan	NCAN	MatrixDB;GO;UniProtKB	19576282
Hyaluronan	SUSD5	GO;UniProtKB	GO_REF:0000002
Hyaluronan	HMMR	GO;UniProtKB	PAINT_REF:18956
Hyaluronan	ALB	MatrixDB	19394422
Hyaluronan	HAPLN1	GO;UniProtKB	PAINT_REF:22804
Hyaluronan	COL6A3	MatrixDB	1425570
Hyaluronan	VCAN	MatrixDB;GO;UniProtKB	15980072
Hyaluronan	GFAP	SRB lab manual curation	20375348
Hyaluronan	CD44	SRB lab manual curation;GO;UniProtKB	24606063;17293874;17170110;17324121;1991450
Hyaluronan	ACAN	GO;UniProtKB	PAINT_REF:22804
Hyaluronan	ITIH2	UniProtKB
Hyaluronan	ITIH1	UniProtKB
Hyaluronan	IRS1	SRB lab manual curation	20375348
Hyaluronan	SPAM1	MatrixDB	22142621
Hyaluronan	CABP4	SRB lab manual curation	20375348
Hyaluronan	TNFAIP6	MatrixDB;Dataset PMID:24246365;Dataset PMID:29362135;GO;UniProtKB	15183770;24005673;15917224;21596748;15060082;26823460;16873769;26468290;15840581
Hyaluronan	LOX PFRAG (PRO_0000018520)*	SRB lab manual curation	30082873
Hyaluronan	APP PFRAG1 (PRO_0000000092)*	MatrixDB	19542224
Hyaluronan	C1QBP	GO;UniProtKB	8567680
Hyaluronan	USP17L24	GO;UniProtKB	17109758
Hyaluronan	HYAL1	MatrixDB	18083358;18337076;19394422;20043995
Hyaluronan	HYAL2	GO;UniProtKB	12676986;19443707
Hyaluronan	HABP2	MatrixDB;UniProtKB	22142621
Hyaluronan	PCOLCE	MatrixDB	24117177
Hyaluronan	IGFBP7	SRB lab manual curation	12847218
Hyaluronan	HADH	SRB lab manual curation	20375348
Hyaluronan	HABP4	UniProtKB
Hyaluronan	USP17L6P	GO	17109758
Hyaluronan	LAYN	GO;UniProtKB	11294894
Hyaluronan	HAPLN4	GO;UniProtKB	PAINT_REF:22804
Hyaluronan	KRTAP13-1	SRB lab manual curation	20375348
Hyaluronan	CEMIP	GO;UniProtKB	23509262
Hyaluronan	STAB2	GO;UniProtKB	GO_REF:0000024
Hyaluronan	BCAN	MatrixDB;GO;UniProtKB	19576282
Hyaluronan	HAPLN3	GO;UniProtKB	PAINT_REF:22804
Hyaluronan	IMPG2	MatrixDB;GO;UniProtKB	15044457;10702256
Hyaluronan	HAPLN2	GO;UniProtKB	PAINT_REF:22804
Hyaluronan	CHODL	GO	12079284
Hyaluronan	STAB1	GO;UniProtKB	GO_REF:0000002
Hyaluronan	CEMIP2	GO	PAINT_REF:15535
Hyaluronan	LYVE1	GO;UniProtKB	GO_REF:0000107
Keratan sulfate	E2F8	SRB lab manual curation	20375348
Keratan sulfate	WWP2	SRB lab manual curation	20375348
Keratan sulfate	STK25	SRB lab manual curation	20375348
Keratan sulfate	LAD1	SRB lab manual curation	20375348
Keratan sulfate	EBAG9	SRB lab manual curation	20375348
Keratan sulfate	NTN3	SRB lab manual curation	20375348
Keratan sulfate	ABLIM1	SRB lab manual curation	20375348
Keratan sulfate	AURKA	SRB lab manual curation	20375348
Keratan sulfate	SEMA3E	SRB lab manual curation	20375348
Keratan sulfate	KIF3B	SRB lab manual curation	20375348
Keratan sulfate	CHUK	SRB lab manual curation	20375348
Keratan sulfate	DAPK3	SRB lab manual curation	20375348
Keratan sulfate	RGS14	SRB lab manual curation	20375348
Keratan sulfate	DCX	SRB lab manual curation	20375348
Keratan sulfate	EFNA2	SRB lab manual curation	20375348
Keratan sulfate	NUAK1	SRB lab manual curation	20375348
Keratan sulfate	NMT2	SRB lab manual curation	20375348
Keratan sulfate	CCNT1	SRB lab manual curation	20375348
Keratan sulfate	PQBP1	SRB lab manual curation	20375348
Keratan sulfate	SLIT3	SRB lab manual curation	20375348
Keratan sulfate	RPS6KA4	SRB lab manual curation	20375348
Keratan sulfate	BCAR3	SRB lab manual curation	20375348
Keratan sulfate	EIF3G	SRB lab manual curation	20375348
Keratan sulfate	DNAJC8	SRB lab manual curation	20375348
Keratan sulfate	TPPP	SRB lab manual curation	20375348
Keratan sulfate	SLIT2	SRB lab manual curation	20375348
Keratan sulfate	SCEL	SRB lab manual curation	20375348
Keratan sulfate	FMNL1	SRB lab manual curation	20375348
Keratan sulfate	NTN1	SRB lab manual curation	20375348
Keratan sulfate	FGFR1OP	SRB lab manual curation	20375348
Keratan sulfate	PAK4	SRB lab manual curation	20375348
Keratan sulfate	ABL1	SRB lab manual curation	20375348
Keratan sulfate	PDGFB	SRB lab manual curation	20375348
Keratan sulfate	LMNA	SRB lab manual curation	20375348
Keratan sulfate	PDGFA	SRB lab manual curation	20375348
Keratan sulfate	ERBB2	SRB lab manual curation	20375348
Keratan sulfate	NTRK1	SRB lab manual curation	20375348
Keratan sulfate	HMGN1	SRB lab manual curation	20375348
Keratan sulfate	CDK1	SRB lab manual curation	20375348
Keratan sulfate	NPM1	SRB lab manual curation	20375348
Keratan sulfate	FES	SRB lab manual curation	20375348
Keratan sulfate	YES1	SRB lab manual curation	20375348
Keratan sulfate	LYN	SRB lab manual curation	20375348
Keratan sulfate	HCK	SRB lab manual curation	20375348
Keratan sulfate	HMGB1	SRB lab manual curation	20375348
Keratan sulfate	TFPT	SRB lab manual curation	20375348
Keratan sulfate	KIT	SRB lab manual curation	20375348
Keratan sulfate	MAP2	SRB lab manual curation	20375348
Keratan sulfate	FGFR1	SRB lab manual curation	20375348
Keratan sulfate	SRC	SRB lab manual curation	20375348
Keratan sulfate	TNFRSF1B	SRB lab manual curation	20375348
Keratan sulfate	EFNA1	SRB lab manual curation	20375348
Keratan sulfate	EPHA1	SRB lab manual curation	20375348
Keratan sulfate	ITGA6	SRB lab manual curation	20375348
Keratan sulfate	EPHA2	SRB lab manual curation	20375348
Keratan sulfate	EPHA3	SRB lab manual curation	20375348
Keratan sulfate	EPHA8	SRB lab manual curation	20375348
Keratan sulfate	NMT1	SRB lab manual curation	20375348
Keratan sulfate	AXL	SRB lab manual curation	20375348
Keratan sulfate	TTK	SRB lab manual curation	20375348
Keratan sulfate	CTNNA1	SRB lab manual curation	20375348
Keratan sulfate	IRS1	SRB lab manual curation	20375348
Keratan sulfate	ADD2	SRB lab manual curation	20375348
Keratan sulfate	KDR	SRB lab manual curation	20375348
Keratan sulfate	MAP2K2	SRB lab manual curation	20375348
Keratan sulfate	FLT3	SRB lab manual curation	20375348
Keratan sulfate	COIL	SRB lab manual curation	20375348
Keratan sulfate	ACTR1B	SRB lab manual curation	20375348
Keratan sulfate	ABL2	SRB lab manual curation	20375348
Keratan sulfate	DCC	SRB lab manual curation	20375348
Keratan sulfate	CTSK	SRB lab manual curation	14645229
Keratan sulfate	CDKN1B	SRB lab manual curation	20375348
Keratan sulfate	CSNK1E	SRB lab manual curation	20375348
Keratan sulfate	GSK3B	SRB lab manual curation	20375348
Keratan sulfate	LIG3	SRB lab manual curation	20375348
Keratan sulfate	MEOX1	SRB lab manual curation	20375348
Keratan sulfate	DNM2	SRB lab manual curation	20375348
Keratan sulfate	DAP	SRB lab manual curation	20375348
Keratan sulfate	BMX	SRB lab manual curation	20375348
Keratan sulfate	NEK2	SRB lab manual curation	20375348
Keratan sulfate	NEK3	SRB lab manual curation	20375348
Keratan sulfate	NEK4	SRB lab manual curation	20375348
Keratan sulfate	MAP2K6	SRB lab manual curation	20375348
Keratan sulfate	EFNA3	SRB lab manual curation	20375348
Keratan sulfate	EFNA4	SRB lab manual curation	20375348
Keratan sulfate	EFNB2	SRB lab manual curation	20375348
Keratan sulfate	EFNA5	SRB lab manual curation	20375348
Keratan sulfate	PLK1	SRB lab manual curation	20375348
Keratan sulfate	EPHB3	SRB lab manual curation	20375348
Keratan sulfate	EPHB4	SRB lab manual curation	20375348
Keratan sulfate	EPHB1	SRB lab manual curation	20375348
Keratan sulfate	EPHA4	SRB lab manual curation	20375348
Keratan sulfate	EIF5	SRB lab manual curation	20375348
Keratan sulfate	ARPP19	SRB lab manual curation	20375348
Keratan sulfate	CSNK1G2	SRB lab manual curation	20375348
Keratan sulfate	EFNB1	SRB lab manual curation	20375348
Keratan sulfate	FKBP3	SRB lab manual curation	20375348
Keratan sulfate	NRG1	SRB lab manual curation	20375348
Keratan sulfate	CACNB1	SRB lab manual curation	20375348
Keratan sulfate	MAP3K10	SRB lab manual curation	20375348
Keratan sulfate	BTK	SRB lab manual curation	20375348
Keratan sulfate	DMTN	SRB lab manual curation	20375348
Keratan sulfate	PPID	SRB lab manual curation	20375348
Keratan sulfate	IFRD2	SRB lab manual curation	20375348
Keratan sulfate	AIMP1	SRB lab manual curation	20375348
Keratan sulfate	PPP1R8	SRB lab manual curation	20375348
Keratan sulfate	COASY	SRB lab manual curation	20375348
Keratan sulfate	PAK1	SRB lab manual curation	20375348
Keratan sulfate	PRKG2	SRB lab manual curation	20375348
Keratan sulfate	SEMA3F	SRB lab manual curation	20375348
Keratan sulfate	G3BP1	SRB lab manual curation	20375348
Keratan sulfate	KCNAB2	SRB lab manual curation	20375348
Keratan sulfate	PDAP1	SRB lab manual curation	20375348
Keratan sulfate	ZMYM3	SRB lab manual curation	20375348
Keratan sulfate	PTK2B	SRB lab manual curation	20375348
Keratan sulfate	FAM50A	SRB lab manual curation	20375348
Keratan sulfate	CAPRIN1	SRB lab manual curation	20375348
Keratan sulfate	SEMA3A	SRB lab manual curation	20375348
Keratan sulfate	MESD	SRB lab manual curation	20375348
Keratan sulfate	BRD3	SRB lab manual curation	20375348
Keratan sulfate	ERBB4	SRB lab manual curation	20375348
Keratan sulfate	RPS6KA2	SRB lab manual curation	20375348
Keratan sulfate	EPHA7	SRB lab manual curation	20375348
Keratan sulfate	RPS6KA1	SRB lab manual curation	20375348
Keratan sulfate	MAPRE1	SRB lab manual curation	20375348
Keratan sulfate	EFNB3	SRB lab manual curation	20375348
Keratan sulfate	IGFBP7	SRB lab manual curation	12847218
Keratan sulfate	NTRK3	SRB lab manual curation	20375348
Keratan sulfate	PKN2	SRB lab manual curation	20375348
Keratan sulfate	NTRK2	SRB lab manual curation	20375348
Keratan sulfate	MAPKAPK3	SRB lab manual curation	20375348
Keratan sulfate	UBE2S	SRB lab manual curation	20375348
Keratan sulfate	SMTNL2	SRB lab manual curation	20375348
Keratan sulfate	PRR16	SRB lab manual curation	20375348
Keratan sulfate	ODF2	SRB lab manual curation	20375348
Keratan sulfate	ARHGAP17	SRB lab manual curation	20375348
Keratan sulfate	AMMECR1L	SRB lab manual curation	20375348
Keratan sulfate	MZT2A	SRB lab manual curation	20375348
Keratan sulfate	PSRC1	SRB lab manual curation	20375348
Keratan sulfate	GLB1L	SRB lab manual curation	20375348
Keratan sulfate	LARP4	SRB lab manual curation	20375348
Keratan sulfate	ASXL2	SRB lab manual curation	20375348
Keratan sulfate	MARK2	SRB lab manual curation	20375348
Keratan sulfate	EEPD1	SRB lab manual curation	20375348
Keratan sulfate	TRPT1	SRB lab manual curation	20375348
Keratan sulfate	DDX42	SRB lab manual curation	20375348
Keratan sulfate	COL23A1	SRB lab manual curation	20375348
Keratan sulfate	TBC1D10C	SRB lab manual curation	20375348
Keratan sulfate	PRR15	SRB lab manual curation	20375348
Keratan sulfate	VRK3	SRB lab manual curation	20375348
Keratan sulfate	ASXL1	SRB lab manual curation	20375348
Keratan sulfate	UNC5B	SRB lab manual curation	20375348
Keratan sulfate	CRACR2B	SRB lab manual curation	20375348
Keratan sulfate	DCLK2	SRB lab manual curation	20375348
Keratan sulfate	ANKS4B	SRB lab manual curation	20375348
Keratan sulfate	SERBP1	SRB lab manual curation	20375348
Keratan sulfate	PIP4K2C	SRB lab manual curation	20375348
Keratan sulfate	DDX54	SRB lab manual curation	20375348
Keratan sulfate	TCP10L	SRB lab manual curation	20375348
Keratan sulfate	TRUB1	SRB lab manual curation	20375348
Keratan sulfate	ING5	SRB lab manual curation	20375348
Keratan sulfate	RTF1	SRB lab manual curation	20375348
Keratan sulfate	KIAA1143	SRB lab manual curation	20375348
Keratan sulfate	RAD51AP1	SRB lab manual curation	20375348
Keratan sulfate	LENG1	SRB lab manual curation	20375348
Keratan sulfate	AURKB	SRB lab manual curation	20375348
Keratan sulfate	MARK4	SRB lab manual curation	20375348
Keratan sulfate	UBXN10	SRB lab manual curation	20375348
Keratan sulfate	UBE2E2	SRB lab manual curation	20375348
Keratan sulfate	CCDC43	SRB lab manual curation	20375348
Keratan sulfate	TSSK2	SRB lab manual curation	20375348
Keratan sulfate	SRPK1	SRB lab manual curation	20375348
Keratan sulfate	STAC	SRB lab manual curation	20375348
Keratan sulfate	KIF2C	SRB lab manual curation	20375348
Keratan sulfate	PCDHGC3	SRB lab manual curation	20375348
Keratan sulfate	PYM1	SRB lab manual curation	20375348
Keratan sulfate	LARP6	SRB lab manual curation	20375348
Keratan sulfate	DIDO1	SRB lab manual curation	20375348
Keratan sulfate	SLC4A1AP	SRB lab manual curation	20375348
Keratan sulfate	TSSK1B	SRB lab manual curation	20375348
Keratan sulfate	MRPL1	SRB lab manual curation	20375348
Keratan sulfate	NSRP1	SRB lab manual curation	20375348
Keratan sulfate	MYLK2	SRB lab manual curation	20375348
Keratan sulfate	SEMA6A	SRB lab manual curation	20375348
Keratan sulfate	TCEAL2	SRB lab manual curation	20375348
Keratan sulfate	SEMA4A	SRB lab manual curation	20375348
Keratan sulfate	SEMA6B	SRB lab manual curation	20375348
Keratan sulfate	OCEL1	SRB lab manual curation	20375348
Keratan sulfate	RPAP3	SRB lab manual curation	20375348
Keratan sulfate	NTN4	SRB lab manual curation	20375348
Keratan sulfate	SYTL2	SRB lab manual curation	20375348
Keratan sulfate	ROBO2	SRB lab manual curation	20375348
Keratan sulfate	JADE2	SRB lab manual curation	20375348
Keratan sulfate	HOMER2	SRB lab manual curation	20375348
Keratan sulfate	IRAK4	SRB lab manual curation	20375348
Keratan sulfate	MAP3K20	SRB lab manual curation	20375348
Keratan sulfate	NKIRAS1	SRB lab manual curation	20375348
Keratan sulfate	PLK2	SRB lab manual curation	20375348
Keratan sulfate	CWC15	SRB lab manual curation	20375348
Keratan sulfate	SIRPG	SRB lab manual curation	20375348
Keratan sulfate	RPS6KB2	SRB lab manual curation	20375348
Keratan sulfate	CFDP1	SRB lab manual curation	20375348
Keratan sulfate	EPHA6	SRB lab manual curation	20375348
Keratan sulfate	AFF4	SRB lab manual curation	20375348
Keratan sulfate	TBK1	SRB lab manual curation	20375348
Keratan sulfate	DAPK2	SRB lab manual curation	20375348
Keratan sulfate	ANKRD50	SRB lab manual curation	20375348
Keratan sulfate	DDX19B	SRB lab manual curation	20375348
Keratan sulfate	LIMCH1	SRB lab manual curation	20375348
Keratan sulfate	BAIAP2	SRB lab manual curation	20375348
Keratan sulfate	RBM8A	SRB lab manual curation	20375348
Keratan sulfate	ZNF706	SRB lab manual curation	20375348
Keratan sulfate	F11R	SRB lab manual curation	20375348
Keratan sulfate	STK24	SRB lab manual curation	20375348
Keratan sulfate	CSNK1G3	SRB lab manual curation	20375348
Keratan sulfate	ROBO1	SRB lab manual curation	20375348
Keratan sulfate	SETBP1	SRB lab manual curation	20375348
Keratan sulfate	ZHX2	SRB lab manual curation	20375348
* PRO feature is indicated for each protein fragment

## Sheet: Comprehensive_GAG interactome
Partner A (GAG or gene name)	Partner B (gene name)	Source(s) of interaction data	PMID(s)
A1BG	ABCC6	MatrixDB	21988832
A1BG	PRDX4	MatrixDB	21988832
A1BG	SNCA	MatrixDB	21900206
A2M	APOE	MatrixDB	21163940
A2M	APP	MatrixDB	21163940
A2M	HAPLN3	BioPlex 2.0	26186194;28514442
A2M	IL10	MatrixDB	25241761
A2M	MAPT	MatrixDB	26402096;26402096
A2M	MMP2	MatrixDB	25241761
A2M	NUDT21	MatrixDB	21900206
A2M	PTX3	BioPlex 2.0	26186194;28514442
A2M	TGM2	MatrixDB	21988832
A2M	TTR	MatrixDB	21900206
ABCC6	FURIN	MatrixDB	21988832
ABL1	APP	MatrixDB	11279131
ABL1	C6	MatrixDB	17474147
ABL1	CHRD	MatrixDB	17474147
ABL1	EFNA5	MatrixDB	17474147
ABL1	ERBB4	MatrixDB	16273093
ABL1	ITGB1	Adhesome	19903482
ABL1	KIT	MatrixDB	24728074;24728074
ABL1	LTBP2	MatrixDB	17474147
ABL1	SNCA	MatrixDB	24412932;24412932;24412932;24412932;24412932;24412932;24412932;24412932;24412932;24412932;24412932
ABL2	ERBB4	MatrixDB	16273093;16273093;16273093;16273093
ABL2	KIT	MatrixDB	24728074;24728074
ABL2	MET	MatrixDB	24728074
ABL2	PECAM1	MatrixDB	23322602
ACAN	ADAMTS5	MatrixDB	21055468;22406378;22406378
ACAN	CD44	MatrixDB	12556525
ACAN	COMP	MatrixDB	17588949;17588949
ACAN	MMP2	MatrixDB	21055468
ACAN	MMP7	MatrixDB	21055468
ACAN	NEK4	MatrixDB	25798074
ACAN	PCOLCE	MatrixDB	24117177
ACAN	THBS1,THBS1,THBS1 CPX	SRB lab manual curation	17046999
ACAN	TNC	Dataset PMID:19838819	14722076
ACAN	TNFAIP6	Dataset PMID:29362135	29129649;9654129
ACTR1B	SNCA	MatrixDB	18614564
ADAMTS1	PRG2	BioPlex 2.0	26186194;28514442
ADAMTS1	USP17L24	MatrixDB	19615732
ADAMTS5	TIMP3	MatrixDB;SRB lab manual curation	19643179;25176127;25176127
ADAMTSL5	FBN1	MatrixDB	23010571
ADAMTSL5	FBN2	MatrixDB	23010571
ADGRG1	COL3A1	MatrixDB	22238662;22238662;22238662;22238662
ADRA1B	ALB	MatrixDB	15174051
AFF4	MDK	BioPlex 2.0	26186194;28514442
AGER	AGER	MatrixDB	24119142;24119142;24474694
AGER	COL1A1,COL1A1,COL1A2 CPX	SRB lab manual curation	24642901
AGER	COL4A1,COL4A1,COL4A2 CPX	SRB lab manual curation	24642901
AGER	HMGB1	MatrixDB	24474694;24474694;24474694
AGER	IRAK4	MatrixDB	21829704;21829704;21829704;21829704
AGER	ITGB1	MatrixDB	30021884
AGER	LAMA1,LAMB1,LAMC1 CPX	SRB lab manual curation	24642901
AGER	TTR	MatrixDB	16716307;16716307
AGRN	APP PFRAG1 (PRO_0000000092)*	MatrixDB	28106549
AGRN	NPNT	MatrixDB	23357641
ALB	ALB	MatrixDB	26554815;26554815;26554815;26554815;26554815;26554815;26554815;15174051
ALB	APOE	MatrixDB	15174051
ALB	APP PFRAG1 (PRO_0000000092)*	MatrixDB	28106549
ALB	C4A	MatrixDB	15174051
ALB	CFB	MatrixDB	15174051
ALB	CFD	MatrixDB	15174051
ALB	CFH	MatrixDB	15174051
ALB	DCC	MatrixDB	15174051
ALB	F2	MatrixDB	15174051;15174051
ALB	FBN1	MatrixDB	19755719;19755719
ALB	FCGRT	MatrixDB	18272495
ALB	FGA	MatrixDB	15174051;15174051
ALB	FN1	MatrixDB	15174051;15174051;15174051
ALB	GFAP	MatrixDB	15174051;15174051
ALB	GSN	MatrixDB	15174051
ALB	HP	MatrixDB	15174051
ALB	ITIH1	MatrixDB	15174051
ALB	PF4V1	MatrixDB	15174051
ALB	PPBP	MatrixDB	15174051
ALB	PRSS1	MatrixDB	15174051
ALB	SCN5A	MatrixDB	15174051
ALB	SERPING1	MatrixDB	15174051
ALB	SOD1	MatrixDB	26496610
ALB	TF	MatrixDB	15174051
ALB	TFRC	MatrixDB	23384347;23384347
ALB	TTR	MatrixDB	15174051;15174051;15174051
AMBP	CTSB	MatrixDB	16364318;16364318;16364318;16364318
AMBP	TNFAIP6	Dataset PMID:29362135	15917224;8568267;12401803
ANG	ANXA2	MatrixDB	24457100;24457100;24457100;24457100;24457100
ANG	ATP5F1A	MatrixDB	28777577
ANG	CDK1	MatrixDB	28777577
ANG	CTNNA1	MatrixDB	28777577
ANG	FST	MatrixDB	17991437;17991437;17991437;17991437;17991437
ANG	HSPA1A	MatrixDB	28777577
ANG	PLAU	MatrixDB	24457100;24457100
ANGPTL3	ITGAV	MatrixDB	11877390
ANGPTL3	LPL	MatrixDB	19318355;19028676;19318355
ANGPTL4	ANGPTL4	MatrixDB	19028676;19028676;19028676
ANGPTL4	APP PFRAG1 (PRO_0000000092)*	MatrixDB	28106549
ANGPTL4	AURKA	MatrixDB	25640309
ANGPTL4	FGFR4	MatrixDB	25640309
ANGPTL4	HSPG2	MatrixDB	19019854
ANGPTL4	ITGAV,ITGB3 CPX	SRB lab manual curation	15615705
ANGPTL4	ITGB1	MatrixDB	21397862;21397862
ANGPTL4	ITIH2	BioPlex 2.0	26186194;28514442
ANGPTL4	LPL	MatrixDB	19318355;19028676;19028676
ANGPTL4	NMT1	BioPlex 2.0	26186194;28514442
ANGPTL4	NMT2	BioPlex 2.0	26186194;28514442
ANGPTL4	TGFB1	MatrixDB	25640309
ANOS1	FGF2	MatrixDB	19696444;19696444
ANOS1	FGFR1	MatrixDB	19696444;19696444;19696444;19696444;19696444;19696444;19696444
ANOS1	FGFR2	MatrixDB	19696444
ANXA1	COL11A1	MatrixDB	22038862
ANXA1	COL1A1	MatrixDB	23754495
ANXA1	DDX19B	BioPlex 2.0	26186194;28514442
ANXA1	FN1	MatrixDB	19738201
ANXA1	HSPA1A	MatrixDB	23754495;23754495;23754495
ANXA1	SOD1	MatrixDB	29128334
ANXA1	SOST	MatrixDB	22206666
ANXA2	ANXA2	MatrixDB	18799458;26812398;26812398
ANXA2	BCAR3	MatrixDB	17353931
ANXA2	COL11A1	MatrixDB	22038862
ANXA2	ERBB2	MatrixDB	24189400
ANXA2	FLT1	MatrixDB	23063127
ANXA2	FN1	MatrixDB	19738201
ANXA2	PLG	MatrixDB	10077593
ANXA2	SOST	MatrixDB	22206666
ANXA2	SYTL2	MatrixDB	30021884
ANXA2	TNC	Dataset PMID:19838819	8816995;7518469
ANXA5	COL11A1	MatrixDB	22038862
ANXA5	FBN1	MatrixDB	19755719
ANXA6	ERBB2	MatrixDB	25640309
APCS	APCS	MatrixDB	19372378;19372378;19372378;23850452
APLP1	APLP1	MatrixDB	16193067;16193067;16193067;21930949
APLP1	APLP2	MatrixDB	16193067;16193067
APLP1	APP	MatrixDB	16193067;16193067
APLP1	SNCA	MatrixDB	21900206
APLP2	APP	MatrixDB	16193067;16193067
APOA5	LPL	MatrixDB	15178420
APOA5	LRP1	MatrixDB	17326667;17326667;17326667
APOA5	SORL1	MatrixDB	17326667;17326667;17326667;17326667
APOB	APOE	MatrixDB	8245722
APOB	LDLR	MatrixDB	24447298;24447298;24447298;24447298
APOB	LIPC	MatrixDB	9685400
APOB	NEK4	MatrixDB	25798074
APOB	PRDX4	MatrixDB	21988832
APOE	APOE	MatrixDB	8245722;8245722
APOE	APP	MatrixDB	26213366
APOE	HP	MatrixDB	19758344;19758344;19758344;19758344;19758344;19758344;19758344
APOE	LDLR	MatrixDB	24447298;24447298
APOE	MAPT	MatrixDB	7566652;7566652;26402096;26402096
APOE	PRNP	MatrixDB	15146195
APOE	PSEN1	MatrixDB	21163940
APOE	SORL1	MatrixDB	17326667;17326667
APOE	SOST	MatrixDB	22206666
APOH	APOH	MatrixDB	18822289;18822289;19805618
APOH	LDLR	MatrixDB	20223219;20223219;20223219
APOH	LPA	MatrixDB	9269765;9269765;9269765;9269765
APOH	PF4	MatrixDB	19805618;19805618;19805618;19805618;19805618;19805618
APOH	PLG	MatrixDB	16480936;16480936
APP	APP	MatrixDB	16286452;16193067;16193067;16193067;18805418;18805418;18805418;19549187;19549187;19549187;19549187;19549187;19549187;19549187;19549187;19549187;19549187;19754881;20573181;20818335;20818335;20818335;20818335;20818335;20818335;20818335;20818335;20818335;20818335;20818335;20818335;20818335;20818335;20818335;20818335;20818335;20818335;20818335;21205198;21205198;21205198;21205198;21205198;21205198;212…
APP	BACE1	MatrixDB	10531052;10531052;22801501
APP	COL18A1	BioPlex 2.0	26186194;28514442
APP	CTSD	MatrixDB	17112520;17112520
APP	GFAP	MatrixDB	16049941
APP	HOMER2	MatrixDB	18387811
APP	ITM2B	MatrixDB	21587206
APP	LRP1	MatrixDB	21968187
APP	MAPT	MatrixDB	16446437;16446437;16446437;16446437
APP	NCAM1	MatrixDB	18272596;17934213
APP	PDIA6	MatrixDB	17934213
APP	PPIB	MatrixDB	17934213
APP	PRNP	MatrixDB	16286452;23236467;23236467;24028865;24028865
APP	PSEN1	MatrixDB	9223340;9223340;9223340;9223340;9223340;21163940;21163940;21163940;21115843;11083918;11083918
APP	SNCA	MatrixDB	25241761
APP	SULF1	BioPlex 2.0	26186194;28514442
APP	SULF2	BioPlex 2.0	26186194;28514442
APP	TGFB1	MatrixDB	2119582;25241761;2119582
APP	TGFB2	MatrixDB	2119582;2119582;2119582;2119582;2119582;25241761;2119582
APP	TIMP3	BioPlex 2.0	26186194;28514442
APP	TNC	MatrixDB	18272596
APP	TNF	MatrixDB	17623297
APP	TTR	MatrixDB	20646067
APP PFRAG1 (PRO_0000000092)*	APP PFRAG1 (PRO_0000000092)*	MatrixDB	16492752;16492752;23907583;23907583;23907583;25732184;25732184;19264960;21949245;21949245;21949245;21949245;21949245;21949245;24052308;24052308;25686087;25686087;25686087;25686087;25938662;25938662;25938662;28219245;28219245
APP PFRAG1 (PRO_0000000092)*	BCAN	MatrixDB	28106549
APP PFRAG1 (PRO_0000000092)*	COL13A1,COL13A1,COL13A1 CPX	MatrixDB	28106549
APP PFRAG1 (PRO_0000000092)*	COL18A1	MatrixDB	28106549
APP PFRAG1 (PRO_0000000092)*	COL18A1 PFRAG1 (PRO_0000005794)*	MatrixDB	19542224;19542224
APP PFRAG1 (PRO_0000000092)*	COL18A1 PFRAG2 (PRO_0000441861)*	MatrixDB	19542224
APP PFRAG1 (PRO_0000000092)*	COL1A1,COL1A1,COL1A2 CPX	MatrixDB	28106549
APP PFRAG1 (PRO_0000000092)*	COL2A1,COL11A1,COL11A2 CPX	MatrixDB	19542224
APP PFRAG1 (PRO_0000000092)*	COL3A1,COL3A1,COL3A1 CPX	MatrixDB	28106549
APP PFRAG1 (PRO_0000000092)*	COL4A1,COL4A1,COL4A2 CPX	MatrixDB	28106549
APP PFRAG1 (PRO_0000000092)*	COL5A1,COL5A1,COL5A2 CPX	MatrixDB	28106549
APP PFRAG1 (PRO_0000000092)*	COL6A1,COL6A2,COL6A3 CPX	MatrixDB	28106549
APP PFRAG1 (PRO_0000000092)*	ECM1	MatrixDB	28106549
APP PFRAG1 (PRO_0000000092)*	ELN	MatrixDB	28106549
APP PFRAG1 (PRO_0000000092)*	F10	MatrixDB	28106549
APP PFRAG1 (PRO_0000000092)*	FGF2	MatrixDB	28106549
APP PFRAG1 (PRO_0000000092)*	FN1	MatrixDB	28106549
APP PFRAG1 (PRO_0000000092)*	ITGA4,ITGB1 CPX	MatrixDB	28106549
APP PFRAG1 (PRO_0000000092)*	ITGA5,ITGB1 CPX	MatrixDB	28106549
APP PFRAG1 (PRO_0000000092)*	ITGAV,ITGB3 CPX	MatrixDB	28106549
APP PFRAG1 (PRO_0000000092)*	ITGAV,ITGB5 CPX	MatrixDB	28106549
APP PFRAG1 (PRO_0000000092)*	KDR	MatrixDB	28106549
APP PFRAG1 (PRO_0000000092)*	LAMA1,LAMB1,LAMC1 CPX	MatrixDB	28106549
APP PFRAG1 (PRO_0000000092)*	MAPT	MatrixDB	16446437;16446437;16446437;16446437
APP PFRAG1 (PRO_0000000092)*	MMP2	MatrixDB	28106549
APP PFRAG1 (PRO_0000000092)*	NCAN	MatrixDB	28106549
APP PFRAG1 (PRO_0000000092)*	NRP1	MatrixDB	28106549
APP PFRAG1 (PRO_0000000092)*	PCOLCE	MatrixDB	24117177;24117177;24117177;28106549
APP PFRAG1 (PRO_0000000092)*	PLG	MatrixDB	28106549
APP PFRAG1 (PRO_0000000092)*	PRNP	MatrixDB	23907583;23907583
APP PFRAG1 (PRO_0000000092)*	SPARC	MatrixDB	28106549
APP PFRAG1 (PRO_0000000092)*	TGM2	MatrixDB	19542224;28106549
APP PFRAG1 (PRO_0000000092)*	THBS1	MatrixDB	19542224
APP PFRAG1 (PRO_0000000092)*	TNXB	MatrixDB	28106549
APP PFRAG1 (PRO_0000000092)*	TTR	MatrixDB	18272491
ARTN	ARTN	MatrixDB	16765900
ATP1A1	SOD1	MatrixDB	29128334;29128334
ATP1A1	TNFRSF1B	MatrixDB	14743216
ATP1B1	CD36	MatrixDB	24952909
ATP1B1	FGA	MatrixDB	24952909
ATP1B1	LPL	MatrixDB	24952909
ATP1B1	TFRC	MatrixDB	24952909
ATP5F1A	FN1	MatrixDB	19738201
ATP5F1A	KDR	MatrixDB	30021884
ATP5F1A	TNFRSF1B	MatrixDB	14743216
ATP7B	NRG1	BioPlex 2.0	26186194;28514442
AURKA	IGFBP3	MatrixDB	24412244
AURKA	TGFB1	MatrixDB	24412244
AXL	SRC	MatrixDB	22327215
B2M	B2M	MatrixDB	21569201;21569201;21569201;21569201;21569201;22289140;22289140;22575645;22575645;17108084;17108084;17108084;18579777;18579777;19172750;19172750;19172750;19172750;19564620;19564620;19564620;19564620;19564620;20826442;20826442;21131979;21131979;21131979;21131979;21131979;21131979;21131979;21131979;21220305;21220305;21220305
B2M	CD1D	MatrixDB	17581592
B2M	FCGRT	MatrixDB	10933786
B2M	HFE	MatrixDB	20618438;20618438;15965644;15965644
B2M	NCR2	MatrixDB	20164429
B2M	PCOLCE	MatrixDB	18164932;18164932;18164932;18164932;18164932;24117177
B2M	TFRC	MatrixDB	20133674;20133674
BACE1	MMP2	MatrixDB	25241761
BCAN	TNC	Dataset PMID:19838819	14722076
BCAN	VCAN	BioPlex 2.0	26186194;28514442
BCAR3	CCL5	MatrixDB	25640309
BCAR3	KIT	MatrixDB	24728074;24728074;24728074
BCAR3	MET	MatrixDB	24728074
BMP2	BMP2	MatrixDB	23122408
BMP2	CHRD	MatrixDB	17255107
BMP2	FSTL1	MatrixDB	20860622;20860622
BMP2	GREM2	MatrixDB	23850456
BMP2	NOG	MatrixDB	19804412;19804412
BMP2	POSTN	SRB lab manual curation	24858685
BMP2	TGFB2	MatrixDB	25241761
BMP2	TNC	SRB lab manual curation	23637968
BMP2	TNFAIP6	Dataset PMID:29362135	16771708;18586671
BMP4	CHRD	MatrixDB	17255107
BMP4	FSTL1	MatrixDB	20860622
BMP4	GREM2	MatrixDB	23850456
BMP4	TNFAIP6	Dataset PMID:29362135	18586671
BMP6	TNFAIP6	MatrixDB;Dataset PMID:29362135	18586671;18586671
BMP7	NOG	MatrixDB	12478285
BMP7	TNFAIP6	Dataset PMID:29362135	18586671
BTC	ERBB2	MatrixDB	25241761
BTK	MET	MatrixDB	24728074
BTK	PLAU	MatrixDB	21988832
C1QA	C1QB	MatrixDB	7240
C1QA,C1QA,C1QA,C1QA,C1QA,C1QA,C1QB,C1QB,C1QB,C1QB,C1QB,C1QB,C1QC,C1QC,C1QC,C1QC,C1QC,C1QC CPX	MBL2	MatrixDB	19632990
C1QA,C1QA,C1QA,C1QA,C1QA,C1QA,C1QB,C1QB,C1QB,C1QB,C1QB,C1QB,C1QC,C1QC,C1QC,C1QC,C1QC,C1QC CPX	PTX3	MatrixDB	19050261;19050261;21490156;21490156;21490156;19632990;19632990;21490156
C1QB	FN1	BioPlex 2.0	26186194;28514442
C1QBP	COIL	MatrixDB	16713569;16713569
C1QBP	CSNK1E	MatrixDB	20360068
C1QBP	F12	MatrixDB	8710908;8710908
C1QBP	F2	MatrixDB	8900153;8900153;8900153
C1QBP	FN1	MatrixDB	19738201
C1QBP	HABP4	MatrixDB	19523114
C1QBP	KNG1	MatrixDB	8710908;8710908;8710908;8710908
C1QBP	LMNA	MatrixDB	29568061
C1QBP	MMP14	MatrixDB	12220632;12220632
C1QBP	PDGFB	BioPlex 2.0	26186194;28514442
C1QBP	RSPO1	BioPlex 2.0	26186194;28514442
C1QBP	SERPINC1	MatrixDB	8900153;8900153;8900153
C1QBP	TFAM	MatrixDB	22904065;22904065;22904065
C1QBP	TFB2M	MatrixDB	22904065
C1QBP	TNFRSF1B	MatrixDB	14743216
C1QBP	VTN	MatrixDB;BioPlex 2.0	8900153;8900153;8900153;8900153;8900153;8900153;8900153;8900153;26186194;28514442
C1QC	C1QC	MatrixDB	7240
C1S	C1S	MatrixDB	12788922;2387866
C3	CFB	MatrixDB	19255449;19255449;19255449
C3	CFH	MatrixDB	21317894;21317894;21317894;21317894;21317894
C3	MAPT	MatrixDB	26402096
C3	TGM2	MatrixDB	21988832
C4A	CCL5	BioPlex 2.0	26186194;28514442
C4A	LGALS8	BioPlex 2.0	26186194;28514442
C4BPA	LBP	MatrixDB	21988832
C4BPA	SOD1	MatrixDB	26496610
CAMP	CAMP	MatrixDB	17060626
CCL1	CXCL11	MatrixDB	28381538
CCL11	CCL13	MatrixDB	28381538
CCL11	CCL2	MatrixDB	28381538
CCL11	CCL27	MatrixDB	28381538;28381538
CCL11	CCL28	MatrixDB	28381538;28381538
CCL11	CCL5	MatrixDB	28381538;28381538
CCL11	CCL8	MatrixDB	28381538
CCL11	CXCL1	MatrixDB	28381538
CCL11	CXCL10	MatrixDB	28381538;28381538
CCL11	CXCL11	MatrixDB	28381538
CCL11	CXCL12	MatrixDB	28381538;28381538
CCL11	CXCL2	MatrixDB	28381538
CCL11	CXCL6	MatrixDB	28381538
CCL11	DPP4	MatrixDB	18275857;21314817
CCL11	PF4	MatrixDB	28381538;28381538
CCL11	PF4V1	MatrixDB	28381538
CCL11	XCL1	MatrixDB	28381538
CCL13	CCL21	MatrixDB	28381538;28381538
CCL13	CCL24	MatrixDB	28381538
CCL13	CCL28	MatrixDB	28381538
CCL13	CCL5	MatrixDB	28381538;28381538;28381538
CCL13	CCL8	MatrixDB	28381538
CCL13	CXCL10	MatrixDB	28381538;28381538
CCL13	CXCL11	MatrixDB	28381538;28381538
CCL13	CXCL12	MatrixDB	28381538;28381538
CCL13	NPM1	MatrixDB	30021884
CCL13	PF4	MatrixDB	28381538;28381538
CCL13	PPBP	MatrixDB	28381538
CCL13	XCL1	MatrixDB	28381538;28381538
CCL15	CCL2	MatrixDB	28381538
CCL17	CCL21	MatrixDB	28381538;28381538
CCL17	CCL25	MatrixDB	28381538;28381538
CCL17	CCL28	MatrixDB	28381538;28381538;28381538
CCL17	CCL5	MatrixDB	28381538;28381538;28381538;28381538;28381538;28381538;28381538;28381538;28381538;28381538;28381538;28381538;28381538
CCL17	PF4	MatrixDB	28381538;28381538
CCL19	PF4V1	MatrixDB	28381538
CCL19	TNFAIP6	MatrixDB;Dataset PMID:29362135	27044744;27044744
CCL2	CCL5	MatrixDB	28381538;28381538
CCL2	CCL8	MatrixDB	28381538;28381538
CCL2	COL18A1	MatrixDB	12556525
CCL2	CXCL13	MatrixDB	28381538
CCL2	CXCL8	MatrixDB	28381538
CCL2	PF4	MatrixDB	28381538;28381538
CCL2	TNFAIP6	MatrixDB;Dataset PMID:29362135	27044744;27044744
CCL21	CCL23	MatrixDB	28381538
CCL21	CCL24	MatrixDB	28381538
CCL21	CCL28	MatrixDB	28381538;28381538
CCL21	CCL5	MatrixDB	28381538;28381538
CCL21	CXCL10	MatrixDB	28381538;28381538
CCL21	CXCL11	MatrixDB	28381538
CCL21	CXCL12	MatrixDB	28381538;28381538
CCL21	CXCL2	MatrixDB	28381538
CCL21	IGFBP7	SRB lab manual curation	12847218;12847218
CCL21	PF4	MatrixDB	28381538;28381538
CCL21	PF4V1	MatrixDB	28381538;28381538
CCL21	PPBP	MatrixDB	28381538
CCL21	TNFAIP6	MatrixDB;Dataset PMID:29362135	27044744;27044744
CCL21	XCL1	MatrixDB	28381538
CCL22	DPP4	MatrixDB	21314817
CCL22	LNPEP	BioPlex 2.0	26186194;28514442
CCL22	PF4V1	MatrixDB	28381538
CCL24	CCL5	MatrixDB	28381538;28381538;28381538
CCL24	CXCL11	MatrixDB	28381538;28381538
CCL24	XCL1	MatrixDB	28381538
CCL25	CCL5	MatrixDB	28381538;28381538
CCL25	CXCL11	MatrixDB	28381538
CCL25	CXCL12	MatrixDB	28381538;28381538
CCL25	PF4	MatrixDB	28381538;28381538;28381538
CCL25	PF4V1	MatrixDB	28381538;28381538
CCL27	CCL5	MatrixDB	28381538;28381538
CCL27	PF4V1	MatrixDB	28381538
CCL27	TNFAIP6	MatrixDB;Dataset PMID:29362135	27044744;27044744
CCL28	CCL5	MatrixDB	28381538;28381538
CCL28	CXCL10	MatrixDB	28381538;28381538
CCL28	CXCL12	MatrixDB	28381538;28381538
CCL28	CXCL13	MatrixDB	28381538
CCL28	CXCL2	MatrixDB	28381538
CCL28	PF4	MatrixDB	28381538;28381538;28381538
CCL28	PF4V1	MatrixDB	28381538
CCL28	PPBP	MatrixDB	28381538
CCL28	XCL1	MatrixDB	28381538
CCL3	CCL3	MatrixDB	20959807;20959807;20959807
CCL4	CCL4	MatrixDB	20959807;20959807;20959807
CCL5	CCL5	MatrixDB	23480650;15530372;21827949;21827949;21827949;21827949;28381538
CCL5	CCL8	MatrixDB	28381538
CCL5	CXCL10	MatrixDB	28381538;28381538
CCL5	CXCL11	MatrixDB	28381538;28381538
CCL5	CXCL12	MatrixDB	28381538;28381538;28381538;28381538;28381538;28381538;28381538
CCL5	CXCL2	MatrixDB	28381538;28381538
CCL5	CXCL6	MatrixDB	28381538;28381538
CCL5	DPP4	MatrixDB	21314817
CCL5	IGFBP7	SRB lab manual curation	12847218;12847218
CCL5	PF4	MatrixDB	28381538;28381538;28381538;28381538;28381538;28381538;28381538;28381538;28381538
CCL5	PPBP	MatrixDB	28381538;28381538
CCL5	TGFB1	MatrixDB	25640309
CCL5	TNFAIP6	MatrixDB;Dataset PMID:29362135	24501198;27044744;27044744;24501198
CCL5	XCL1	MatrixDB	28381538;28381538;28381538
CCL7	CXCL6	MatrixDB	28381538
CCL7	TNFAIP6	MatrixDB;Dataset PMID:29362135	27044744;27044744
CCL8	CXCL10	MatrixDB	28381538
CCL8	CXCL11	MatrixDB	28381538
CCL8	CXCL2	MatrixDB	28381538
CCL8	CXCL6	MatrixDB	28381538
CCL8	CXCL8	MatrixDB	28381538
CCL8	PPBP	MatrixDB	28381538
CD36	CHRD	MatrixDB	21988832
CD36	LYN	MatrixDB	20037584;20037584;20037584
CD36	TGFB1	MatrixDB	10487979
CD36	THBS1	MatrixDB	23640500;23640500
CD36	THBS1,THBS1,THBS1 CPX	SRB lab manual curation	9245797
CD44	FGF2	BioPlex 2.0	26186194;28514442
CD44	HGF	MatrixDB	22897854;22897854;22897854
CD44	HYAL2	MatrixDB	25864644
CD44	LAMA3	BioPlex 2.0	26186194;28514442
CD44	LGALS9	MatrixDB	25065622;25065622
CD44	MET	MatrixDB	22897854;22897854;22897854
CD44	TGM2	SRB lab manual curation	25449226
CD44	VCAN	BioPlex 2.0;MatrixDB	26186194;28514442
CD47	COMP	SRB lab manual curation	8550562
CD47	ITGA5	Adhesome	2277087
CD47	ITGAV	Adhesome	10545994
CD47	ITGB1	Adhesome	2277087; 10891456; 10397731; 11264185; 9529384
CD47	LGALS8	BioPlex 2.0	26186194;28514442
CD47	LGALS9	BioPlex 2.0	26186194;28514442
CD47	SNCA	MatrixDB	18614564
CD47	THBS1	SRB lab manual curation	8550562
CD47	THBS2	SRB lab manual curation	8550562
CD47	THBS3	SRB lab manual curation	8550562
CD47	THBS4	SRB lab manual curation	8550562
CDK1	HDGF	MatrixDB	21907836
CDK1	PGK1	MatrixDB	20360068
CDK1	TXN	MatrixDB	29128334;29128334
CDON	DHH	MatrixDB	20519495;20519495
CDON	IHH	MatrixDB	20519495
CDON	SHH	MatrixDB	18794898;18794898;18794898;18794898;18794898;18794898;20519495;17086203
CFB	HIST1H1A	MatrixDB	30021884
CFH	CFI	MatrixDB	19050261;19050261
CFH	PTX3	MatrixDB	19050261;19050261;19050261;19050261;19050261;19050261;19050261;19050261;19050261;19050261;19050261;19050261;19050261;19050261;19632990
CFH	THBS1,THBS1,THBS1 CPX	SRB lab manual curation	15634279
CFI	ECM1	BioPlex 2.0	26186194;28514442
CFI	PTX3	MatrixDB	19050261
CFP	F11R	MatrixDB	28480349
CFP	NCR1	MatrixDB	28480349;28480349;28480349;28480349;28480349;28480349
CFP	PTX3	MatrixDB	19632990
Chondroitin sulfate	COL1A1,COL1A1,COL1A2 CPX	MatrixDB	19542224
Chondroitin sulfate	COL4A1,COL4A1,COL4A2 CPX	MatrixDB	19542224
Chondroitin sulfate	THBS1,THBS1,THBS1 CPX	SRB lab manual curation	9949192
Chondroitin sulfate	PDGFB,PDGFB CPX	SRB lab manual curation	19631712
Chondroitin sulfate	COL6A1,COL6A2,COL6A3 CPX	MatrixDB	19542224
Chondroitin sulfate	AGRN	GO;UniProtKB	GO_REF:0000024
Chondroitin sulfate	SEMA3E	SRB lab manual curation	20375348
Chondroitin sulfate	CHUK	SRB lab manual curation	20375348
Chondroitin sulfate	NUDT21	SRB lab manual curation	20375348
Chondroitin sulfate	CTSV	SRB lab manual curation	15192101
Chondroitin sulfate	RPS6KA5	SRB lab manual curation	20375348
Chondroitin sulfate	MAP4K4	SRB lab manual curation	20375348
Chondroitin sulfate	PAK4	SRB lab manual curation	20375348
Chondroitin sulfate	SOD1	MatrixDB	3223905
Chondroitin sulfate	F2	SRB lab manual curation	9949192
Chondroitin sulfate	PLAU	SRB lab manual curation	9949192
Chondroitin sulfate	APOE	MatrixDB;Dataset PMID:24246365	10526164
Chondroitin sulfate	APP	UniProtKB
Chondroitin sulfate	FGF1	MatrixDB	24447999
Chondroitin sulfate	SERPINE2	SRB lab manual curation	9949192
Chondroitin sulfate	CTSD	SRB lab manual curation	19919557
Chondroitin sulfate	THBS1	MatrixDB	19542224
Chondroitin sulfate	FGF2	MatrixDB	24447999
Chondroitin sulfate	HGF	MatrixDB	8780385
Chondroitin sulfate	FLT1	SRB lab manual curation	20375348
Chondroitin sulfate	EFNA1	SRB lab manual curation	20375348
Chondroitin sulfate	PTN	GO;UniProtKB	26896299;16373346
Chondroitin sulfate	FGF7	MatrixDB	24447999
Chondroitin sulfate	TGM2	SRB lab manual curation	28199387
Chondroitin sulfate	ITGA6	SRB lab manual curation	20375348
Chondroitin sulfate	CTSS	SRB lab manual curation	23968158
Chondroitin sulfate	EPHB2	SRB lab manual curation	20375348
Chondroitin sulfate	TIMP3	SRB lab manual curation	25176127
Chondroitin sulfate	DCC	SRB lab manual curation	20375348
Chondroitin sulfate	CTSK	SRB lab manual curation	25422423;14645229;15192101
Chondroitin sulfate	CSNK1A1	SRB lab manual curation	20375348
Chondroitin sulfate	CSNK1D	SRB lab manual curation	20375348
Chondroitin sulfate	EFNA3	SRB lab manual curation	20375348
Chondroitin sulfate	PLK1	SRB lab manual curation	20375348
Chondroitin sulfate	FGF8	MatrixDB	24447999
Chondroitin sulfate	TNFAIP6	Dataset PMID:29362135	24403066;14707130;25135638;26685054;9237673;18806261;19729381
Chondroitin sulfate	COL18A1 PFRAG1 (PRO_0000005794)*	MatrixDB	19542224
Chondroitin sulfate	LOX PFRAG (PRO_0000018520)*	SRB lab manual curation	30082873
Chondroitin sulfate	APP PFRAG1 (PRO_0000000092)*	MatrixDB	19542224
Chondroitin sulfate	COASY	SRB lab manual curation	20375348
Chondroitin sulfate	PAK1	SRB lab manual curation	20375348
Chondroitin sulfate	PTPRS	GO;UniProtKB	GO_REF:0000024
Chondroitin sulfate	DPYSL3	GO;UniProtKB	GO_REF:0000024
Chondroitin sulfate	SEMA3A	SRB lab manual curation	23940048
Chondroitin sulfate	KCNAB1	SRB lab manual curation	20375348
Chondroitin sulfate	ACOX1	SRB lab manual curation	20375348
Chondroitin sulfate	PCOLCE	MatrixDB	24117177
Chondroitin sulfate	SHH	SRB lab manual curation	24062467
Chondroitin sulfate	IGFBP7	SRB lab manual curation	12847218
Chondroitin sulfate	HADH	SRB lab manual curation	20375348
Chondroitin sulfate	PRRC2B	SRB lab manual curation	20375348
Chondroitin sulfate	NPNT	MatrixDB	23357641
Chondroitin sulfate	UNC5A	SRB lab manual curation	20375348
Chondroitin sulfate	PPP1R32	SRB lab manual curation	20375348
Chondroitin sulfate	RTN4RL1	GO;UniProtKB	GO_REF:0000024
Chondroitin sulfate	KRTAP13-1	SRB lab manual curation	20375348
Chondroitin sulfate	GADD45GIP1	SRB lab manual curation	20375348
Chondroitin sulfate	NUDT16L1	SRB lab manual curation	20375348
Chondroitin sulfate	RTN4R	GO;UniProtKB	GO_REF:0000024
Chondroitin sulfate	SEMA6B	SRB lab manual curation	20375348
Chondroitin sulfate	NTN4	SRB lab manual curation	20375348
Chondroitin sulfate	ROBO2	SRB lab manual curation	20375348
Chondroitin sulfate	HOMER2	SRB lab manual curation	20375348
Chondroitin sulfate	PLA2G3	SRB lab manual curation	9848887
Chondroitin sulfate	SLAIN2	SRB lab manual curation	20375348
Chondroitin sulfate	OPTC	SRB lab manual curation	20375348
Chondroitin sulfate	ADGRE2	GO;UniProtKB	12829604
CHRD	HRG	MatrixDB	21988832
CHUK	TNF	MatrixDB	26649818;26649818
CLEC3B	GSK3B	MatrixDB	21900206
CLU	PRNP	MatrixDB	15146195
CLU	TNC	MatrixDB	21349332
COIL	FGF12	MatrixDB	25416956;25416956;25416956
COIL	HABP4	MatrixDB	19523114
COL11A1	COL11A1	MatrixDB	22038862
COL11A1	COL11A2	MatrixDB	22038862
COL11A1	COL2A1	MatrixDB	22038862
COL11A1	COL9A1	MatrixDB	22038862
COL11A1	COMP	MatrixDB	22038862
COL11A1	HSPG2	MatrixDB	22038862
COL11A1	NCL	MatrixDB	22038862
COL11A1	SOST	MatrixDB	22206666
COL11A1	TF	MatrixDB	22038862
COL11A1	THBS1	MatrixDB	22038862;22038862;22038862
COL12A1	MMP2	BioPlex 2.0	26186194;28514442
COL12A1	MMP9	BioPlex 2.0	26186194;28514442
COL13A1,COL13A1,COL13A1 CPX	FN1	MatrixDB	16091016;16091016;16091016;11956183;11956183
COL13A1,COL13A1,COL13A1 CPX	HSPG2	MatrixDB	11956183
COL13A1,COL13A1,COL13A1 CPX	ITGA1	MatrixDB	10713152
COL14A1	ENO1	MatrixDB	23414517
COL14A1	MMP2	BioPlex 2.0	26186194;28514442
COL14A1	MMP9	BioPlex 2.0	26186194;28514442
COL14A1	PRELP	BioPlex 2.0	26186194;28514442
COL18A1	COL18A1	MatrixDB	20932905;20932905;11956183
COL18A1	MMP2	BioPlex 2.0	26186194;28514442
COL18A1	MMP9	BioPlex 2.0	26186194;28514442
COL18A1	PTCH1	BioPlex 2.0	26186194;28514442
COL18A1	SELL	MatrixDB	12556525
COL18A1	SELP	MatrixDB	12556525
COL18A1 PFRAG1 (PRO_0000005794)*	COL18A1 PFRAG1 (PRO_0000005794)*	MatrixDB	9724722;16269408;16269408;16269408;16269408
COL18A1 PFRAG1 (PRO_0000005794)*	COL1A1,COL1A1,COL1A2 CPX	MatrixDB	19542224;19542224
COL18A1 PFRAG1 (PRO_0000005794)*	COL4A1,COL4A1,COL4A2 CPX	MatrixDB	19542224
COL18A1 PFRAG1 (PRO_0000005794)*	COL6A1,COL6A2,COL6A3 CPX	MatrixDB	19542224;19542224
COL18A1 PFRAG1 (PRO_0000005794)*	FLT1	MatrixDB	12029087
COL18A1 PFRAG1 (PRO_0000005794)*	HSPG2	MatrixDB	9687493;10966814
COL18A1 PFRAG1 (PRO_0000005794)*	ITGA5	MatrixDB	17615292
COL18A1 PFRAG1 (PRO_0000005794)*	ITGA5,ITGB1 CPX	MatrixDB	11158588;12359771;12682293;19502598;19502598;19502598;19542224
COL18A1 PFRAG1 (PRO_0000005794)*	ITGAV,ITGB3 CPX	MatrixDB	19502598;19502598;19502598;19542224
COL18A1 PFRAG1 (PRO_0000005794)*	ITGAV,ITGB5 CPX	MatrixDB	19502598
COL18A1 PFRAG1 (PRO_0000005794)*	ITGB1	MatrixDB	17615292
COL18A1 PFRAG1 (PRO_0000005794)*	KDR	MatrixDB	12029087
COL18A1 PFRAG1 (PRO_0000005794)*	LAMA1,LAMB1,LAMC1 CPX	MatrixDB	14695535;17615292
COL18A1 PFRAG1 (PRO_0000005794)*	LAMA1,LAMB1,LAMC1,NID1 CPX	MatrixDB	9687493;10966814
COL18A1 PFRAG1 (PRO_0000005794)*	MMP2	MatrixDB	17615292
COL18A1 PFRAG1 (PRO_0000005794)*	MMP9	MatrixDB	12690120
COL18A1 PFRAG1 (PRO_0000005794)*	NCL	MatrixDB	17615292;17615292;17615292;17615292;17615292;19877579;19877579;19877579;19877579;17615292;17615292;19877579
COL18A1 PFRAG1 (PRO_0000005794)*	NGF	SRB lab manual curation	20846515
COL18A1 PFRAG1 (PRO_0000005794)*	PCOLCE	MatrixDB	24117177;24117177;24117177;24117177
COL18A1 PFRAG1 (PRO_0000005794)*	SPARC	MatrixDB	19542224
COL18A1 PFRAG1 (PRO_0000005794)*	TGM2	MatrixDB	19542224;19542224
COL18A1 PFRAG1 (PRO_0000005794)*	THBS1	MatrixDB	19542224
COL18A1 PFRAG2 (PRO_0000441861)*	COL4A1,COL4A1,COL4A2 CPX	MatrixDB	19542224
COL18A1 PFRAG2 (PRO_0000441861)*	COL6A1,COL6A2,COL6A3 CPX	MatrixDB	19542224
COL18A1 PFRAG2 (PRO_0000441861)*	HSPG2	MatrixDB	9687493;10966814
COL18A1 PFRAG2 (PRO_0000441861)*	ITGA5,ITGB1 CPX	MatrixDB	19502598;19502598;19502598;19502598;19542224
COL18A1 PFRAG2 (PRO_0000441861)*	ITGAV,ITGB3 CPX	MatrixDB	19502598;19502598;19502598;19502598;19542224
COL18A1 PFRAG2 (PRO_0000441861)*	LAMA1,LAMB1,LAMC1 CPX	MatrixDB	12237301;12237301;19542224
COL18A1 PFRAG2 (PRO_0000441861)*	LAMA1,LAMB1,LAMC1,NID1 CPX	MatrixDB	9687493;10966814
COL18A1 PFRAG2 (PRO_0000441861)*	SPARC	MatrixDB	19542224
COL18A1 PFRAG2 (PRO_0000441861)*	TGM2	MatrixDB	19542224
COL18A1 PFRAG2 (PRO_0000441861)*	THBS1	MatrixDB	19542224
COL1A1	COL1A2	MatrixDB	16751282
COL1A1	COL5A1	MatrixDB;SRB lab manual curation	20979576;20979576
COL1A1	FN1	MatrixDB	25290767;20541508
COL1A1	LOX PFRAG (PRO_0000018520)*	MatrixDB	21690299
COL1A1	POSTN	MatrixDB	20654714
COL1A1	SOST	MatrixDB	22206666
COL1A1,COL1A1,COL1A2 CPX	COL1A1,COL1A1,COL1A2 CPX	MatrixDB	19442729
COL1A1,COL1A1,COL1A2 CPX	COL5A1	MatrixDB	20979576;20979576
COL1A1,COL1A1,COL1A2 CPX	COL6A1,COL6A2,COL6A3 CPX	SRB lab manual curation	9334230
COL1A1,COL1A1,COL1A2 CPX	HGF	MatrixDB	8780385
COL1A1,COL1A1,COL1A2 CPX	ITGA1	MatrixDB	10713152
COL1A1,COL1A1,COL1A2 CPX	ITGA2B,ITGB3 CPX	SRB lab manual curation	8240284
COL1A1,COL1A1,COL1A2 CPX	LOX PFRAG (PRO_0000018520)*	MatrixDB;SRB lab manual curation	30082873;30082873;30082873
COL1A1,COL1A1,COL1A2 CPX	MAG	SRB lab manual curation	2446864
COL1A1,COL1A1,COL1A2 CPX	MMP2	MatrixDB;SRB lab manual curation	23085623;23085623;23085623;19698785
COL1A1,COL1A1,COL1A2 CPX	MMP9	SRB lab manual curation	19698785
COL1A1,COL1A1,COL1A2 CPX	PCOLCE	MatrixDB	24117177
COL1A1,COL1A1,COL1A2 CPX	PDGFB,PDGFB CPX	MatrixDB	9692901
COL1A1,COL1A1,COL1A2 CPX	SPARC	MatrixDB	2982834;19542224;2745554;16255572;16255572;2745554;7034958
COL1A1,COL1A1,COL1A2 CPX	TGM2	MatrixDB	19542224
COL1A1,COL1A1,COL1A2 CPX	THBS1	MatrixDB	19542224
COL1A1,COL1A1,COL1A2 CPX	THBS1,THBS1,THBS1 CPX	SRB lab manual curation	29844053;3571333;9328841;29844053
COL1A1,COL1A1,COL1A2 CPX	THBS4	SRB lab manual curation	10956668
COL1A1,COL1A1,COL1A2 CPX	THBS4,THBS4,THBS4,THBS4,THBS4 CPX	SRB lab manual curation	10956668
COL1A1,COL1A1,COL1A2 CPX	TNFRSF11B,TNFRSF11B CPX	SRB lab manual curation	15799029
COL1A1,COL1A1,COL1A2 CPX	VTN	MatrixDB;SRB lab manual curation	9164872;2430969
COL1A2	COL3A1,COL3A1,COL3A1 CPX	SRB lab manual curation	23530037
COL1A2	COL5A1	MatrixDB;SRB lab manual curation	20979576;20979576
COL1A2	COMT	MatrixDB	26496610
COL1A2	CTSK	MatrixDB	19010413
COL1A2	LOX PFRAG (PRO_0000018520)*	MatrixDB	21690299
COL1A2	MMP14	MatrixDB	19010413
COL1A2	MMP2	MatrixDB	19010413
COL1A2	MMP9	MatrixDB	19010413
COL23A1	COL23A1	MatrixDB	12644459;12644459
COL23A1	LMNA	MatrixDB	30021884
COL2A1	COL2A1	MatrixDB	22248926;22248926
COL2A1	COL9A1	BioPlex 2.0	26186194;28514442
COL2A1	HYAL1	MatrixDB	21988832
COL2A1	MMP2	BioPlex 2.0	26186194;28514442
COL2A1	MMP9	BioPlex 2.0	26186194;28514442
COL2A1	SOST	MatrixDB	22206666
COL2A1,COL11A1,COL11A2 CPX	ITGAV,ITGB3 CPX	MatrixDB	19542224
COL2A1,COL11A1,COL11A2 CPX	SPARC	MatrixDB	19542224
COL2A1,COL11A1,COL11A2 CPX	TGM2	MatrixDB	19542224;19542224
COL2A1,COL11A1,COL11A2 CPX	THBS1	MatrixDB	19542224
COL3A1	COL3A1	MatrixDB	23001006
COL3A1	LOX PFRAG (PRO_0000018520)*	MatrixDB	21690299
COL3A1	SPARC	MatrixDB	19011090;19011090;19011090;19011090
COL3A1	TNF	MatrixDB	17623297
COL3A1,COL3A1,COL3A1 CPX	ELANE	MatrixDB	19398000;19398000;19398000;19398000
COL3A1,COL3A1,COL3A1 CPX	FN1	SRB lab manual curation	23530037
COL3A1,COL3A1,COL3A1 CPX	ITGA1	MatrixDB	10713152
COL3A1,COL3A1,COL3A1 CPX	MAG	SRB lab manual curation	2446864
COL3A1,COL3A1,COL3A1 CPX	PDGFB,PDGFB CPX	MatrixDB	9692901
COL3A1,COL3A1,COL3A1 CPX	SPARC	MatrixDB	2040276;2745554;2745554
COL3A1,COL3A1,COL3A1 CPX	THBS1,THBS1,THBS1 CPX	SRB lab manual curation	29844053
COL3A1,COL3A1,COL3A1 CPX	THBS4	SRB lab manual curation	23530037
COL3A1,COL3A1,COL3A1 CPX	THBS4,THBS4,THBS4,THBS4,THBS4 CPX	SRB lab manual curation	10956668
COL3A1,COL3A1,COL3A1 CPX	VTN	SRB lab manual curation	2430969
COL4A1	COL4A1	MatrixDB	24906154
COL4A1	COL4A2	MatrixDB	12011424
COL4A1	MMP2	BioPlex 2.0	26186194;28514442
COL4A1	MMP9	BioPlex 2.0	26186194;28514442
COL4A1,COL4A1,COL4A2 CPX	COL6A1,COL6A2,COL6A3 CPX	SRB lab manual curation	9334230
COL4A1,COL4A1,COL4A2 CPX	HGF	MatrixDB	8780385
COL4A1,COL4A1,COL4A2 CPX	HSPG2	SRB lab manual curation	10092882
COL4A1,COL4A1,COL4A2 CPX	IGFBP7	SRB lab manual curation	12847218
COL4A1,COL4A1,COL4A2 CPX	ITGA1	MatrixDB	10713152
COL4A1,COL4A1,COL4A2 CPX	MAG	SRB lab manual curation	2446864
COL4A1,COL4A1,COL4A2 CPX	MMP2	SRB lab manual curation	19698785
COL4A1,COL4A1,COL4A2 CPX	PCOLCE	MatrixDB	24117177
COL4A1,COL4A1,COL4A2 CPX	PDGFB,PDGFB CPX	MatrixDB	9692901
COL4A1,COL4A1,COL4A2 CPX	SPARC	MatrixDB	7563094;9692901
COL4A1,COL4A1,COL4A2 CPX	TGM2	MatrixDB	19542224
COL4A1,COL4A1,COL4A2 CPX	THBS1,THBS1,THBS1 CPX	SRB lab manual curation	3571333
COL4A1,COL4A1,COL4A2 CPX	TNFRSF11B,TNFRSF11B CPX	SRB lab manual curation	15799029
COL4A1,COL4A1,COL4A2 CPX	VTN	SRB lab manual curation	2430969
COL4A2	COLQ	BioPlex 2.0	26186194;28514442
COL4A2	MMP2	BioPlex 2.0	26186194;28514442
COL4A2	MMP9	BioPlex 2.0	26186194;28514442
COL5A1	COL6A1,COL6A2,COL6A3 CPX	MatrixDB	20979576
COL5A1	COL6A3	MatrixDB	20979576
COL5A1	FN1	MatrixDB	20979576;20979576
COL5A1	MMP2	MatrixDB;BioPlex 2.0;SRB lab manual curation	20979576;20979576;26186194;28514442;20979576
COL5A1	MMP9	BioPlex 2.0	26186194;28514442
COL5A1	PCOLCE	MatrixDB	20979576;20979576
COL5A1	SOST	MatrixDB	22206666
COL5A1	TGFB1	MatrixDB	20979576;20979576
COL5A1	TGM2	MatrixDB	26496610
COL5A1	TNC	MatrixDB;SRB lab manual curation	20979576;20979576;20979576
COL5A1,COL5A1,COL5A2 CPX	COL6A1,COL6A2,COL6A3 CPX	MatrixDB	20979576
COL5A1,COL5A1,COL5A2 CPX	IGFBP7	SRB lab manual curation	12847218
COL5A1,COL5A1,COL5A2 CPX	ITGA1	MatrixDB	10713152
COL5A1,COL5A1,COL5A2 CPX	MAG	SRB lab manual curation	2446864
COL5A1,COL5A1,COL5A2 CPX	SPARC	MatrixDB	8626499
COL5A1,COL5A1,COL5A2 CPX	THBS1,THBS1,THBS1 CPX	SRB lab manual curation	3571333
COL5A1,COL5A1,COL5A2 CPX	THBS4	SRB lab manual curation	10956668
COL5A1,COL5A1,COL5A2 CPX	THBS4,THBS4,THBS4,THBS4,THBS4 CPX	SRB lab manual curation	10956668
COL5A1,COL5A1,COL5A2 CPX	VTN	SRB lab manual curation	2430969
COL5A2	TGM2	MatrixDB	26496610
COL5A3	NEK4	MatrixDB	25798074
COL6A1,COL6A2,COL6A3 CPX	COL6A1,COL6A2,COL6A3 CPX	SRB lab manual curation	9334230
COL6A1,COL6A2,COL6A3 CPX	FN1	SRB lab manual curation	9334230
COL6A1,COL6A2,COL6A3 CPX	ITGAV,ITGB3 CPX	MatrixDB	19542224
COL6A1,COL6A2,COL6A3 CPX	MAG	SRB lab manual curation	2446864
COL6A1,COL6A2,COL6A3 CPX	PCOLCE	MatrixDB	24117177;24117177
COL6A1,COL6A2,COL6A3 CPX	PDGFB,PDGFB CPX	MatrixDB	9692901
COL6A1,COL6A2,COL6A3 CPX	SPARC	MatrixDB	2040276
COL6A1,COL6A2,COL6A3 CPX	TGM2	MatrixDB	19542224
COL6A1,COL6A2,COL6A3 CPX	THBS1	MatrixDB	19542224
COL6A1,COL6A2,COL6A3 CPX	VTN	SRB lab manual curation	2430969
COL6A3	COL6A3	MatrixDB	24332716
COL6A3	NEK4	MatrixDB	25798074
COL9A1	COMP	SRB lab manual curation	23530037
COL9A1	FN1	SRB lab manual curation	23530037;21768108;21768108;21768108
COL9A1,COL9A2,COL9A3 CPX	FN1	SRB lab manual curation	21768108
COL9A1,COL9A2,COL9A3 CPX	MAG	SRB lab manual curation	2446864
COLQ	FN1	BioPlex 2.0	26186194;28514442
COMP	COMP	MatrixDB	17889519
COMP	ECM1	MatrixDB	20138147;20138147
COMT	FGF2	MatrixDB	26496610
COMT	FN1	MatrixDB	19738201
CP	MAPT	MatrixDB	26402096;26402096
CP	SOST	MatrixDB	22206666
CPD	TNF	BioPlex 2.0	26186194;28514442
CSNK1A1	HMGB1	MatrixDB	12062430;12062430
CSNK1D	MAPT	MatrixDB	17101137
CSNK1D	SNCA	MatrixDB	25241761
CSNK1E	MIF	MatrixDB	20360068
CSNK1E	PGK1	MatrixDB	20360068
CSNK1E	PRDX4	MatrixDB	23455922
CTGF	FGFR1OP	MatrixDB	23142580
CTGF	FGFR2	MatrixDB	23142580
CTGF	FGFR3	MatrixDB	23142580
CTGF	FN1	MatrixDB	16457822;16457822;16457822;16457822;16457822
CTGF	ITGA5	MatrixDB	16457822
CTNNA1	CTSV	MatrixDB	24412244
CTSD	RBM8A	MatrixDB	26496610
CTSG	FN1	MatrixDB	8408036
CTSG	THBS1,THBS1,THBS1 CPX	MatrixDB	8408036;8408036
CTSK	CTSV	BioPlex 2.0	26186194;28514442
CTSK	FGFR3	MatrixDB	16169070
CTSK	SPARC	MatrixDB	8647860
CTSS	F11R	MatrixDB	25086747
CTSS	OCLN	MatrixDB	25086747
CTSV	DCC	MatrixDB	24412244
CTSV	KNG1	BioPlex 2.0	26186194;28514442
CTSV	SRC	MatrixDB	24412244
CTSZ	PLK2	MatrixDB	26496610
CX3CL1	FGG	MatrixDB	24789099
CX3CL1	ITGA5	MatrixDB	23125415
CX3CL1	ITGB1	MatrixDB	24789099;24789099
CX3CL1	ITGB3	MatrixDB	24789099;24789099;23125415;23125415;23125415;23125415;23125415
CXCL1	CXCL6	MatrixDB	28381538
CXCL10	CXCL11	MatrixDB	28381538
CXCL10	CXCL12	MatrixDB	28381538;28381538
CXCL10	CXCL6	MatrixDB	28381538
CXCL10	DPP4	MatrixDB	18275857;21314817
CXCL10	IGFBP7	SRB lab manual curation	12847218;12847218
CXCL10	PF4	MatrixDB	28381538;28381538
CXCL10	PF4V1	MatrixDB	28381538
CXCL10	PPBP	MatrixDB	28381538
CXCL10	XCL1	MatrixDB	28381538
CXCL11	CXCL12	MatrixDB	28381538;28381538;28381538
CXCL11	CXCL2	MatrixDB	28381538
CXCL11	DPP4	MatrixDB	18275857;21314817
CXCL11	PF4	MatrixDB	28381538;28381538
CXCL11	PF4V1	MatrixDB	28381538;28381538
CXCL11	PPBP	MatrixDB	28381538
CXCL11	TNFAIP6	MatrixDB;Dataset PMID:29362135	24501198;27044744;27044744;24501198
CXCL11	XCL1	MatrixDB	28381538
CXCL12	CXCL12	MatrixDB	28381538
CXCL12	CXCL2	MatrixDB	28381538;28381538
CXCL12	CXCL6	MatrixDB	28381538;28381538
CXCL12	DPP4	MatrixDB	18275857;18275857;21314817
CXCL12	PDIA6	MatrixDB	30021884
CXCL12	PF4	MatrixDB	28381538;28381538;28381538;28381538
CXCL12	PF4V1	MatrixDB	28381538;28381538;28381538;28381538
CXCL12	PPBP	MatrixDB	28381538
CXCL12	TNFAIP6	MatrixDB;Dataset PMID:29362135	27044744;27044744
CXCL12	XCL1	MatrixDB	28381538;28381538
CXCL13	PF4V1	MatrixDB	28381538
CXCL2	CXCL6	MatrixDB	28381538
CXCL2	DPP4	MatrixDB	18275857;21314817
CXCL2	PF4	MatrixDB	28381538;28381538;28381538
CXCL2	XCL1	MatrixDB	28381538
CXCL6	PF4	MatrixDB	28381538;28381538
CXCL6	PPBP	MatrixDB	28381538
CXCL8	PF4	MatrixDB	28381538;28381538
CXCL8	TNFAIP6	MatrixDB;Dataset PMID:29362135	24501198;24501198;24501198;24501198;24501198;24501198;24501198;24501198;24501198;24501198;24501198;24501198;24501198;24501198
CYR61	SOST	MatrixDB	22206666
CYR61	ZNF207	MatrixDB	26496610
DAPK3	ENPP3	MatrixDB	30021884
DCC	NTN1	MatrixDB	26190107;26190107;19721007;20434207
DCC	NTN4	MatrixDB	19721007
DDX19B	FGA	BioPlex 2.0	26186194;28514442
DDX19B	FGB	BioPlex 2.0	26186194;28514442
DDX19B	FGG	BioPlex 2.0	26186194;28514442
DDX19B	S100A9	BioPlex 2.0	26186194;28514442
DDX19B	SERPINA1	BioPlex 2.0	26186194;28514442
DDX54	FGF3	BioPlex 2.0	26186194;28514442
DDX54	FGF8	BioPlex 2.0	26186194;28514442
DDX54	PDGFB	BioPlex 2.0	26186194;28514442
DDX54	SEMA4A	MatrixDB	21988832
DEFA5	LTBP1	BioPlex 2.0	26186194;28514442
DEFA5	SULF2	BioPlex 2.0	26186194;28514442
Dermatan sulfate	LAMA1,LAMB1,LAMC1 CPX	MatrixDB	19542224
Dermatan sulfate	COL1A1,COL1A1,COL1A2 CPX	MatrixDB	19542224
Dermatan sulfate	COL4A1,COL4A1,COL4A2 CPX	MatrixDB	19542224
Dermatan sulfate	COL6A1,COL6A2,COL6A3 CPX	MatrixDB	19542224
Dermatan sulfate	SOD1	MatrixDB	3223905
Dermatan sulfate	APOE	MatrixDB;Dataset PMID:24246365	10526164
Dermatan sulfate	SLPI	MatrixDB	9593692
Dermatan sulfate	THBS1	MatrixDB	19542224
Dermatan sulfate	SPARC	MatrixDB	19542224
Dermatan sulfate	CCL2	Dataset PMID:24246365	20097750
Dermatan sulfate	TGM2	SRB lab manual curation	28199387
Dermatan sulfate	TNC	MatrixDB	7533163
Dermatan sulfate	CTSK	SRB lab manual curation	25422423;14645229
Dermatan sulfate	TNFAIP6	Dataset PMID:29362135	19729381
Dermatan sulfate	COL18A1 PFRAG1 (PRO_0000005794)*	MatrixDB	19542224
Dermatan sulfate	LOX PFRAG (PRO_0000018520)*	SRB lab manual curation	30082873
Dermatan sulfate	APP PFRAG1 (PRO_0000000092)*	MatrixDB	19542224
Dermatan sulfate	PCOLCE	MatrixDB	24117177
Dermatan sulfate	IGFBP7	SRB lab manual curation	12847218
DNM2	HMGB1	MatrixDB	21900206
DPP4	DPP4	MatrixDB	22001206;22001206;22001206;22001206;22001206;22001206;22001206;22001206;22001206;22001206;22001206;22001206
DPP4	FN1	MatrixDB	19804410
DPYSL3	ODF2	MatrixDB	26496610
DPYSL3	PSEN1	MatrixDB	27036734
ECE1	LGALS8	BioPlex 2.0	26186194;28514442
ECE1	LGALS9	BioPlex 2.0	26186194;28514442
ECM1	FBN2	MatrixDB	19275936
ECM1	FN1	MatrixDB;SRB lab manual curation	19275936;16512877
ECM1	GRN	MatrixDB	19275936
ECM1	LAMC2	MatrixDB	19275936
ECM1	MMP9	SRB lab manual curation	16512877
ECM1	SRPK1	MatrixDB	23602568
ECM1	THBS1	MatrixDB	19275936
EFNA1	EPHA2	MatrixDB	19525919;19525919;19573808;19573808;19573808;19573808;19573808;20505120;22244754
EFNA1	EPHA4	MatrixDB	19836338
EFNA1	EPHA7	MatrixDB	22036564;22036564
EFNA1	PPBP	MatrixDB	16169070;21900206
EFNA4	EPHA4	MatrixDB	19836338
EFNA4	EPHA7	MatrixDB	22036564
EFNA5	EPHA2	MatrixDB	20228801;20228801;20228801;20505120;20505120;20505120
EFNA5	EPHA3	MatrixDB	19823572
EFNA5	EPHA4	MatrixDB	19836338;23812375
EFNA5	EPHA7	MatrixDB	22036564
EFNA5	EPHB2	MatrixDB	15107857
EFNB2	EPHB4	MatrixDB	26481148;26481148
EIF3G	SNCA	MatrixDB	21900206
EIF5	FN1	MatrixDB	19738201
ELANE	FN1	SRB lab manual curation	8463250
ELANE	SERPINA1	MatrixDB	16321984
ELANE	SLPI	MatrixDB	18421166
ELANE	THBS1,THBS1,THBS1 CPX	SRB lab manual curation	8463250
ELN	ELN	MatrixDB	18450438;18450438;18450438;18450438;18450438
ELN	LOX PFRAG (PRO_0000018520)*	MatrixDB;SRB lab manual curation	30082873;30082873
ELN	MMP7	MatrixDB	20345904
ELN	MMP9	MatrixDB	20345904
ENO1	FN1	MatrixDB	19738201
ENO1	ITGB1	MatrixDB	23414517
ENO1	NEK4	MatrixDB	25798074
ENO1	P4HB	MatrixDB	23414517
ENO1	PSEN1	MatrixDB	27036734;27036734;27036734
ENPP1	ENPP1	MatrixDB	23041369;23041369
ENPP1	INSR	MatrixDB	11289049;11289049
EPHA3	EPHA7	MatrixDB	22036564
EPHA3	SRPK1	MatrixDB	23602568
EPHA7	SMOC1	BioPlex 2.0	26186194;28514442
ERBB2	ERBB4	MatrixDB	10572067;16767099;24557338;21203579
ERBB2	HPSE	MatrixDB	26496610
ERBB2	NRG1	MatrixDB	7592681
ERBB2	TFRC	MatrixDB	24189400;26496610
ERBB2	TGFB1	MatrixDB	24412244
ERBB4	ERBB4	MatrixDB	18334220
F10	PCOLCE	MatrixDB	24117177
F11	F11	MatrixDB	16699514;17884987;17884987;17884987;17884987
F2	F8	MatrixDB	18492805
F2	FGA	MatrixDB	25241761
F2	HGF	MatrixDB	8780385
F2	SERPINA5	MatrixDB	18362344
F8	F8	MatrixDB	18400180
F8	VWF	MatrixDB	18492805
F9	SERPINC1	MatrixDB	20080729
FBN1	FBN1	MatrixDB	19755719;19755719;19755719;19755719;19755719;19755719;19755719;25034023;18448684;18448684;18448684;18448684;24035709
FBN1	FBN2	MatrixDB	19755719;25034023;25034023
FBN1	FN1	MatrixDB	19755719;25034023;25034023
FBN1	GRN	MatrixDB	19755719
FBN1	HSPG2	MatrixDB	19755719;19755719;19755719
FBN1	IGFBP3	MatrixDB	19755719
FBN1	IGFBP5	MatrixDB	19755719
FBN1	IGFBP7	MatrixDB	19755719
FBN1	LMNA	MatrixDB	19755719;19755719
FBN1	LTBP1	MatrixDB	12429738;12429738;12429738;12429738
FBN1	SERPINE1	MatrixDB	19755719;19755719;19755719;19755719;19755719
FBN1	TGFB2	MatrixDB	19755719
FBN1	THBS1	MatrixDB	19755719
FBN2	FBN2	MatrixDB	25034023
FBN2	FN1	MatrixDB	25034023;25034023
FBN2	LTBP1	MatrixDB	12429738;12429738
FBN2	THBS1	SRB lab manual curation	9840442
FCGRT	SERPINC1	BioPlex 2.0	26186194;28514442
FCGRT	THBS1	BioPlex 2.0	26186194;28514442
FES	KIT	MatrixDB	24728074;24728074
FES	MET	MatrixDB	24728074
FGA,FGA,FGB,FGB,FGG,FGG CPX	ITGA2B,ITGB3 CPX	SRB lab manual curation	8240284
FGA,FGA,FGB,FGB,FGG,FGG CPX	ITGAM	MatrixDB	22100634
FGA,FGA,FGB,FGB,FGG,FGG CPX	PLG	SRB lab manual curation	6438154
FGA,FGA,FGB,FGB,FGG,FGG CPX	THBS1,THBS1,THBS1 CPX	SRB lab manual curation	6690483;6489349;6213638;11094060
FGB	KIAA1143	BioPlex 2.0	26186194;28514442
FGB	PAK1	BioPlex 2.0	26186194;28514442
FGB	PPID	BioPlex 2.0	26186194;28514442
FGF1	FGF1	MatrixDB	11432880
FGF1	FGFR1	MatrixDB	18441324;10830168;25241761;22244757
FGF1	FGFR2	MatrixDB	10618369;25241761;11069186;11069186
FGF1	FGFR3	MatrixDB	14732692;14732692;14732692;22244757
FGF1	FGFR4	MatrixDB	25241761
FGF1	HSPG2	MatrixDB	24509440;24509440
FGF1	ITGAV,ITGB3 CPX	MatrixDB	18441324;18441324
FGF1	SRPK1	MatrixDB	23602568
FGF1	TGFBR3	BioPlex 2.0	26186194;28514442
FGF10	FGFR2	MatrixDB	12591959;25241761
FGF10	HIST1H1A	BioPlex 2.0	26186194;28514442
FGF10	ITIH2	BioPlex 2.0	26186194;28514442
FGF10	TNC	SRB lab manual curation	23637968
FGF12	SCN5A	MatrixDB	22705208;22705208;22705208;22705208
FGF12	SRPK1	MatrixDB	23602568
FGF17	TNC	SRB lab manual curation	23637968
FGF18	TNC	SRB lab manual curation	23637968
FGF19	FGFR1	MatrixDB	19706524
FGF19	FGFR4	MatrixDB	19706524
FGF2	FGFBP1	MatrixDB	16257968;16257968;16257968
FGF2	FGFR1	MatrixDB	10490103;11030354;23597562;23597563;26267536;17086194;23597562;26267536;17086194
FGF2	FGFR2	BioPlex 2.0;MatrixDB	26186194;28514442
FGF2	FN1	SRB lab manual curation	15492277
FGF2	HSPG2	MatrixDB	19422911;24509440
FGF2	PTX3	MatrixDB	20363749;20363749;20363749;20363749;20363749;20363749;20363749;22267482;22267482;22267482;20363749;20363749;22267482;22267482;22267482
FGF2	THBS1,THBS1,THBS1 CPX	SRB lab manual curation	12947001
FGF2	TNC	SRB lab manual curation	23637968
FGF20	FGF9	BioPlex 2.0	26186194;28514442
FGF23	FGFR1	MatrixDB	19966287;17086194
FGF23	FGFR2	MatrixDB	25241761
FGF23	FGFR3	MatrixDB	19966287
FGF23	FGFR4	MatrixDB	19966287
FGF4	TNC	SRB lab manual curation	23637968
FGF5	FGFR2	MatrixDB	25241761
FGF5	FGFR4	MatrixDB	25241761
FGF6	TNC	SRB lab manual curation	23637968
FGF7	FGFR2	MatrixDB	1309608;1309608
FGF7	HSPG2	MatrixDB	10702276
FGF7	TNC	SRB lab manual curation	23637968
FGF8	FGFR1	MatrixDB	25241761;22244757
FGF8	FGFR2	MatrixDB	25241761
FGF8	FGFR3	MatrixDB	22244757
FGF8	SRPK1	BioPlex 2.0	26186194;28514442
FGF8	TNC	SRB lab manual curation	23637968
FGF9	PPID	BioPlex 2.0	26186194;28514442
FGFR1	FGFR1	MatrixDB	19696444;19696444;19696444;20133753
FGFR1	HSPG2	MatrixDB	24509440;24509440
FGFR1	MAG	MatrixDB	18296487
FGFR2	FGFR2	MatrixDB	22726438;22726438;19060208
FGFR2	FGFR3	MatrixDB	23972473
FGFR2	GLCE	MatrixDB	25640309
FGFR2	HSPG2	MatrixDB	22421594
FGFR2	MMP14	MatrixDB	20798051
FGFR2	NCAM1	MatrixDB	21710437;21710437
FGFR3	FGFR3	MatrixDB	14732692;23972473;24120763;24120763
FGFR3	HSPG2	MatrixDB	24509440
FGFR4	FGFRL1	MatrixDB	18296487;18296487
FGFR4	GLCE	MatrixDB	25640309
FGFR4	MMP14	MatrixDB	20798051;20798051;20798051;20798051;20798051;20798051
FGG	ITGA5	MatrixDB	24789099
FGG	ITGB3	MatrixDB	24789099;25398877
FGG	NEK4	MatrixDB	25798074
FGG	SOST	MatrixDB	22206666
FLT1	HCK	MatrixDB	23397142;23397142
FLT1	HSPG2	MatrixDB	21596751
FLT1	LDLR	MatrixDB	17962812;17962812
FLT1	NRP1	MatrixDB	23452854
FLT1	PGF	MatrixDB	14684734
FLT1	S100A9	MatrixDB	23063127
FLT1	SRPK1	MatrixDB	23602568
FLT1	VEGFA	BioPlex 2.0;MatrixDB	26186194;28514442
FLT1	YES1	MatrixDB	12509223
FN1	FN1	MatrixDB;SRB lab manual curation	19285555;19931242;18042364;17914904;17914904;17914904;19826086;20541508;20541508;23530037
FN1	HGF	MatrixDB	8780385;25241761
FN1	HMGB1	MatrixDB	19738201
FN1	HRG	MatrixDB	21988832
FN1	HSPA1A	MatrixDB	19738201
FN1	HSPG2	MatrixDB;SRB lab manual curation	19738201;23530037
FN1	ITGA5	MatrixDB	16457822;19738201;19738201;19738201;19738201
FN1	ITGA5,ITGB1 CPX	MatrixDB	19502598
FN1	ITGAV	MatrixDB	19738201
FN1	ITGAV,ITGB3 CPX	MatrixDB	19502598
FN1	ITGB1	MatrixDB	21985969;19738201;19738201;19738201;19738201;19738201
FN1	LGALS8	BioPlex 2.0	26186194;28514442
FN1	LGALS9	BioPlex 2.0	26186194;28514442
FN1	LOX PFRAG (PRO_0000018520)*	MatrixDB;SRB lab manual curation	30082873;30082873;21690299;30082873
FN1	LPA	MatrixDB	2531657;9269765
FN1	MAG	MatrixDB	11423128
FN1	MAPRE1	MatrixDB	19738201
FN1	MAPT	MatrixDB	26402096;26402096
FN1	MMP2	BioPlex 2.0;MatrixDB	26186194;28514442
FN1	MMP2 PFRAG (PRO_0000391626)*	MatrixDB	9054449;9054449
FN1	MMP9	BioPlex 2.0	26186194;28514442
FN1	NCL	MatrixDB	19738201
FN1	NPM1	MatrixDB	19738201
FN1	PCOLCE	MatrixDB	25286301;25286301
FN1	PDAP1	MatrixDB	19738201
FN1	PDCD5	MatrixDB	19738201
FN1	PDGFA	MatrixDB	19966216
FN1	PDIA6	MatrixDB	19738201
FN1	PGK1	MatrixDB	19738201
FN1	POSTN	SRB lab manual curation	19887451
FN1	PPID	MatrixDB	19738201
FN1	RPL29	MatrixDB	19738201
FN1	RPS6KA5	MatrixDB	21988832
FN1	SLC3A2	MatrixDB	19738201
FN1	TF	MatrixDB	15174051
FN1	TFAM	MatrixDB	19738201
FN1	TFRC	MatrixDB	19738201
FN1	TGM2	MatrixDB	22442151;22442151;20080707;19738201
FN1	THBS1	MatrixDB	18226512;19542224;18042364
FN1	THBS1,THBS1,THBS1 CPX	SRB lab manual curation	6489349
FN1	THBS4	SRB lab manual curation	10956668
FN1	THBS4,THBS4,THBS4,THBS4,THBS4 CPX	SRB lab manual curation	10956668
FN1	TNC	MatrixDB	20708078;20708078;21349332
FN1	TNFAIP6	MatrixDB;Dataset PMID:29362135	18042364;18042364;18042364;18042364;18042364;18042364;18042364;18042364;18042364
FN1	TNFRSF11B,TNFRSF11B CPX	SRB lab manual curation	15799029
FN1	YES1	MatrixDB	19738201
FST	FSTL1	MatrixDB	20860622
FST	INHBA	MatrixDB	16482217;16482217
FST	MSTN	MatrixDB	19644449
FST	NPM1	MatrixDB	30021884
FST	SOST	MatrixDB	22206666
FSTL1	INHBA	MatrixDB	20860622;20860622
FSTL1	PRELP	BioPlex 2.0	26186194;28514442
FSTL1	TGFB1	MatrixDB	20860622;20860622
FSTL1	XCL1	BioPlex 2.0	26186194;28514442
FURIN	MMP14	MatrixDB	20608975
FURIN	MSTN	MatrixDB	23829672;25543063
FURIN	SERPINA5	BioPlex 2.0	26186194;28514442
GHR	GHR	MatrixDB	16116438;16116438;16116438;16116438
GHR	PTPRC	MatrixDB	19167335
GREM1	KDR	MatrixDB	20660291;20660291;20660291
GREM1	SOST	MatrixDB	22206666
GREM2	GREM2	MatrixDB	23850456;23850456;23850456
GRN	HSPG2	MatrixDB	19422911;12900424;12900424;12900424
GRN	RPS6KA1	MatrixDB	23455922
GRN	SERPING1	BioPlex 2.0	26186194;28514442
GRN	SORT1	MatrixDB	24070898;23236149;23236149
GRN	SOST	MatrixDB	22206666
GRN	TGM2	MatrixDB	21988832
GRN	TNFRSF1B	MatrixDB	24070898;24070898;24070898;24070898;24070898
GSK3B	HSPA1A	MatrixDB	21985244
GSK3B	MAPT	MatrixDB	17078951;17078951;17512525;21985244;21985244;21985244;21985244;24165324;24165324;21985244;24165324;24165324
GSK3B	PTN	MatrixDB	21900206
GSK3B	SNCA	MatrixDB	21985244;21985244
GSN	MAPT	MatrixDB	26402096
HABP4	NPM1	MatrixDB	19523114
HAPLN1	MAPT	MatrixDB	26402096
HAPLN1	SOST	MatrixDB	22206666
HAPLN2	HAPLN2	MatrixDB	18296487
HAPLN2	IGFBP7	MatrixDB	18296487;18296487
HCK	KIT	MatrixDB	24728074;24728074
HCK	MET	MatrixDB	24728074
HDGF	LMNA	MatrixDB	29568061;29568061
HDGF	NCL	MatrixDB	21907836
HDGF	POLRMT	MatrixDB	21907836
HDGF	PSIP1	MatrixDB	21907836;21907836
HDGF	SRPK1	MatrixDB	21907836
HFE	TF	MatrixDB	20618438;20618438;20618438;20618438;20618438
HFE	TFRC	MatrixDB	20618438;15965644;15965644;14691533;20133674;20133674
HGF	HGF	MatrixDB	22897854;22897854;22897854;17804794;20624990
HGF	HSPG2	MatrixDB	8780385
HGF	LAMA1,LAMB1,LAMC1 CPX	MatrixDB	8780385
HGF	MET	MatrixDB	15167892;17981115;1846706;1846706;22897854;16537482;17804794;20624990;20624990;22897854
HGF	TF	MatrixDB	8780385
HGF	THBS1,THBS1,THBS1 CPX	MatrixDB	8780385
HGF	TNC	MatrixDB;SRB lab manual curation	8780385;23637968
HGF	VTN	MatrixDB	8780385
HGF	VWF	MatrixDB	8780385
HIST1H1A	LAMA2	MatrixDB	30021884
HIST1H1A	MDK	BioPlex 2.0	26186194;28514442
HMGB1	SOD1	MatrixDB	29128334;29128334
HMGB1	TXN	MatrixDB	18996119
Heparin	MAPT	MatrixDB	26402096;26402096
Heparin	SORT1	MatrixDB	26496610
Heparin	TGM2	MatrixDB	21988832
Heparin/Heparan sulfate	LAMA1,LAMB1,LAMC1 CPX	MatrixDB;Dataset PMID:24246365	19542224;9949192
Heparin/Heparan sulfate	COL3A1,COL3A1,COL3A1 CPX	MatrixDB	2524477
Heparin/Heparan sulfate	HPSE,HPSE CPX	MatrixDB	26575439
Heparin/Heparan sulfate	COL12A1,COL12A1,COL12A1 CPX	MatrixDB	7642694
Heparin/Heparan sulfate	TNFRSF11B,TNFRSF11B CPX	SRB lab manual curation	15799029
Heparin/Heparan sulfate	COL13A1,COL13A1,COL13A1 CPX	MatrixDB	11956183
Heparin/Heparan sulfate	COL14A1,COL14A1,COL14A1 CPX	MatrixDB	11098058
Heparin/Heparan sulfate	ITGA5,ITGB1 CPX	MatrixDB	19502598;19542224
Heparin/Heparan sulfate	ITGAV,ITGB3 CPX	MatrixDB	19502598
Heparin/Heparan sulfate	ITGAV,ITGB5 CPX	MatrixDB	19502598
Heparin/Heparan sulfate	LAMA1,LAMB1,LAMC1,NID1 CPX	Dataset PMID:24246365	2303489
Heparin/Heparan sulfate	FGA,FGA,FGB,FGB,FGG,FGG CPX	Dataset PMID:24246365	12820880
Heparin/Heparan sulfate	ITGA2B,ITGB3 CPX	Dataset PMID:24246365;SRB lab manual curation	22197178;11241131
Heparin/Heparan sulfate	ITGA4,ITGB1 CPX	Dataset PMID:24246365	19888514
Heparin/Heparan sulfate	COL1A1,COL1A1,COL1A2 CPX	MatrixDB	2524477;19542224
Heparin/Heparan sulfate	COL4A1,COL4A1,COL4A2 CPX	MatrixDB	19542224
Heparin/Heparan sulfate	COL5A1,COL5A1,COL5A2 CPX	MatrixDB	2524477;9614116
Heparin/Heparan sulfate	COL5A1,COL5A2,COL5A3 CPX	MatrixDB	9614116
Heparin/Heparan sulfate	COL5A1,COL5A1,COL5A1 CPX	MatrixDB	9614116;16815843
Heparin/Heparan sulfate	COL23A1,COL23A1,COL23A1 CPX	MatrixDB	12644459
Heparin/Heparan sulfate	THBS1,THBS1,THBS1 CPX	Dataset PMID:24246365	2659597;2961064;9949192
Heparin/Heparan sulfate	COL9A1,COL9A2,COL9A3 CPX	Dataset PMID:24246365	15047691
Heparin/Heparan sulfate	THBS4,THBS4,THBS4,THBS4,THBS4 CPX	SRB lab manual curation	10956668
Heparin/Heparan sulfate	COMP,COMP,COMP,COMP,COMP CPX	Dataset PMID:24246365	17588949
Heparin/Heparan sulfate	COL2A1,COL11A1,COL11A2 CPX	MatrixDB	19542224
Heparin/Heparan sulfate	COL6A1,COL6A2,COL6A3 CPX	MatrixDB	2524477;19542224
Heparin/Heparan sulfate	VEGFA,VEGFA CPX	GO	21658003
Heparin/Heparan sulfate	C1QA,C1QA,C1QA,C1QA,C1QA,C1QA,C1QB,C1QB,C1QB,C1QB,C1QB,C1QB,C1QC,C1QC,C1QC,C1QC,C1QC,C1QC CPX	Dataset PMID:24246365	20548024
Heparin/Heparan sulfate	C1QA,C1QB,C1QC,C1R,C1S CPX	Dataset PMID:24246365	16125850;19389385
Heparin/Heparan sulfate	C4A,C4A,C4A CPX	Dataset PMID:24246365	16125850;19389385
Heparin/Heparan sulfate	C8A,C8B,C8G CPX	Dataset PMID:24246365	16125850;19389385
Heparin/Heparan sulfate	F8,VWF CPX	Dataset PMID:24246365	11278379
Heparin/Heparan sulfate	CCL24	Dataset PMID:21454685	12731055
Heparin/Heparan sulfate	LGALS9	MatrixDB	21454685
Heparin/Heparan sulfate	AGRP	Dataset PMID:21454685	11461706
Heparin/Heparan sulfate	TNFRSF11B	Dataset PMID:24246365	16828054
Heparin/Heparan sulfate	POLRMT	SRB lab manual curation	27903899
Heparin/Heparan sulfate	MANBA	SRB lab manual curation	DOI: 10.1016/j.smallrumres.2013.01.005
Heparin/Heparan sulfate	AGRN	GO;UniProtKB	8607994
Heparin/Heparan sulfate	CCL21	Dataset PMID:21454685	11286540
Heparin/Heparan sulfate	CYR61	Dataset PMID:21454685;GO;UniProtKB	1782153
Heparin/Heparan sulfate	CCL22	Dataset PMID:21454685	9151897
Heparin/Heparan sulfate	NCAN	MatrixDB	19576282
Heparin/Heparan sulfate	CXCL11	MatrixDB;Dataset PMID:21454685;GO	27044744;18645041;18411283
Heparin/Heparan sulfate	ENPP3	MatrixDB	21454685
Heparin/Heparan sulfate	PDCD5	Dataset PMID:24246365;Dataset PMID:21454685	17165023;17257606
Heparin/Heparan sulfate	NRP1	Dataset PMID:21454685;GO;UniProtKB	17405859;17989695
Heparin/Heparan sulfate	HS3ST1	SRB lab manual curation	22431632
Heparin/Heparan sulfate	MSTN	GO;UniProtKB	GO_REF:0000107
Heparin/Heparan sulfate	NCR3	Dataset PMID:24246365	18006589;19196184
Heparin/Heparan sulfate	ADAMTS3	GO;UniProtKB	GO_REF:0000037
Heparin/Heparan sulfate	GPR182	MatrixDB	21454685
Heparin/Heparan sulfate	LAMA5	MatrixDB;Dataset PMID:24246365	11304538;10799535;11098055
Heparin/Heparan sulfate	SLC22A1	MatrixDB	21454685
Heparin/Heparan sulfate	CCL25	Dataset PMID:21454685	18030990
Heparin/Heparan sulfate	FGF10	Dataset PMID:21454685;GO;SRB lab manual curation	9582367;11923311;27030175
Heparin/Heparan sulfate	FGF16	Dataset PMID:21454685	18835578
Heparin/Heparan sulfate	DHH	Dataset PMID:24246365	17348690
Heparin/Heparan sulfate	ZNF207	GO	GO_REF:0000107
Heparin/Heparan sulfate	SYNGR1	MatrixDB	21454685
Heparin/Heparan sulfate	CXCL13	Dataset PMID:21454685;GO	18030990;11708770
Heparin/Heparan sulfate	FGF17	Dataset PMID:21454685;SRB lab manual curation	18835578;27030175
Heparin/Heparan sulfate	NRP2	GO;UniProtKB	GO_REF:0000037
Heparin/Heparan sulfate	GREM1	Dataset PMID:24246365	21921258
Heparin/Heparan sulfate	SLIT1	Dataset PMID:21454685	17062560
Heparin/Heparan sulfate	PSIP1	Dataset PMID:24246365	22223757
Heparin/Heparan sulfate	GPX5	SRB lab manual curation	DOI: 10.1016/j.smallrumres.2013.01.005
Heparin/Heparan sulfate	ATRN	MatrixDB	21454685
Heparin/Heparan sulfate	TNFSF13	Dataset PMID:21454685	15846369
Heparin/Heparan sulfate	CPD	MatrixDB	21454685
Heparin/Heparan sulfate	NCR1	Dataset PMID:24246365	16262248;18006589;19196184
Heparin/Heparan sulfate	WISP2	GO	PAINT_REF:11348
Heparin/Heparan sulfate	FGF18	MatrixDB;Dataset PMID:21454685	21454685;18835578
Heparin/Heparan sulfate	ECM2	GO	PAINT_REF:24373
Heparin/Heparan sulfate	SLIT2	Dataset PMID:21454685;GO;UniProtKB;Dataset PMID:24246365	17317573;17062560;19498462;15063764
Heparin/Heparan sulfate	GLCE	SRB lab manual curation	25568314
Heparin/Heparan sulfate	ABCC6	MatrixDB	21454685
Heparin/Heparan sulfate	ABCB11	MatrixDB	21454685
Heparin/Heparan sulfate	WISP1	GO	PAINT_REF:11348
Heparin/Heparan sulfate	WISP3	GO	PAINT_REF:11348
Heparin/Heparan sulfate	ADGRL2	MatrixDB	21454685
Heparin/Heparan sulfate	NTN1	Dataset PMID:24246365;Dataset PMID:21454685	10799289
Heparin/Heparan sulfate	FGF19	UniProtKB	22396159
Heparin/Heparan sulfate	MPIG6B	Dataset PMID:21454685;GO;UniProtKB	15848171
Heparin/Heparan sulfate	NCR2	Dataset PMID:24246365	17536787;19196184
Heparin/Heparan sulfate	SOD1	MatrixDB;Dataset PMID:24246365	3223905;11863456
Heparin/Heparan sulfate	CP	MatrixDB	21454685
Heparin/Heparan sulfate	F8	Dataset PMID:24246365	11278379
Heparin/Heparan sulfate	PGK1	SRB lab manual curation	DOI: 10.1016/j.smallrumres.2013.01.005
Heparin/Heparan sulfate	F2	MatrixDB;Dataset PMID:24246365;Dataset PMID:21454685;GO;SRB lab manual curation	2007587;9949192;11412111;20421939;15548541;15311268;15311269;16973611;21454685
Heparin/Heparan sulfate	HP	MatrixDB	21454685
Heparin/Heparan sulfate	HPR	MatrixDB	21454685
Heparin/Heparan sulfate	F9	Dataset PMID:24246365;Dataset PMID:21454685	11412111;15736971
Heparin/Heparan sulfate	F10	Dataset PMID:24246365;Dataset PMID:21454685	11412111;10652320
Heparin/Heparan sulfate	CFD	Dataset PMID:21454685	8487783
Heparin/Heparan sulfate	PLG	MatrixDB	21454685
Heparin/Heparan sulfate	F12	Dataset PMID:24246365;Dataset PMID:21454685	11412111;19389385
Heparin/Heparan sulfate	PLAU	Dataset PMID:24246365;Dataset PMID:21454685	9949192;1510944
Heparin/Heparan sulfate	PLAT	Dataset PMID:21454685	1830477
Heparin/Heparan sulfate	CFB	Dataset PMID:24246365;Dataset PMID:21454685	16125850
Heparin/Heparan sulfate	SERPINC1	MatrixDB;Dataset PMID:24246365;Dataset PMID:21454685;GO;UniProtKB;SRB lab manual curation	7287752;11135627;1901416;8343518;9763552;9949192;15371417;16004430;19034645;19389385;15311269;7287751;9405673;12873131;15311268;16973611
Heparin/Heparan sulfate	SERPINA1	MatrixDB	21454685
Heparin/Heparan sulfate	AGT	MatrixDB	21454685
Heparin/Heparan sulfate	A2M	MatrixDB;SRB lab manual curation	21454685;DOI: 10.1016/j.smallrumres.2013.01.005
Heparin/Heparan sulfate	C3	Dataset PMID:24246365;Dataset PMID:21454685	16125850;19389385
Heparin/Heparan sulfate	C5	Dataset PMID:24246365;Dataset PMID:21454685	16125850;19389385
Heparin/Heparan sulfate	KNG1	Dataset PMID:24246365;Dataset PMID:21454685;GO	10819977;19389385;12911595
Heparin/Heparan sulfate	PDGFB	Dataset PMID:21454685	9677323
Heparin/Heparan sulfate	LDLR	MatrixDB	21454685
Heparin/Heparan sulfate	TGFB1	Dataset PMID:21454685	9218427
Heparin/Heparan sulfate	NGF	Dataset PMID:24246365	1901416
Heparin/Heparan sulfate	PRL	Dataset PMID:21454685	9927340
Heparin/Heparan sulfate	TG	Dataset PMID:24246365;Dataset PMID:21454685	11916630
Heparin/Heparan sulfate	TNF	Dataset PMID:21454685	18424242
Heparin/Heparan sulfate	IFNG	MatrixDB;Dataset PMID:24246365;Dataset PMID:21454685	7654188;1901275
Heparin/Heparan sulfate	PIGR	MatrixDB	21454685
Heparin/Heparan sulfate	COL1A1	Dataset PMID:21454685	9636139
Heparin/Heparan sulfate	COL2A1	MatrixDB;Dataset PMID:21454685	3691037;3011107
Heparin/Heparan sulfate	COL3A1	Dataset PMID:21454685	3691037
Heparin/Heparan sulfate	COL4A1	Dataset PMID:21454685	2914908
Heparin/Heparan sulfate	APOE	MatrixDB;Dataset PMID:24246365;Dataset PMID:21454685;GO;UniProtKB	10526164;2745454;7683668;8300609;15583000;2418019;21454685
Heparin/Heparan sulfate	FGA	MatrixDB	21454685
Heparin/Heparan sulfate	FGB	MatrixDB;Dataset PMID:21454685	21454685;12820880
Heparin/Heparan sulfate	FGG	MatrixDB	21454685
Heparin/Heparan sulfate	SLC4A1	MatrixDB	21454685
Heparin/Heparan sulfate	APCS	Dataset PMID:24246365;Dataset PMID:21454685	12071948;2948956
Heparin/Heparan sulfate	C1QA	Dataset PMID:21454685;SRB lab manual curation	16125850;20548024
Heparin/Heparan sulfate	C1QB	Dataset PMID:21454685;SRB lab manual curation	16125850;20548024
Heparin/Heparan sulfate	C1QC	MatrixDB;Dataset PMID:21454685;SRB lab manual curation	21454685;16125850;20548024
Heparin/Heparan sulfate	C9	Dataset PMID:24246365;Dataset PMID:21454685	16125850;19389385
Heparin/Heparan sulfate	APOH	Dataset PMID:24246365;Dataset PMID:21454685;GO;UniProtKB	10229659;11711550
Heparin/Heparan sulfate	FN1	MatrixDB;Dataset PMID:24246365;Dataset PMID:21454685;GO;UniProtKB	2524477;19542224;22442151;24148804;10075919;1400330;11956183;18243143;25034023;1901416;3567152;9949192;2524477;8760376;11246004;12377765;21454685
Heparin/Heparan sulfate	AMBP	MatrixDB	21454685
Heparin/Heparan sulfate	TTR	Dataset PMID:24246365	21422279
Heparin/Heparan sulfate	ALB	Dataset PMID:24246365	1901416
Heparin/Heparan sulfate	GC	MatrixDB	21454685
Heparin/Heparan sulfate	PPBP	Dataset PMID:24246365;Dataset PMID:21454685	7922353
Heparin/Heparan sulfate	PF4	MatrixDB;Dataset PMID:24246365;Dataset PMID:21454685;GO;UniProtKB	9252363;2409923;7922353;8526843;8613703;9395524;10212210;17915935;19034645;19389385;9531587;19567366
Heparin/Heparan sulfate	CXCL10	Dataset PMID:21454685;GO	12571234;18645041
Heparin/Heparan sulfate	TFRC	MatrixDB	21454685
Heparin/Heparan sulfate	TF	MatrixDB	21454685
Heparin/Heparan sulfate	LTF	Dataset PMID:21454685;GO;UniProtKB;SRB lab manual curation	12646274;11907569;DOI: 10.1016/j.smallrumres.2013.01.005
Heparin/Heparan sulfate	ANG	Dataset PMID:21454685;GO	9092516;10103013
Heparin/Heparan sulfate	F11	Dataset PMID:24246365;Dataset PMID:21454685;GO;UniProtKB	11412111;9632702
Heparin/Heparan sulfate	KLKB1	Dataset PMID:24246365	19389385
Heparin/Heparan sulfate	SLPI	MatrixDB;Dataset PMID:24246365;Dataset PMID:21454685	1525165;9593692
Heparin/Heparan sulfate	C4BPA	Dataset PMID:21454685	2136880
Heparin/Heparan sulfate	VTN	Dataset PMID:24246365;Dataset PMID:21454685;GO;UniProtKB	9054371;11437360;20600001;9572850
Heparin/Heparan sulfate	PROC	Dataset PMID:24246365;Dataset PMID:21454685	11412111;10456457
Heparin/Heparan sulfate	ANXA1	MatrixDB	21454685
Heparin/Heparan sulfate	PDGFA	MatrixDB;Dataset PMID:21454685	9038157;8810913
Heparin/Heparan sulfate	APOB	MatrixDB;Dataset PMID:21454685;GO;UniProtKB	3301850;10608816;16233946;9637699;21454685
Heparin/Heparan sulfate	CSF2	MatrixDB;Dataset PMID:21454685	16027123
Heparin/Heparan sulfate	PRNP	Dataset PMID:21454685;UniProtKB	11882649
Heparin/Heparan sulfate	HRG	Dataset PMID:24246365;Dataset PMID:21454685;GO;UniProtKB	3584128;6833231;16436387;21304106;19712047;15138272;6415849
Heparin/Heparan sulfate	A1BG	MatrixDB	21454685
Heparin/Heparan sulfate	VWF	Dataset PMID:24246365;Dataset PMID:21454685	11278379;1577724
Heparin/Heparan sulfate	ERBB2	MatrixDB	21454685
Heparin/Heparan sulfate	WNT1	Dataset PMID:21454685	8909553
Heparin/Heparan sulfate	ATP1A1	MatrixDB	21454685
Heparin/Heparan sulfate	ATP1B1	MatrixDB	21454685
Heparin/Heparan sulfate	APP	MatrixDB;Dataset PMID:24246365;Dataset PMID:21454685;GO;UniProtKB	7929392;7982489;20212142;9048763
Heparin/Heparan sulfate	ARG1	MatrixDB	21454685
Heparin/Heparan sulfate	ITGB3	Dataset PMID:21454685	19502598
Heparin/Heparan sulfate	IL4	Dataset PMID:21454685	9071560
Heparin/Heparan sulfate	IL5	MatrixDB;Dataset PMID:21454685	9500522
Heparin/Heparan sulfate	SERPINE1	MatrixDB;Dataset PMID:21454685	1703436;1375944
Heparin/Heparan sulfate	SERPINA5	Dataset PMID:21454685;GO;UniProtKB;SRB lab manual curation	1315738;11120760;18974053;18362344
Heparin/Heparan sulfate	SERPING1	MatrixDB;Dataset PMID:24246365;Dataset PMID:21454685	9882449;16125850;20351192
Heparin/Heparan sulfate	CFI	Dataset PMID:24246365;Dataset PMID:21454685	16125850
Heparin/Heparan sulfate	MPO	GO	11907569
Heparin/Heparan sulfate	FGF1	MatrixDB;Dataset PMID:24246365;Dataset PMID:21454685;GO;UniProtKB;SRB lab manual curation	9343372;18441324;7509590;7528103;7684608;11488623;19034645;20145243;1885605;9655399;11069186;22057274;23240683
Heparin/Heparan sulfate	IL6	MatrixDB;Dataset PMID:21454685	11067924
Heparin/Heparan sulfate	CLEC3B	GO	10727405
Heparin/Heparan sulfate	SERPIND1	MatrixDB;Dataset PMID:24246365;Dataset PMID:21454685;GO;UniProtKB	12706831;15371417;19389385;1902471
Heparin/Heparan sulfate	ITGB1	Dataset PMID:21454685	19502598
Heparin/Heparan sulfate	COL5A2	UniProtKB	8982859
Heparin/Heparan sulfate	INSR	MatrixDB	21454685
Heparin/Heparan sulfate	GSN	MatrixDB	21454685
Heparin/Heparan sulfate	C2	Dataset PMID:24246365;Dataset PMID:21454685	16125850;19389385
Heparin/Heparan sulfate	S100A9	Dataset PMID:24246365	11723110
Heparin/Heparan sulfate	ENO1	MatrixDB	21454685
Heparin/Heparan sulfate	ITGAV	Dataset PMID:21454685	19502598
Heparin/Heparan sulfate	LPL	Dataset PMID:24246365;Dataset PMID:21454685;GO;UniProtKB	6882775;7717977;12573449;2110364;20124439;7868983;10085125
Heparin/Heparan sulfate	SERPINE2	Dataset PMID:21454685;GO;UniProtKB;SRB lab manual curation	1752960;1939253;3997857;9949192
Heparin/Heparan sulfate	P4HB	MatrixDB	21454685
Heparin/Heparan sulfate	CTSD	SRB lab manual curation	19919557
Heparin/Heparan sulfate	ANXA2	Dataset PMID:24246365;Dataset PMID:21454685;SRB lab manual curation	9182528;16882661
Heparin/Heparan sulfate	C8A	Dataset PMID:21454685	16125850
Heparin/Heparan sulfate	C8B	MatrixDB;Dataset PMID:21454685	21454685;16125850
Heparin/Heparan sulfate	C8G	Dataset PMID:21454685	16125850
Heparin/Heparan sulfate	PRSS1	Dataset PMID:21454685	9367173
Heparin/Heparan sulfate	CTSB	MatrixDB;Dataset PMID:21454685	11016923
Heparin/Heparan sulfate	THBS1	MatrixDB;Dataset PMID:21454685;GO;UniProtKB	18226512;19542224;101549;8288588;16407063;18065761;10734084Ê
Heparin/Heparan sulfate	GJB1	MatrixDB	21454685
Heparin/Heparan sulfate	COL1A2	Dataset PMID:21454685	9636139
Heparin/Heparan sulfate	ANXA6	MatrixDB;Dataset PMID:21454685	21454685;9545337
Heparin/Heparan sulfate	ABCB1	MatrixDB	21454685
Heparin/Heparan sulfate	SERPINA6	MatrixDB	21454685
Heparin/Heparan sulfate	SLC3A2	MatrixDB	21454685
Heparin/Heparan sulfate	ELANE	MatrixDB;Dataset PMID:24246365;Dataset PMID:21454685;GO	1869557;7961933;11907569;19251947;16866356
Heparin/Heparan sulfate	MMP2	MatrixDB;Dataset PMID:24246365;Dataset PMID:21454685	8269931;9054449;15030172;17623663
Heparin/Heparan sulfate	SOD3	MatrixDB;Dataset PMID:21454685;GO;UniProtKB	11863456;19289127
Heparin/Heparan sulfate	CTSG	MatrixDB;Dataset PMID:24246365;Dataset PMID:21454685;GO	1869557;7961933;11907569;16310171
Heparin/Heparan sulfate	INHBA	Dataset PMID:21454685	3864157
Heparin/Heparan sulfate	ITGA2B	Dataset PMID:24246365	22197178
Heparin/Heparan sulfate	LPA	GO	2531657
Heparin/Heparan sulfate	COL4A2	Dataset PMID:21454685	2914908
Heparin/Heparan sulfate	PTPRC	MatrixDB;GO	21454685
Heparin/Heparan sulfate	MET	MatrixDB	11435444;22897854
Heparin/Heparan sulfate	CFH	MatrixDB;Dataset PMID:24246365;Dataset PMID:21454685;GO;UniProtKB	15183770;16125850;22471560;24744754Ê
Heparin/Heparan sulfate	FGF4	Dataset PMID:21454685;SRB lab manual curation;GO;UniProtKB	11486033;27030175
Heparin/Heparan sulfate	ITGA5	Dataset PMID:21454685	19502598
Heparin/Heparan sulfate	IL3	Dataset PMID:21454685	10607697
Heparin/Heparan sulfate	ANXA5	Dataset PMID:24246365;Dataset PMID:21454685;SRB lab manual curation	11342135
Heparin/Heparan sulfate	RPSA	MatrixDB	21454685
Heparin/Heparan sulfate	FGF2	MatrixDB;Dataset PMID:24246365;Dataset PMID:21454685;GO;UniProtKB;SRB lab manual curation	1587820;11135627;1901416;8142385;9199199;9949192;11488623;12000311;12690039;14707131;15096041;19034645;1885605;11030354;8599088
Heparin/Heparan sulfate	MMP7	Dataset PMID:24246365;Dataset PMID:21454685;GO	10660581;19654318
Heparin/Heparan sulfate	CXCL1	Dataset PMID:24246365;Dataset PMID:21454685	7922353
Heparin/Heparan sulfate	HMGB1	Dataset PMID:24246365;Dataset PMID:21454685	21095260;1885601
Heparin/Heparan sulfate	FBP1	SRB lab manual curation	DOI: 10.1016/j.smallrumres.2013.01.005
Heparin/Heparan sulfate	SPARC	MatrixDB	19542224
Heparin/Heparan sulfate	C1S	Dataset PMID:24246365	20351192
Heparin/Heparan sulfate	FURIN	MatrixDB	21454685
Heparin/Heparan sulfate	C4A	MatrixDB;Dataset PMID:21454685	21454685;16125850
Heparin/Heparan sulfate	SAA1	GO;UniProtKB	GO_REF:0000037
Heparin/Heparan sulfate	HSPA1A	SRB lab manual curation	DOI: 10.1016/j.smallrumres.2013.01.005
Heparin/Heparan sulfate	CXCL8	MatrixDB;Dataset PMID:24246365;Dataset PMID:21454685	9624135;15183770;24501198;10504268;10961890;11814358;14997572;19034645;7922353Ê
Heparin/Heparan sulfate	CCL3	Dataset PMID:21454685;SRB lab manual curation	9092555;27091995
Heparin/Heparan sulfate	ACR	SRB lab manual curation	DOI: 10.1016/j.smallrumres.2013.01.005
Heparin/Heparan sulfate	PTPRF	GO;UniProtKB	GO_REF:0000037
Heparin/Heparan sulfate	TXN	MatrixDB	21454685
Heparin/Heparan sulfate	MAPT	Dataset PMID:21454685	17029411
Heparin/Heparan sulfate	C7	Dataset PMID:24246365;Dataset PMID:21454685	16125850;19389385
Heparin/Heparan sulfate	TFPI	Dataset PMID:24246365;Dataset PMID:21454685	11488623;11772005
Heparin/Heparan sulfate	PF4V1	GO;UniProtKB	23536183
Heparin/Heparan sulfate	FGF6	Dataset PMID:21454685;UniProtKB	1814436;27030175
Heparin/Heparan sulfate	CLU	MatrixDB;SRB lab manual curation	21454685;DOI: 10.1016/j.smallrumres.2013.01.005
Heparin/Heparan sulfate	GHR	MatrixDB	21454685
Heparin/Heparan sulfate	IAPP	Dataset PMID:21454685	16866369
Heparin/Heparan sulfate	LIPC	MatrixDB;Dataset PMID:21454685;GO;UniProtKB	21454685;2418019
Heparin/Heparan sulfate	SLC2A2	MatrixDB	21454685
Heparin/Heparan sulfate	ITGAM	Dataset PMID:21454685	7559767
Heparin/Heparan sulfate	MBL2	MatrixDB	21454685
Heparin/Heparan sulfate	FGFR1	Dataset PMID:24246365;Dataset PMID:21454685;GO;UniProtKB;SRB lab manual curation	8824259;12034712;15096041;18480409;9655399;8456318;11030354
Heparin/Heparan sulfate	FGF3	Dataset PMID:21454685;UniProtKB;SRB lab manual curation	1944270;27030175
Heparin/Heparan sulfate	FGF5	Dataset PMID:21454685;UniProtKB	8386828;2005884
Heparin/Heparan sulfate	COL11A1	Dataset PMID:24246365;Dataset PMID:21454685	15930001;11084037
Heparin/Heparan sulfate	COL6A3	MatrixDB	1425570
Heparin/Heparan sulfate	ANXA3	MatrixDB	21454685
Heparin/Heparan sulfate	BMP2	MatrixDB;Dataset PMID:24246365;Dataset PMID:21454685	8620887
Heparin/Heparan sulfate	BMP4	MatrixDB;Dataset PMID:21454685;GO	15381701;11839272
Heparin/Heparan sulfate	BMP3	Dataset PMID:21454685	3478684
Heparin/Heparan sulfate	RNASE3	Dataset PMID:24246365	18593710;20213669
Heparin/Heparan sulfate	IL7	Dataset PMID:24246365;Dataset PMID:21454685	22085638;8589262
Heparin/Heparan sulfate	CCL4	Dataset PMID:21454685	10438952
Heparin/Heparan sulfate	CCL2	MatrixDB;Dataset PMID:24246365;Dataset PMID:21454685;GO	27044744;19642141;21087715;18662971;24727473;20097750;15033992
Heparin/Heparan sulfate	CCL5	Dataset PMID:24246365;Dataset PMID:21454685;SRB lab manual curation	12475226;11116158;15530372;27091995
Heparin/Heparan sulfate	NCAM1	Dataset PMID:21454685;SRB lab manual curation	2809592;9949192
Heparin/Heparan sulfate	ATP1A3	UniProtKB
Heparin/Heparan sulfate	C6	Dataset PMID:24246365;Dataset PMID:21454685	16125850;19389385
Heparin/Heparan sulfate	PRG2	Dataset PMID:21454685;GO;UniProtKB;SRB lab manual curation	16245931
Heparin/Heparan sulfate	COL11A2	MatrixDB;Dataset PMID:21454685	3691037;11084037
Heparin/Heparan sulfate	SELL	MatrixDB;Dataset PMID:21454685;Dataset PMID:24246365;GO	7687382;17629851;7680663;9466983
Heparin/Heparan sulfate	MIF	MatrixDB	21454685
Heparin/Heparan sulfate	HGF	MatrixDB;Dataset PMID:24246365;Dataset PMID:21454685;SRB lab manual curation	8157651;9443912;14707131;17258232;11597998
Heparin/Heparan sulfate	PLA2G2A	Dataset PMID:21454685	8939951
Heparin/Heparan sulfate	MMP9	Dataset PMID:21454685	18216069
Heparin/Heparan sulfate	AKR1B1	MatrixDB	21454685
Heparin/Heparan sulfate	ELN	MatrixDB	15748998
Heparin/Heparan sulfate	VEGFA	MatrixDB;Dataset PMID:24246365;Dataset PMID:21454685;GO;UniProtKB	16258170;14707131;16014624;19034645;21658003;17626017;14570917;15001987
Heparin/Heparan sulfate	CD1D	MatrixDB	21454685
Heparin/Heparan sulfate	ST6GAL1	MatrixDB	21454685
Heparin/Heparan sulfate	SELP	MatrixDB;Dataset PMID:24246365;Dataset PMID:21454685;GO	9466983;17629851;7680663
Heparin/Heparan sulfate	PECAM1	Dataset PMID:21454685	18327914
Heparin/Heparan sulfate	CD36	MatrixDB	21454685
Heparin/Heparan sulfate	BPI	Dataset PMID:24246365	8294435
Heparin/Heparan sulfate	IGFBP3	Dataset PMID:24246365;Dataset PMID:21454685	15691886
Heparin/Heparan sulfate	FLT1	Dataset PMID:21454685	9633524
Heparin/Heparan sulfate	IGFBP2	Dataset PMID:21454685	17020769
Heparin/Heparan sulfate	BMP7	MatrixDB;Dataset PMID:21454685;GO	12927798
Heparin/Heparan sulfate	LBP	Dataset PMID:24246365	15699163
Heparin/Heparan sulfate	NCL	MatrixDB	17615292;19877579
Heparin/Heparan sulfate	AOC1	Dataset PMID:21454685;GO;UniProtKB	10681052;12072962;19764817
Heparin/Heparan sulfate	CEL	GO	7578248
Heparin/Heparan sulfate	CXCL2	Dataset PMID:21454685	2643119
Heparin/Heparan sulfate	FST	Dataset PMID:24246365;Dataset PMID:21454685;UniProtKB;GO	17409095;12867435;1918055;1301390
Heparin/Heparan sulfate	ATP2B1	MatrixDB	21454685
Heparin/Heparan sulfate	AZU1	Dataset PMID:21454685;GO;UniProtKB	11994286;15879141
Heparin/Heparan sulfate	TPSB2	Dataset PMID:21454685	15567416
Heparin/Heparan sulfate	EFNA1	Dataset PMID:21454685	17317573
Heparin/Heparan sulfate	COL9A1	MatrixDB;Dataset PMID:24246365;Dataset PMID:21454685	15047691
Heparin/Heparan sulfate	COL5A1	MatrixDB;Dataset PMID:24246365;Dataset PMID:21454685;GO;UniProtKB	9614116;16815843;2203476
Heparin/Heparan sulfate	MAG	SRB lab manual curation	2446864
Heparin/Heparan sulfate	PTN	Dataset PMID:24246365;Dataset PMID:21454685;GO;UniProtKB	10413105;16155004;17607711;10788472;1733956
Heparin/Heparan sulfate	ABCB4	MatrixDB	21454685
Heparin/Heparan sulfate	NT5E	MatrixDB	21454685
Heparin/Heparan sulfate	MDK	Dataset PMID:24246365;Dataset PMID:21454685;GO;UniProtKB	10978312;9384573
Heparin/Heparan sulfate	FGF7	Dataset PMID:21454685;GO;UniProtKB	9636026
Heparin/Heparan sulfate	FGFR2	MatrixDB;Dataset PMID:24246365;Dataset PMID:21454685;GO;UniProtKB;SRB lab manual curation	12034712;11069186
Heparin/Heparan sulfate	COMT	MatrixDB	21454685
Heparin/Heparan sulfate	TGM2	MatrixDB;Dataset PMID:24246365;Dataset PMID:21454685	15935280;19542224;22442151;19398782;22447354
Heparin/Heparan sulfate	BMP6	Dataset PMID:24246365;Dataset PMID:21454685	14707131
Heparin/Heparan sulfate	LPO	SRB lab manual curation	DOI: 10.1016/j.smallrumres.2013.01.005
Heparin/Heparan sulfate	TNXB	MatrixDB;GO	7512972;11278641
Heparin/Heparan sulfate	IL10	MatrixDB;Dataset PMID:24246365;Dataset PMID:21454685	10961890
Heparin/Heparan sulfate	CCL1	Dataset PMID:21454685	1557400
Heparin/Heparan sulfate	ENPP1	MatrixDB	21454685
Heparin/Heparan sulfate	FGFR4	MatrixDB;Dataset PMID:24246365;Dataset PMID:21454685;GO;UniProtKB	11278860;18480409
Heparin/Heparan sulfate	FGFR3	Dataset PMID:21454685;UniProtKB	14732692;11134040
Heparin/Heparan sulfate	IGFBP4	Dataset PMID:21454685	15735305
Heparin/Heparan sulfate	PPIB	Dataset PMID:21454685	15109301
Heparin/Heparan sulfate	ANOS1	MatrixDB;Dataset PMID:24246365;Dataset PMID:21454685;GO;UniProtKB	19696444;15324302
Heparin/Heparan sulfate	CMA1	Dataset PMID:21454685	8182050
Heparin/Heparan sulfate	LAMA2	MatrixDB;Dataset PMID:21454685	11304538;10022829
Heparin/Heparan sulfate	IGFBP6	Dataset PMID:21454685	9165012
Heparin/Heparan sulfate	IGFBP5	Dataset PMID:24246365;Dataset PMID:21454685	15691886;8626396
Heparin/Heparan sulfate	TNC	Dataset PMID:24246365;Dataset PMID:21454685	15069070
Heparin/Heparan sulfate	MYL9	Dataset PMID:21454685	1471071
Heparin/Heparan sulfate	LAMA1	Dataset PMID:24246365;Dataset PMID:21454685	2303489;10893232;11098055;11304538;10022829
Heparin/Heparan sulfate	ATP5F1A	Dataset PMID:21454685	15710745
Heparin/Heparan sulfate	COL5A3	GO	GO_REF:0000107
Heparin/Heparan sulfate	PTX3	MatrixDB	19050261
Heparin/Heparan sulfate	PON1	MatrixDB	21454685
Heparin/Heparan sulfate	DPP4	MatrixDB	21454685
Heparin/Heparan sulfate	CFP	Dataset PMID:24246365;Dataset PMID:21454685	16125850
Heparin/Heparan sulfate	GRN	MatrixDB	19755719
Heparin/Heparan sulfate	PCSK6	Dataset PMID:21454685;GO	12535616
Heparin/Heparan sulfate	CTGF	Dataset PMID:21454685;GO;UniProtKB	9242708
Heparin/Heparan sulfate	IL12B	Dataset PMID:21454685	9916734
Heparin/Heparan sulfate	SERPINA4	Dataset PMID:24246365	11016932
Heparin/Heparan sulfate	AQP1	MatrixDB	21454685
Heparin/Heparan sulfate	PEBP1	MatrixDB	21454685
Heparin/Heparan sulfate	LRPAP1	MatrixDB;Dataset PMID:21454685;GO;UniProtKB	21454685;11382778
Heparin/Heparan sulfate	FGF9	Dataset PMID:21454685;GO;UniProtKB	11223514
Heparin/Heparan sulfate	L1CAM	Dataset PMID:24246365	9949192
Heparin/Heparan sulfate	BTC	Dataset PMID:21454685	17673511
Heparin/Heparan sulfate	ADRA1B	MatrixDB;GO;UniProtKB	21454685
Heparin/Heparan sulfate	THBS2	Dataset PMID:21454685;GO;UniProtKB	7798222
Heparin/Heparan sulfate	THBS4	Dataset PMID:21454685;GO	7852353
Heparin/Heparan sulfate	IDUA	UniProtKB	2917561
Heparin/Heparan sulfate	FBN1	MatrixDB;Dataset PMID:24246365;Dataset PMID:21454685;GO;UniProtKB	12837131;15980072;11461921;25034023
Heparin/Heparan sulfate	FBN2	MatrixDB;Dataset PMID:21454685	12837131
Heparin/Heparan sulfate	TIMP3	MatrixDB	10900194
Heparin/Heparan sulfate	ATP7B	MatrixDB	21454685
Heparin/Heparan sulfate	KDR	Dataset PMID:21454685	9386990
Heparin/Heparan sulfate	SLC16A2	MatrixDB	21454685
Heparin/Heparan sulfate	SERPINF1	Dataset PMID:24246365;Dataset PMID:21454685	8976566;12641447
Heparin/Heparan sulfate	SNCA	Dataset PMID:21454685	11814343
Heparin/Heparan sulfate	SPAM1	SRB lab manual curation	DOI: 10.1016/j.smallrumres.2013.01.005
Heparin/Heparan sulfate	COL18A1	Dataset PMID:21454685;UniProtKB	14585835
Heparin/Heparan sulfate	PLA2G5	GO	GO_REF:0000107
Heparin/Heparan sulfate	GDNF	Dataset PMID:21454685	17298301
Heparin/Heparan sulfate	ASIP	Dataset PMID:21454685	11461706
Heparin/Heparan sulfate	LIFR	MatrixDB	21454685
Heparin/Heparan sulfate	ECE1	MatrixDB	21454685
Heparin/Heparan sulfate	PAFAH1B1	GO	8028668
Heparin/Heparan sulfate	DCC	Dataset PMID:21454685	9341129
Heparin/Heparan sulfate	CTSK	SRB lab manual curation	14645229
Heparin/Heparan sulfate	SLCO1A2	MatrixDB	21454685
Heparin/Heparan sulfate	RPL29	Dataset PMID:24246365;Dataset PMID:21454685;GO;UniProtKB	16004430;8662616
Heparin/Heparan sulfate	XDH	Dataset PMID:24246365;Dataset PMID:21454685	9056242;8424793
Heparin/Heparan sulfate	XCL1	Dataset PMID:24246365;Dataset PMID:21454685	14707146
Heparin/Heparan sulfate	CXCL12	MatrixDB;Dataset PMID:24246365;Dataset PMID:21454685;UniProtKB;SRB lab manual curation	10446158;11087743;15292258;17264079
Heparin/Heparan sulfate	NOV	GO	PAINT_REF:11348
Heparin/Heparan sulfate	THBS3	Dataset PMID:21454685;GO	8288588
Heparin/Heparan sulfate	COMP	Dataset PMID:21454685;GO;UniProtKB	17588949
Heparin/Heparan sulfate	PGF	Dataset PMID:21454685;GO;UniProtKB	8148155
Heparin/Heparan sulfate	VEGFB	Dataset PMID:21454685;GO;UniProtKB	10409677
Heparin/Heparan sulfate	PSEN1	MatrixDB	21454685
Heparin/Heparan sulfate	SELENOP	Dataset PMID:24246365	10782998
Heparin/Heparan sulfate	CAMP	SRB lab manual curation	DOI: 10.1016/j.smallrumres.2013.01.005
Heparin/Heparan sulfate	MMP14	MatrixDB	21454685
Heparin/Heparan sulfate	CCL11	Dataset PMID:24246365;Dataset PMID:21454685	17384413
Heparin/Heparan sulfate	APLP1	MatrixDB;Dataset PMID:21454685;GO;UniProtKB;SRB lab manual curation	7929392;21574595;21930949;25760599
Heparin/Heparan sulfate	HDGF	Dataset PMID:24246365;Dataset PMID:21454685;GO;UniProtKB;SRB lab manual curation	22223757;15491618;17270212;7929202
Heparin/Heparan sulfate	PRELP	MatrixDB;Dataset PMID:24246365;Dataset PMID:21454685;GO;UniProtKB	11007795;11847210
Heparin/Heparan sulfate	SLC7A2	MatrixDB	21454685
Heparin/Heparan sulfate	EFNA3	Dataset PMID:21454685	18715996
Heparin/Heparan sulfate	EFNA5	Dataset PMID:21454685	17317573
Heparin/Heparan sulfate	NDST1	UniProtKB	15253930
Heparin/Heparan sulfate	SLC16A1	MatrixDB	21454685
Heparin/Heparan sulfate	ATP1B3	MatrixDB	21454685
Heparin/Heparan sulfate	FGF8	Dataset PMID:21454685;UniProtKB	12077148;25772309
Heparin/Heparan sulfate	CDH8	MatrixDB	21454685
Heparin/Heparan sulfate	CCL23	Dataset PMID:21454685;GO;UniProtKB	11060285
Heparin/Heparan sulfate	FCGRT	MatrixDB	21454685
Heparin/Heparan sulfate	ITGA1	MatrixDB	21454685
Heparin/Heparan sulfate	BACE1	Dataset PMID:21454685	14530380
Heparin/Heparan sulfate	BACE1 chain	Dataset PMID:24246365	18322391
Heparin/Heparan sulfate	HSD17B7	MatrixDB	21454685
Heparin/Heparan sulfate	EVA1C	GO	19470522
Heparin/Heparan sulfate	TPPP2	SRB lab manual curation	DOI: 10.1016/j.smallrumres.2013.01.005
Heparin/Heparan sulfate	IL2	Dataset PMID:21454685	9597549
Heparin/Heparan sulfate	FGF12	Dataset PMID:21454685;GO	12815063
Heparin/Heparan sulfate	B2M	Dataset PMID:24246365	11818700;15689502
Heparin/Heparan sulfate	TGFB2	Dataset PMID:21454685	9218427
Heparin/Heparan sulfate	CX3CL1	Dataset PMID:21454685	10770945
Heparin/Heparan sulfate	CCL8	Dataset PMID:24246365;Dataset PMID:21454685;GO;UniProtKB	19034645;16033763
Heparin/Heparan sulfate	CCL7	MatrixDB;Dataset PMID:21454685;GO;UniProtKB	27044744;10504268
Heparin/Heparan sulfate	CXCL6	Dataset PMID:21454685;GO;UniProtKB	9225113
Heparin/Heparan sulfate	TNFAIP6	MatrixDB;Dataset PMID:24246365;Dataset PMID:29362135	15183770;27044744;15917224
Heparin/Heparan sulfate	HSPG2	MatrixDB;UniProtKB	19019854;9431988;10092882
Heparin/Heparan sulfate	CYCS	Dataset PMID:21454685	8280115
Heparin/Heparan sulfate	COL18A1 PFRAG1 (PRO_0000005794)*	MatrixDB;Dataset PMID:24246365	9687493;14585835;19542224;12812520Ê
Heparin/Heparan sulfate	MMP2 PFRAG (PRO_0000391626)*	MatrixDB	9054449
Heparin/Heparan sulfate	APP PFRAG1 (PRO_0000000092)*	MatrixDB	19542224;28106549
Heparin/Heparan sulfate	COL5A1 PFRAG (HepV)	MatrixDB	9614116;10862775;16815843
Heparin/Heparan sulfate	COL18A1 PFRAG2 (PRO_0000441861)*	MatrixDB	9687493
Heparin/Heparan sulfate	XCL1 PFRAG (PRO_0000005248)*	MatrixDB	26836755
Heparin/Heparan sulfate	TFAM	SRB lab manual curation	27903899
Heparin/Heparan sulfate	SORD	SRB lab manual curation	DOI: 10.1016/j.smallrumres.2013.01.005
Heparin/Heparan sulfate	DEFA5	Dataset PMID:24246365	19654318
Heparin/Heparan sulfate	NRG1	MatrixDB;Dataset PMID:24246365;Dataset PMID:21454685	15528194;9566971;21536100
Heparin/Heparan sulfate	HIST1H1A	GO	GO_REF:0000107
Heparin/Heparan sulfate	TGFBR3	GO	1333192
Heparin/Heparan sulfate	COL14A1	Dataset PMID:21454685	10350466
Heparin/Heparan sulfate	ITIH3	MatrixDB	21454685
Heparin/Heparan sulfate	APLP2	MatrixDB;Dataset PMID:21454685;GO;UniProtKB	7929392
Heparin/Heparan sulfate	BSPH1	GO	PAINT_REF:22918
Heparin/Heparan sulfate	LRP1	MatrixDB;GO;UniProtKB	17326667;21289173;22467855
Heparin/Heparan sulfate	SLC20A2	MatrixDB	21454685
Heparin/Heparan sulfate	CD47	MatrixDB	21454685
Heparin/Heparan sulfate	FSTL1	Dataset PMID:21454685;GO;UniProtKB	7957230
Heparin/Heparan sulfate	AIMP1	Dataset PMID:21454685	15710745
Heparin/Heparan sulfate	PRDX4	MatrixDB	21454685
Heparin/Heparan sulfate	NOG	Dataset PMID:21454685	11706034
Heparin/Heparan sulfate	DMP1	SRB lab manual curation	DOI: 10.1016/j.smallrumres.2013.01.005
Heparin/Heparan sulfate	PTPRS	GO;UniProtKB	21454754
Heparin/Heparan sulfate	STIM1	MatrixDB	21454685
Heparin/Heparan sulfate	SEMA5A	Dataset PMID:21454685;UniProtKB	15603739;23940048
Heparin/Heparan sulfate	PTCH1	GO	GO_REF:0000107
Heparin/Heparan sulfate	AAMP	Dataset PMID:21454685;GO	7743515
Heparin/Heparan sulfate	CACNA1S	Dataset PMID:21454685	2162834
Heparin/Heparan sulfate	LAMC2	GO;UniProtKB	GO_REF:0000037
Heparin/Heparan sulfate	FGFBP1	Dataset PMID:21454685;GO	9784842;1885605
Heparin/Heparan sulfate	SCN5A	MatrixDB	21454685
Heparin/Heparan sulfate	IHH	Dataset PMID:21454685	17348690
Heparin/Heparan sulfate	LTBP1	Dataset PMID:24246365;Dataset PMID:21454685	20699357;17580303
Heparin/Heparan sulfate	LTBP2	MatrixDB;Dataset PMID:24246365;GO;UniProtKB	20382221
Heparin/Heparan sulfate	GPNMB	GO	19350579
Heparin/Heparan sulfate	SLC10A1	MatrixDB	21454685
Heparin/Heparan sulfate	COL19A1	Dataset PMID:21454685	12788917
Heparin/Heparan sulfate	POSTN	GO;UniProtKB	GO_REF:0000024
Heparin/Heparan sulfate	ZNF146	GO	8665923
Heparin/Heparan sulfate	PDIA6	MatrixDB	21454685
Heparin/Heparan sulfate	AGER	GO	GO_REF:0000107
Heparin/Heparan sulfate	PCOLCE	MatrixDB;Dataset PMID:24246365;GO	24117177;20729553;12393877
Heparin/Heparan sulfate	PON2	MatrixDB	21454685
Heparin/Heparan sulfate	PON3	MatrixDB	21454685
Heparin/Heparan sulfate	SHH	Dataset PMID:24246365;Dataset PMID:21454685;UniProtKB;SRB lab manual curation	17348690;22049079;24062467
Heparin/Heparan sulfate	TPSAB1	Dataset PMID:21454685	15567416
Heparin/Heparan sulfate	IGFBP7	SRB lab manual curation	24737780
Heparin/Heparan sulfate	LAMA4	MatrixDB;Dataset PMID:24246365	10893232
Heparin/Heparan sulfate	ECM1	SRB lab manual curation	DOI: 10.1016/j.smallrumres.2013.01.005
Heparin/Heparan sulfate	OCLN	MatrixDB	21454685
Heparin/Heparan sulfate	CCL15	Dataset PMID:21454685;GO;UniProtKB	14984572
Heparin/Heparan sulfate	LAMA3	MatrixDB;Dataset PMID:24246365	11373281
Heparin/Heparan sulfate	UGP2	SRB lab manual curation	DOI: 10.1016/j.smallrumres.2013.01.005
Heparin/Heparan sulfate	RSPO4	Dataset PMID:21454685;GO;UniProtKB	19238248
Heparin/Heparan sulfate	RSPO1	Dataset PMID:21454685;GO;UniProtKB	16543246
Heparin/Heparan sulfate	HFE	MatrixDB	21454685
Heparin/Heparan sulfate	CDON	Dataset PMID:24246365	17348690
Heparin/Heparan sulfate	HSD17B12	MatrixDB;GO	21454685
Heparin/Heparan sulfate	FBLN7	Dataset PMID:21454685;GO;UniProtKB	17699513
Heparin/Heparan sulfate	ARTN	Dataset PMID:21454685	17298301
Heparin/Heparan sulfate	COL13A1	Dataset PMID:21454685;GO;UniProtKB	11956183
Heparin/Heparan sulfate	STEAP4	MatrixDB	21454685
Heparin/Heparan sulfate	IRGC	MatrixDB	21454685
Heparin/Heparan sulfate	PLBD1	MatrixDB	21454685
Heparin/Heparan sulfate	SLC39A4	MatrixDB	21454685
Heparin/Heparan sulfate	NOTUM	SRB lab manual curation	25731175
Heparin/Heparan sulfate	APOA5	MatrixDB;Dataset PMID:21454685;GO	17326667;15878877
Heparin/Heparan sulfate	PRSS57	GO;UniProtKB	25156428
Heparin/Heparan sulfate	NPNT	MatrixDB	23357641
Heparin/Heparan sulfate	RSPO2	Dataset PMID:21454685;GO;UniProtKB	16543246
Heparin/Heparan sulfate	LIPI	GO;UniProtKB	12963729
Heparin/Heparan sulfate	TMEM184A	GO	GO_REF:0000024
Heparin/Heparan sulfate	ADAMTSL5	MatrixDB;GO;UniProtKB	23010571
Heparin/Heparan sulfate	CCDC80	GO	GO_REF:0000107
Heparin/Heparan sulfate	HS2ST1	UniProtKB;SRB lab manual curation	21224284
Heparin/Heparan sulfate	HSD17B13	MatrixDB	21454685
Heparin/Heparan sulfate	ABI3BP	GO	GO_REF:0000107
Heparin/Heparan sulfate	RTN4RL1	GO	GO_REF:0000024
Heparin/Heparan sulfate	COL23A1	Dataset PMID:21454685	12644459
Heparin/Heparan sulfate	XYLT1	UniProtKB	19289103
Heparin/Heparan sulfate	NAV2	GO	GO_REF:0000107
Heparin/Heparan sulfate	SULF2	UniProtKB	23480519
Heparin/Heparan sulfate	SULF1	Dataset PMID:24246365;UniProtKB	19666466;27812771
Heparin/Heparan sulfate	HS3ST5	UniProtKB	12907690
Heparin/Heparan sulfate	DEFB106A	GO	24189797
Heparin/Heparan sulfate	NXPE1	MatrixDB	21454685
Heparin/Heparan sulfate	FGFRL1	GO	12813049;1806116
Heparin/Heparan sulfate	SFRP1	Dataset PMID:21454685;GO	9192640;10660608;11741940
Heparin/Heparan sulfate	HSD17B11	MatrixDB	21454685
Heparin/Heparan sulfate	SERBP1	MatrixDB	21454685
Heparin/Heparan sulfate	FGFBP3	GO;UniProtKB	18669637
Heparin/Heparan sulfate	NDNF	GO;UniProtKB	17298301
Heparin/Heparan sulfate	ITFG1	MatrixDB	21454685
Heparin/Heparan sulfate	ADAMTS15	GO	GO_REF:0000107
Heparin/Heparan sulfate	HPSE2	GO;UniProtKB	20576607
Heparin/Heparan sulfate	STAB2	MatrixDB;GO;UniProtKB	21454685;12963729
Heparin/Heparan sulfate	NCSTN	MatrixDB	21454685
Heparin/Heparan sulfate	CCL17	Dataset PMID:21454685	11286540
Heparin/Heparan sulfate	SORL1	MatrixDB	17326667
Heparin/Heparan sulfate	PCSK5	Dataset PMID:21454685	12535616
Heparin/Heparan sulfate	NELL1	SRB lab manual curation	26627376
Heparin/Heparan sulfate	FGF14	Dataset PMID:21454685;GO	12815063
Heparin/Heparan sulfate	SLC38A4	MatrixDB	21454685
Heparin/Heparan sulfate	ELSPBP1	GO	PAINT_REF:22918
Heparin/Heparan sulfate	SLC22A18	MatrixDB	21454685
Heparin/Heparan sulfate	ORAI1	MatrixDB	21454685
Heparin/Heparan sulfate	ZG16B	SRB lab manual curation	DOI: 10.1016/j.smallrumres.2013.01.005
Heparin/Heparan sulfate	BCAN	MatrixDB	19576282
Heparin/Heparan sulfate	CPB2	MatrixDB	21454685
Heparin/Heparan sulfate	HS6ST2	UniProtKB	7876170
Heparin/Heparan sulfate	SLC46A1	MatrixDB	21454685
Heparin/Heparan sulfate	HBEGF	Dataset PMID:24246365;Dataset PMID:21454685;GO;UniProtKB	12552001;8300582;9135143
Heparin/Heparan sulfate	SORT1	MatrixDB	21454685
Heparin/Heparan sulfate	CCL13	Dataset PMID:21454685	10770945
Heparin/Heparan sulfate	SLC38A3	MatrixDB	21454685
Heparin/Heparan sulfate	COL12A1	Dataset PMID:21454685	7642694
Heparin/Heparan sulfate	CCL19	MatrixDB;Dataset PMID:21454685	27044744;18030990
Heparin/Heparan sulfate	NRTN	Dataset PMID:21454685	17298301
Heparin/Heparan sulfate	SOST	Dataset PMID:21454685;GO;UniProtKB	19208630
Heparin/Heparan sulfate	FAM213A	MatrixDB	21454685
Heparin/Heparan sulfate	LXN	GO;UniProtKB	GO_REF:0000037
Heparin/Heparan sulfate	LGR4	MatrixDB	21454685
Heparin/Heparan sulfate	SLC12A9	MatrixDB	21454685
Heparin/Heparan sulfate	COL25A1	Dataset PMID:21454685;GO;UniProtKB	15615705;15522881
Heparin/Heparan sulfate	RSPO3	Dataset PMID:21454685;GO;UniProtKB	16543246
Heparin/Heparan sulfate	ANGPTL4	MatrixDB;Dataset PMID:24246365	19019854
Heparin/Heparan sulfate	REG4	GO	20692269
Heparin/Heparan sulfate	RTN4R	GO	GO_REF:0000024
Heparin/Heparan sulfate	IMPG2	MatrixDB;GO;UniProtKB	15044457
Heparin/Heparan sulfate	FGF23	UniProtKB	22396159
Heparin/Heparan sulfate	CRISPLD2	GO	GO_REF:0000107
Heparin/Heparan sulfate	XYLT2	SRB lab manual curation	19289103
Heparin/Heparan sulfate	ABCG5	MatrixDB	21454685
Heparin/Heparan sulfate	CXCL16	Dataset PMID:21454685	18030990
Heparin/Heparan sulfate	CHRD	MatrixDB;Dataset PMID:21454685;GO	15381701
Heparin/Heparan sulfate	SMOC2	GO	GO_REF:0000107
Heparin/Heparan sulfate	SMOC1	Dataset PMID:24246365;SRB lab manual curation	23437253
Heparin/Heparan sulfate	TFB2M	SRB lab manual curation	27903899
Heparin/Heparan sulfate	CCDC134	MatrixDB	21454685
Heparin/Heparan sulfate	GREM2	GO;UniProtKB	28104757
Heparin/Heparan sulfate	FGF22	Dataset PMID:21454685	18835578
Heparin/Heparan sulfate	FGF20	Dataset PMID:21454685;UniProtKB	17397238;27030175
Heparin/Heparan sulfate	CCL28	Dataset PMID:21454685	18030990
Heparin/Heparan sulfate	PLA2G3	UniProtKB	21690215;168536
Heparin/Heparan sulfate	ADA2	Dataset PMID:24246365;GO;UniProtKB	20147294;20453107
Heparin/Heparan sulfate	SEMA5B	Dataset PMID:21454685	17317573
Heparin/Heparan sulfate	ADAMTS9	Dataset PMID:21454685	16507336
Heparin/Heparan sulfate	OPTC	Dataset PMID:24246365	16303928
Heparin/Heparan sulfate	CTSZ	SRB lab manual curation	15797245
Heparin/Heparan sulfate	DMBT1	UniProtKB	19189310
Heparin/Heparan sulfate	FETUB	MatrixDB	21454685
Heparin/Heparan sulfate	ADAMTS1	Dataset PMID:21454685;GO;UniProtKB	9593739
Heparin/Heparan sulfate	LNPEP	MatrixDB	21454685
Heparin/Heparan sulfate	SERPINA10	Dataset PMID:24246365;GO;UniProtKB	22540147
Heparin/Heparan sulfate	TENM1	Dataset PMID:21454685;GO	10341219
Heparin/Heparan sulfate	PCOLCE2	Dataset PMID:21454685;GO;UniProtKB	12393877
Heparin/Heparan sulfate	ADAMTS5	Dataset PMID:21454685;GO	16507336
Heparin/Heparan sulfate	PLA2G2D	GO;UniProtKB	12047378;11034411
Heparin/Heparan sulfate	ABCG2	MatrixDB	21454685
Heparin/Heparan sulfate	TFR2	MatrixDB	21454685
Heparin/Heparan sulfate	ADAMTS8	GO;UniProtKB	GO_REF:0000037
Heparin/Heparan sulfate	COLQ	MatrixDB;Dataset PMID:21454685;UniProtKB	3161900;12684510;10926855;7744733
Heparin/Heparan sulfate	HPSE	UniProtKB	20576607
Heparin/Heparan sulfate	ITM2B	MatrixDB	21454685
Heparin/Heparan sulfate	CCL27	Dataset PMID:21454685	16033763
Heparin/Heparan sulfate	ANGPTL3	GO;UniProtKB	GO_REF:0000037
Heparin/Heparan sulfate	LIPG	GO;UniProtKB	GO_REF:0000037
Heparin/Heparan sulfate	ADGRG1	GO;UniProtKB	27068534
Heparin/Heparan sulfate	HS3ST3A1	SRB lab manual curation	15304505
Heparin/Heparan sulfate	SLC22A7	MatrixDB	21454685
Heparin/Heparan sulfate	SLC30A1	MatrixDB	21454685
Heparin/Heparan sulfate	ROBO1	Dataset PMID:21454685	18359766
Heparin/Heparan sulfate	SLC4A4	MatrixDB	21454685
Heparin/Heparan sulfate	LOX PFRAG (PRO_0000018520)*	SRB lab manual curation	30082873
HRG	PLG	SRB lab manual curation	6690483;4008652
HRG	THBS1	SRB lab manual curation	4008652
HRG	THBS1,THBS1,THBS1 CPX	SRB lab manual curation	6690483;4008652;11134179
HSD17B12	MAP2	MatrixDB	30021884
HSPA1A	LOX PFRAG (PRO_0000018520)*	MatrixDB	21536655
HSPA1A	MAPT	MatrixDB	29764935;29764935;21985244
HSPA1A	PLG	MatrixDB	17206383;17206383
HSPA1A	PLK1	MatrixDB	21887822;21887822;21887822;21887822;21887822
HSPA1A	SNCA	MatrixDB	19875982;19875982;19875982;19875982;19875982;19875982;21985244
HSPA1A	SOD1	MatrixDB	19171884;19171884;19171884;19171884
HSPA1A	TGM2	MatrixDB	21988832
HSPG2	KDR	MatrixDB	21596751;23374253;23374253;23374253;23374253
HSPG2	LAMA1,LAMB1,LAMC1,NID1 CPX	SRB lab manual curation	10092882;10092882
HSPG2	LTBP2	MatrixDB	20382221
HSPG2	NPNT	MatrixDB	23357641
HSPG2	PDGFB,PDGFB CPX	MatrixDB	9692901
HSPG2	TNC	Dataset PMID:19838819	9217327
HSPG2	VEGFA	MatrixDB	19422911
HSPG2	VEGFA,VEGFA CPX	MatrixDB	19422911
HYAL2	PON2	BioPlex 2.0	26186194;28514442
Hyaluronan	ITGA5,ITGB1 CPX	MatrixDB	19542224
Hyaluronan	LGALS8	SRB lab manual curation	20375348
Hyaluronan	NCAN	MatrixDB;GO;UniProtKB	19576282
Hyaluronan	SUSD5	GO;UniProtKB	GO_REF:0000002
Hyaluronan	HMMR	GO;UniProtKB	PAINT_REF:18956
Hyaluronan	ALB	MatrixDB	19394422
Hyaluronan	HAPLN1	GO;UniProtKB	PAINT_REF:22804
Hyaluronan	COL6A3	MatrixDB	1425570
Hyaluronan	VCAN	MatrixDB;GO;UniProtKB	15980072
Hyaluronan	GFAP	SRB lab manual curation	20375348
Hyaluronan	CD44	SRB lab manual curation;GO;UniProtKB	24606063;17293874;17170110;17324121;1991450
Hyaluronan	ACAN	GO;UniProtKB	PAINT_REF:22804
Hyaluronan	ITIH2	UniProtKB
Hyaluronan	ITIH1	UniProtKB
Hyaluronan	IRS1	SRB lab manual curation	20375348
Hyaluronan	SPAM1	MatrixDB	22142621
Hyaluronan	CABP4	SRB lab manual curation	20375348
Hyaluronan	TNFAIP6	MatrixDB;Dataset PMID:24246365;Dataset PMID:29362135;GO;UniProtKB	15183770;24005673;15917224;21596748;15060082;26823460;16873769;26468290;15840581
Hyaluronan	LOX PFRAG (PRO_0000018520)*	SRB lab manual curation	30082873
Hyaluronan	APP PFRAG1 (PRO_0000000092)*	MatrixDB	19542224
Hyaluronan	C1QBP	GO;UniProtKB	8567680
Hyaluronan	USP17L24	GO;UniProtKB	17109758
Hyaluronan	HYAL1	MatrixDB	18083358;18337076;19394422;20043995
Hyaluronan	HYAL2	GO;UniProtKB	12676986;19443707
Hyaluronan	HABP2	MatrixDB;UniProtKB	22142621
Hyaluronan	PCOLCE	MatrixDB	24117177
Hyaluronan	IGFBP7	SRB lab manual curation	12847218
Hyaluronan	HADH	SRB lab manual curation	20375348
Hyaluronan	HABP4	UniProtKB
Hyaluronan	USP17L6P	GO	17109758
Hyaluronan	LAYN	GO;UniProtKB	11294894
Hyaluronan	HAPLN4	GO;UniProtKB	PAINT_REF:22804
Hyaluronan	KRTAP13-1	SRB lab manual curation	20375348
Hyaluronan	CEMIP	GO;UniProtKB	23509262
Hyaluronan	STAB2	GO;UniProtKB	GO_REF:0000024
Hyaluronan	BCAN	MatrixDB;GO;UniProtKB	19576282
Hyaluronan	HAPLN3	GO;UniProtKB	PAINT_REF:22804
Hyaluronan	IMPG2	MatrixDB;GO;UniProtKB	15044457;10702256
Hyaluronan	HAPLN2	GO;UniProtKB	PAINT_REF:22804
Hyaluronan	CHODL	GO	12079284
Hyaluronan	STAB1	GO;UniProtKB	GO_REF:0000002
Hyaluronan	CEMIP2	GO	PAINT_REF:15535
Hyaluronan	LYVE1	GO;UniProtKB	GO_REF:0000107
IAPP	IAPP	MatrixDB	21130765;21130765;24042052;24561193;24561193;24561193;24561193;17640888;17640888;18408164;18408164;18408164
IGFBP3	TNC	SRB lab manual curation	23637968
IGFBP5	PDIA6	MatrixDB	30021884
IGFBP5	THBS1,THBS1,THBS1 CPX	SRB lab manual curation	10698186
IGFBP5	TNC	SRB lab manual curation	23637968
IGFBP7	IGFBP7	MatrixDB	18296487
IGFBP7	ITGAV,ITGB3 CPX	SRB lab manual curation	24737780
IL10	IL10	MatrixDB	12513909
IL12B	IL12B	MatrixDB	7527811;7527811
IRAK4	IRAK4	MatrixDB	24316379
ITFG1	SERBP1	MatrixDB	21900206
ITGA1	ITGB1	Adhesome	8846021; 12883474; 8428973
ITGA1	LGALS8	BioPlex 2.0	26186194;28514442
ITGA2B,ITGB3 CPX	THBS1,THBS1,THBS1 CPX	SRB lab manual curation	8240284;2478219
ITGA5	ITGB1	Adhesome	16099422; 21947080; 20643357; 12883474; 7504269; 12724312
ITGA5	ITGB3	Adhesome	1694173; 11756480
ITGA5	LGALS8	BioPlex 2.0	26186194;28514442
ITGA5	NRP1	MatrixDB;Adhesome	19175293;19175293;19175293
ITGA5,ITGB1 CPX	TGM2	MatrixDB	19542224
ITGA5,ITGB1 CPX	THBS1,THBS1,THBS1 CPX	SRB lab manual curation	17413041;8100842
ITGA6	ITGB1	MatrixDB;Adhesome	2649503;8143784; 11741585; 2649503
ITGA6	LGALS8	BioPlex 2.0	26186194;28514442
ITGAV	ITGB1	Adhesome	2138612; 1690718
ITGAV	ITGB3	Adhesome	16099422; 11884718; 15299032; 11546839; 1694173
ITGAV	KDR	SRB lab manual curation	15615705
ITGAV	MMP14	Adhesome	11741954
ITGAV,ITGB3 CPX	MMP2	MatrixDB	9476898;11134507
ITGAV,ITGB3 CPX	MMP2 PFRAG (PRO_0000391626)*	MatrixDB	9476898
ITGAV,ITGB3 CPX	TGM2	MatrixDB	19542224
ITGAV,ITGB3 CPX	THBS1,THBS1,THBS1 CPX	SRB lab manual curation	2478219
ITGAV,ITGB3 CPX	TNC	Dataset PMID:19838819	7693733
ITGAV,ITGB3 CPX	VTN	MatrixDB	11134507
ITGB1	LGALS8	BioPlex 2.0	26186194;28514442
ITGB1	LGALS9	BioPlex 2.0	26186194;28514442
ITGB1	LYN	Adhesome	14593208
ITGB1	PTK2B	Adhesome	15695828; 9022036; 9366396
ITGB1	SLC3A2	Adhesome	11507094; 12181350; 10671548
ITGB1	SRC	Adhesome	11723131; 10592173
ITGB1	THBS1	SRB lab manual curation	15292271
ITGB1	VEGFB	MatrixDB	15102471;15102471
ITGB3	LYN	Adhesome	14593208
ITGB3	PTK2B	Adhesome	11683411
ITGB3	SRC	Adhesome	17353363; 18840695; 10592173
ITIH1	TNFAIP6	Dataset PMID:29362135	11594731;11594731;15653696;18820257
ITIH2	LIPG	BioPlex 2.0	26186194;28514442
ITIH2	MAPT	MatrixDB	26402096
ITIH2	TNFAIP6	Dataset PMID:29362135	11594731;11594731;15653696;18820257
ITIH2	ZG16B	BioPlex 2.0	26186194;28514442
ITIH3	MAPT	MatrixDB	26402096
ITIH3	TNFAIP6	Dataset PMID:29362135	11594731;18448433
ITM2B	NEK2	MatrixDB	26496610
ITM2B	SEMA6A	BioPlex 2.0	26186194;28514442
KCNAB1	SNCA	MatrixDB	18614564
KCNAB2	SNCA	MatrixDB	18614564
KDR	KDR	MatrixDB	17293873;20080685;20080685
KDR	MET	MatrixDB	22789536;22789536;22789536
KDR	NRP1	MatrixDB	16763549;17222790
KDR	SRC	MatrixDB	18377662;18662404;12509223;12509223;12509223;12509223
KDR	VEGFA	MatrixDB	21596751;16763549;22897854;22897854;1417831;1417831;23374253;20660291;23583373;20145116;20145116;1417831;20660291
Keratan sulfate	E2F8	SRB lab manual curation	20375348
Keratan sulfate	WWP2	SRB lab manual curation	20375348
Keratan sulfate	STK25	SRB lab manual curation	20375348
Keratan sulfate	LAD1	SRB lab manual curation	20375348
Keratan sulfate	EBAG9	SRB lab manual curation	20375348
Keratan sulfate	NTN3	SRB lab manual curation	20375348
Keratan sulfate	ABLIM1	SRB lab manual curation	20375348
Keratan sulfate	AURKA	SRB lab manual curation	20375348
Keratan sulfate	SEMA3E	SRB lab manual curation	20375348
Keratan sulfate	KIF3B	SRB lab manual curation	20375348
Keratan sulfate	CHUK	SRB lab manual curation	20375348
Keratan sulfate	DAPK3	SRB lab manual curation	20375348
Keratan sulfate	RGS14	SRB lab manual curation	20375348
Keratan sulfate	DCX	SRB lab manual curation	20375348
Keratan sulfate	EFNA2	SRB lab manual curation	20375348
Keratan sulfate	NUAK1	SRB lab manual curation	20375348
Keratan sulfate	NMT2	SRB lab manual curation	20375348
Keratan sulfate	CCNT1	SRB lab manual curation	20375348
Keratan sulfate	PQBP1	SRB lab manual curation	20375348
Keratan sulfate	SLIT3	SRB lab manual curation	20375348
Keratan sulfate	RPS6KA4	SRB lab manual curation	20375348
Keratan sulfate	BCAR3	SRB lab manual curation	20375348
Keratan sulfate	EIF3G	SRB lab manual curation	20375348
Keratan sulfate	DNAJC8	SRB lab manual curation	20375348
Keratan sulfate	TPPP	SRB lab manual curation	20375348
Keratan sulfate	SLIT2	SRB lab manual curation	20375348
Keratan sulfate	SCEL	SRB lab manual curation	20375348
Keratan sulfate	FMNL1	SRB lab manual curation	20375348
Keratan sulfate	NTN1	SRB lab manual curation	20375348
Keratan sulfate	FGFR1OP	SRB lab manual curation	20375348
Keratan sulfate	PAK4	SRB lab manual curation	20375348
Keratan sulfate	ABL1	SRB lab manual curation	20375348
Keratan sulfate	PDGFB	SRB lab manual curation	20375348
Keratan sulfate	LMNA	SRB lab manual curation	20375348
Keratan sulfate	PDGFA	SRB lab manual curation	20375348
Keratan sulfate	ERBB2	SRB lab manual curation	20375348
Keratan sulfate	NTRK1	SRB lab manual curation	20375348
Keratan sulfate	HMGN1	SRB lab manual curation	20375348
Keratan sulfate	CDK1	SRB lab manual curation	20375348
Keratan sulfate	NPM1	SRB lab manual curation	20375348
Keratan sulfate	FES	SRB lab manual curation	20375348
Keratan sulfate	YES1	SRB lab manual curation	20375348
Keratan sulfate	LYN	SRB lab manual curation	20375348
Keratan sulfate	HCK	SRB lab manual curation	20375348
Keratan sulfate	HMGB1	SRB lab manual curation	20375348
Keratan sulfate	TFPT	SRB lab manual curation	20375348
Keratan sulfate	KIT	SRB lab manual curation	20375348
Keratan sulfate	MAP2	SRB lab manual curation	20375348
Keratan sulfate	FGFR1	SRB lab manual curation	20375348
Keratan sulfate	SRC	SRB lab manual curation	20375348
Keratan sulfate	TNFRSF1B	SRB lab manual curation	20375348
Keratan sulfate	EFNA1	SRB lab manual curation	20375348
Keratan sulfate	EPHA1	SRB lab manual curation	20375348
Keratan sulfate	ITGA6	SRB lab manual curation	20375348
Keratan sulfate	EPHA2	SRB lab manual curation	20375348
Keratan sulfate	EPHA3	SRB lab manual curation	20375348
Keratan sulfate	EPHA8	SRB lab manual curation	20375348
Keratan sulfate	NMT1	SRB lab manual curation	20375348
Keratan sulfate	AXL	SRB lab manual curation	20375348
Keratan sulfate	TTK	SRB lab manual curation	20375348
Keratan sulfate	CTNNA1	SRB lab manual curation	20375348
Keratan sulfate	IRS1	SRB lab manual curation	20375348
Keratan sulfate	ADD2	SRB lab manual curation	20375348
Keratan sulfate	KDR	SRB lab manual curation	20375348
Keratan sulfate	MAP2K2	SRB lab manual curation	20375348
Keratan sulfate	FLT3	SRB lab manual curation	20375348
Keratan sulfate	COIL	SRB lab manual curation	20375348
Keratan sulfate	ACTR1B	SRB lab manual curation	20375348
Keratan sulfate	ABL2	SRB lab manual curation	20375348
Keratan sulfate	DCC	SRB lab manual curation	20375348
Keratan sulfate	CTSK	SRB lab manual curation	14645229
Keratan sulfate	CDKN1B	SRB lab manual curation	20375348
Keratan sulfate	CSNK1E	SRB lab manual curation	20375348
Keratan sulfate	GSK3B	SRB lab manual curation	20375348
Keratan sulfate	LIG3	SRB lab manual curation	20375348
Keratan sulfate	MEOX1	SRB lab manual curation	20375348
Keratan sulfate	DNM2	SRB lab manual curation	20375348
Keratan sulfate	DAP	SRB lab manual curation	20375348
Keratan sulfate	BMX	SRB lab manual curation	20375348
Keratan sulfate	NEK2	SRB lab manual curation	20375348
Keratan sulfate	NEK3	SRB lab manual curation	20375348
Keratan sulfate	NEK4	SRB lab manual curation	20375348
Keratan sulfate	MAP2K6	SRB lab manual curation	20375348
Keratan sulfate	EFNA3	SRB lab manual curation	20375348
Keratan sulfate	EFNA4	SRB lab manual curation	20375348
Keratan sulfate	EFNB2	SRB lab manual curation	20375348
Keratan sulfate	EFNA5	SRB lab manual curation	20375348
Keratan sulfate	PLK1	SRB lab manual curation	20375348
Keratan sulfate	EPHB3	SRB lab manual curation	20375348
Keratan sulfate	EPHB4	SRB lab manual curation	20375348
Keratan sulfate	EPHB1	SRB lab manual curation	20375348
Keratan sulfate	EPHA4	SRB lab manual curation	20375348
Keratan sulfate	EIF5	SRB lab manual curation	20375348
Keratan sulfate	ARPP19	SRB lab manual curation	20375348
Keratan sulfate	CSNK1G2	SRB lab manual curation	20375348
Keratan sulfate	EFNB1	SRB lab manual curation	20375348
Keratan sulfate	FKBP3	SRB lab manual curation	20375348
Keratan sulfate	NRG1	SRB lab manual curation	20375348
Keratan sulfate	CACNB1	SRB lab manual curation	20375348
Keratan sulfate	MAP3K10	SRB lab manual curation	20375348
Keratan sulfate	BTK	SRB lab manual curation	20375348
Keratan sulfate	DMTN	SRB lab manual curation	20375348
Keratan sulfate	PPID	SRB lab manual curation	20375348
Keratan sulfate	IFRD2	SRB lab manual curation	20375348
Keratan sulfate	AIMP1	SRB lab manual curation	20375348
Keratan sulfate	PPP1R8	SRB lab manual curation	20375348
Keratan sulfate	COASY	SRB lab manual curation	20375348
Keratan sulfate	PAK1	SRB lab manual curation	20375348
Keratan sulfate	PRKG2	SRB lab manual curation	20375348
Keratan sulfate	SEMA3F	SRB lab manual curation	20375348
Keratan sulfate	G3BP1	SRB lab manual curation	20375348
Keratan sulfate	KCNAB2	SRB lab manual curation	20375348
Keratan sulfate	PDAP1	SRB lab manual curation	20375348
Keratan sulfate	ZMYM3	SRB lab manual curation	20375348
Keratan sulfate	PTK2B	SRB lab manual curation	20375348
Keratan sulfate	FAM50A	SRB lab manual curation	20375348
Keratan sulfate	CAPRIN1	SRB lab manual curation	20375348
Keratan sulfate	SEMA3A	SRB lab manual curation	20375348
Keratan sulfate	MESD	SRB lab manual curation	20375348
Keratan sulfate	BRD3	SRB lab manual curation	20375348
Keratan sulfate	ERBB4	SRB lab manual curation	20375348
Keratan sulfate	RPS6KA2	SRB lab manual curation	20375348
Keratan sulfate	EPHA7	SRB lab manual curation	20375348
Keratan sulfate	RPS6KA1	SRB lab manual curation	20375348
Keratan sulfate	MAPRE1	SRB lab manual curation	20375348
Keratan sulfate	EFNB3	SRB lab manual curation	20375348
Keratan sulfate	IGFBP7	SRB lab manual curation	12847218
Keratan sulfate	NTRK3	SRB lab manual curation	20375348
Keratan sulfate	PKN2	SRB lab manual curation	20375348
Keratan sulfate	NTRK2	SRB lab manual curation	20375348
Keratan sulfate	MAPKAPK3	SRB lab manual curation	20375348
Keratan sulfate	UBE2S	SRB lab manual curation	20375348
Keratan sulfate	SMTNL2	SRB lab manual curation	20375348
Keratan sulfate	PRR16	SRB lab manual curation	20375348
Keratan sulfate	ODF2	SRB lab manual curation	20375348
Keratan sulfate	ARHGAP17	SRB lab manual curation	20375348
Keratan sulfate	AMMECR1L	SRB lab manual curation	20375348
Keratan sulfate	MZT2A	SRB lab manual curation	20375348
Keratan sulfate	PSRC1	SRB lab manual curation	20375348
Keratan sulfate	GLB1L	SRB lab manual curation	20375348
Keratan sulfate	LARP4	SRB lab manual curation	20375348
Keratan sulfate	ASXL2	SRB lab manual curation	20375348
Keratan sulfate	MARK2	SRB lab manual curation	20375348
Keratan sulfate	EEPD1	SRB lab manual curation	20375348
Keratan sulfate	TRPT1	SRB lab manual curation	20375348
Keratan sulfate	DDX42	SRB lab manual curation	20375348
Keratan sulfate	COL23A1	SRB lab manual curation	20375348
Keratan sulfate	TBC1D10C	SRB lab manual curation	20375348
Keratan sulfate	PRR15	SRB lab manual curation	20375348
Keratan sulfate	VRK3	SRB lab manual curation	20375348
Keratan sulfate	ASXL1	SRB lab manual curation	20375348
Keratan sulfate	UNC5B	SRB lab manual curation	20375348
Keratan sulfate	CRACR2B	SRB lab manual curation	20375348
Keratan sulfate	DCLK2	SRB lab manual curation	20375348
Keratan sulfate	ANKS4B	SRB lab manual curation	20375348
Keratan sulfate	SERBP1	SRB lab manual curation	20375348
Keratan sulfate	PIP4K2C	SRB lab manual curation	20375348
Keratan sulfate	DDX54	SRB lab manual curation	20375348
Keratan sulfate	TCP10L	SRB lab manual curation	20375348
Keratan sulfate	TRUB1	SRB lab manual curation	20375348
Keratan sulfate	ING5	SRB lab manual curation	20375348
Keratan sulfate	RTF1	SRB lab manual curation	20375348
Keratan sulfate	KIAA1143	SRB lab manual curation	20375348
Keratan sulfate	RAD51AP1	SRB lab manual curation	20375348
Keratan sulfate	LENG1	SRB lab manual curation	20375348
Keratan sulfate	AURKB	SRB lab manual curation	20375348
Keratan sulfate	MARK4	SRB lab manual curation	20375348
Keratan sulfate	UBXN10	SRB lab manual curation	20375348
Keratan sulfate	UBE2E2	SRB lab manual curation	20375348
Keratan sulfate	CCDC43	SRB lab manual curation	20375348
Keratan sulfate	TSSK2	SRB lab manual curation	20375348
Keratan sulfate	SRPK1	SRB lab manual curation	20375348
Keratan sulfate	STAC	SRB lab manual curation	20375348
Keratan sulfate	KIF2C	SRB lab manual curation	20375348
Keratan sulfate	PCDHGC3	SRB lab manual curation	20375348
Keratan sulfate	PYM1	SRB lab manual curation	20375348
Keratan sulfate	LARP6	SRB lab manual curation	20375348
Keratan sulfate	DIDO1	SRB lab manual curation	20375348
Keratan sulfate	SLC4A1AP	SRB lab manual curation	20375348
Keratan sulfate	TSSK1B	SRB lab manual curation	20375348
Keratan sulfate	MRPL1	SRB lab manual curation	20375348
Keratan sulfate	NSRP1	SRB lab manual curation	20375348
Keratan sulfate	MYLK2	SRB lab manual curation	20375348
Keratan sulfate	SEMA6A	SRB lab manual curation	20375348
Keratan sulfate	TCEAL2	SRB lab manual curation	20375348
Keratan sulfate	SEMA4A	SRB lab manual curation	20375348
Keratan sulfate	SEMA6B	SRB lab manual curation	20375348
Keratan sulfate	OCEL1	SRB lab manual curation	20375348
Keratan sulfate	RPAP3	SRB lab manual curation	20375348
Keratan sulfate	NTN4	SRB lab manual curation	20375348
Keratan sulfate	SYTL2	SRB lab manual curation	20375348
Keratan sulfate	ROBO2	SRB lab manual curation	20375348
Keratan sulfate	JADE2	SRB lab manual curation	20375348
Keratan sulfate	HOMER2	SRB lab manual curation	20375348
Keratan sulfate	IRAK4	SRB lab manual curation	20375348
Keratan sulfate	MAP3K20	SRB lab manual curation	20375348
Keratan sulfate	NKIRAS1	SRB lab manual curation	20375348
Keratan sulfate	PLK2	SRB lab manual curation	20375348
Keratan sulfate	CWC15	SRB lab manual curation	20375348
Keratan sulfate	SIRPG	SRB lab manual curation	20375348
Keratan sulfate	RPS6KB2	SRB lab manual curation	20375348
Keratan sulfate	CFDP1	SRB lab manual curation	20375348
Keratan sulfate	EPHA6	SRB lab manual curation	20375348
Keratan sulfate	AFF4	SRB lab manual curation	20375348
Keratan sulfate	TBK1	SRB lab manual curation	20375348
Keratan sulfate	DAPK2	SRB lab manual curation	20375348
Keratan sulfate	ANKRD50	SRB lab manual curation	20375348
Keratan sulfate	DDX19B	SRB lab manual curation	20375348
Keratan sulfate	LIMCH1	SRB lab manual curation	20375348
Keratan sulfate	BAIAP2	SRB lab manual curation	20375348
Keratan sulfate	RBM8A	SRB lab manual curation	20375348
Keratan sulfate	ZNF706	SRB lab manual curation	20375348
Keratan sulfate	F11R	SRB lab manual curation	20375348
Keratan sulfate	STK24	SRB lab manual curation	20375348
Keratan sulfate	CSNK1G3	SRB lab manual curation	20375348
Keratan sulfate	ROBO1	SRB lab manual curation	20375348
Keratan sulfate	SETBP1	SRB lab manual curation	20375348
Keratan sulfate	ZHX2	SRB lab manual curation	20375348
KIT	LYN	MatrixDB	24728074;24728074;24728074;24728074;24728074;24728074;24728074
KIT	SRC	MatrixDB	24728074;24728074;24728074;24728074;24728074
KIT	YES1	MatrixDB	24728074;24728074;24728074;24728074;24728074;24728074;24728074
KNG1	THBS1,THBS1,THBS1 CPX	SRB lab manual curation	7974360
LAMA1	LGALS9	BioPlex 2.0	26186194;28514442
LAMA1,LAMB1,LAMC1 CPX	PCOLCE	MatrixDB	24117177;24117177
LAMA1,LAMB1,LAMC1 CPX	TGM2	MatrixDB	19542224
LAMA1,LAMB1,LAMC1 CPX	THBS4	SRB lab manual curation	10956668
LAMA1,LAMB1,LAMC1 CPX	THBS4,THBS4,THBS4,THBS4,THBS4 CPX	SRB lab manual curation	10956668
LAMA1,LAMB1,LAMC1 CPX	TNFRSF11B,TNFRSF11B CPX	SRB lab manual curation	15799029
LAMA4	LGALS8	BioPlex 2.0	26186194;28514442
LAMA4	LGALS9	BioPlex 2.0	26186194;28514442
LAMA4	PTN	MatrixDB	16169070
LAMA5	PIP4K2C	MatrixDB	26496610
LBP	PRDX4	MatrixDB	21988832;21988832;21988832;21988832
LDLR	PRG2	BioPlex 2.0	26186194;28514442
[truncated: 242 more rows]
